# Supplementary material for: Manganese(iii) acetate catalyzed oxidative amination of benzylic C(sp3)–H bonds with nitriles
Source: Royal Society of Chemistry journal article supplement (doi:10.1039/c7ob00512a), 2017-01-01

# Electronic Supporting Information

## Manganese(III) Acetate Catalyzed Oxidative Amination of Benzylic C(sp<sup>3</sup>)-H Bonds with Nitriles

Yaxing Zhang, Jianyu Dong,\* Lixin Liu, Long Liu, Yongbo Zhou,\* and Shuang-Feng Yin

State Key Laboratory of Chemo/Biosensing and Chemometrics, College of Chemistry and  
Chemical Engineering, Hunan University, Changsha, 410082, People's Republic of China

E-mail: djyustc@hotmail.com; zhoub@hnu.edu.cn

### Table of Contents

|                                                                             |         |
|-----------------------------------------------------------------------------|---------|
| 1. General Information                                                      | S2      |
| 2. Experimental Procedure                                                   | S2-S6   |
| 3. Characterization Data for the Products                                   | S7-S18  |
| 4. References                                                               | S18     |
| 5. Copies of <sup>1</sup> H and <sup>13</sup> C NMR Spectra of the Products | S19-S51 |

## 1. General Information

The reactions were carried out in schlenk tubes of 25 mL under N<sub>2</sub> atmosphere. Reagents were used as received unless otherwise noted, and solvents were purified according to standard operation procedure. Column chromatography was performed using Silica Gel 60 (300–400 mesh). The reactions were monitored by GC-MS and GC. GC-MS results were recorded on GC-MS QP 2010, and GC analysis was performed on GC 2010 plus. The <sup>1</sup>H and <sup>13</sup>C NMR spectra were recorded on a Bruker ADVANCE III spectrometer at 400 MHz and 100 MHz respectively, and chemical shifts were reported in parts per million (ppm). The electron ionization (EI) method was used as the ionization method for the HRMS measurement, and the mass analyzer type is TOF for EI. All solvents and reagents were purchased from Energy Chemical, Alfa Aesar, and Aladdin.

## 2. Experimental Procedure

### a) General Experimental Procedure for the Synthesis of Amides

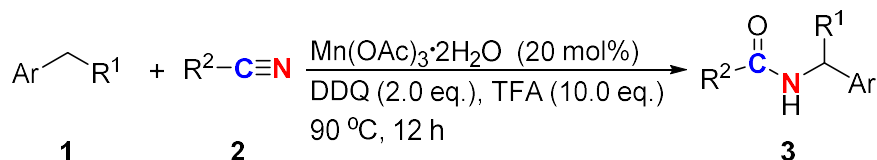

An oven-dried 25 mL Schlenk tube, which was equipped with a magnetic stir bar and charged with Mn(OAc)<sub>3</sub>·2H<sub>2</sub>O and DDQ. After charging nitrogen for three times, TFA (10.0 equiv.), benzylic compound **1** (0.2 mmol), nitrile **2**, and solvent were added. Then the reaction mixture was heated to 90 °C for 12 h. After completion of the reaction, the reaction mixture was cooled down to room temperature, and neutralized by K<sub>2</sub>CO<sub>3</sub>. The crude product was extracted with diethyl ether, dried over anhydrous Na<sub>2</sub>SO<sub>4</sub>, and concentrated under vacuum. The residue was purified by column chromatography on silica gel and eluted with petroleum/ethyl acetate to afford the desired product **3**.

## b) Control Experiments

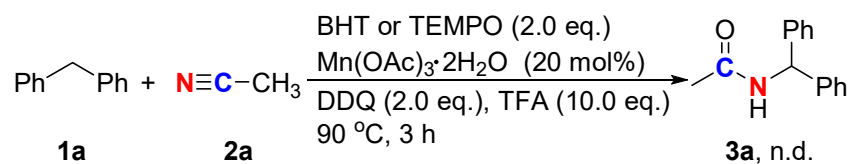

An oven-dried 25 mL Schlenk tube, which was equipped with a magnetic stir bar and charged with  $\text{Mn}(\text{OAc})_3\cdot 2\text{H}_2\text{O}$  (20 mol%), DDQ (2.0 equiv.) and BHT or TEMPO (2.0 equiv.). After charging nitrogen for three times, TFA (10.0 equiv.), diphenylmethane **1a** (0.2 mmol), acetonitrile **2a** (0.5 mL) were added. Then the reaction mixture was heated to 90 °C for 3 h, the desired product was not observed, but the radical adduct of BHT with acetamide was observed. These results suggested that free-radical was involved in the reaction. The GC-MS spectra are as follows:

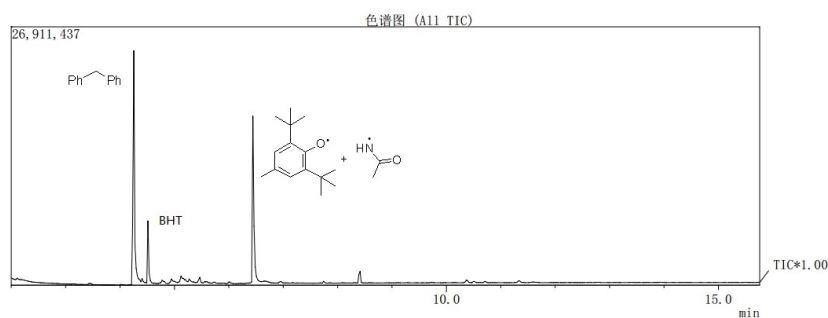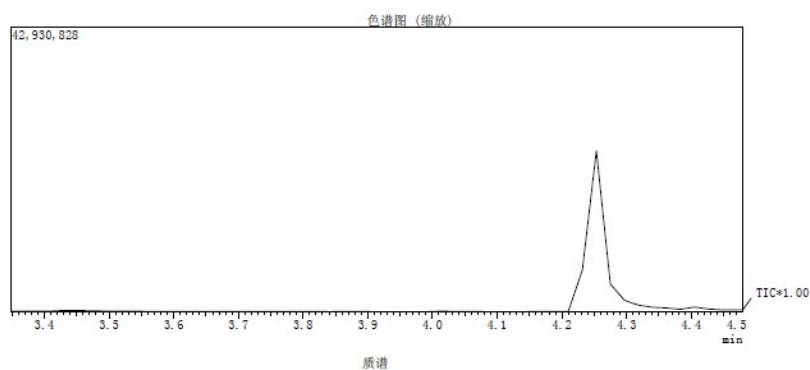

流路号:1 保留时间:4.253 (扫描数:105)  
 质量峰:128  
 原始模式:平均 4.210-4.318 (103-108) 基峰:168.05 (1024491)  
 背景模式:无 组 1 - 事件 1

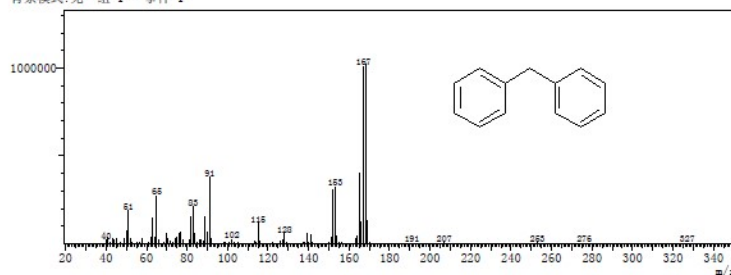

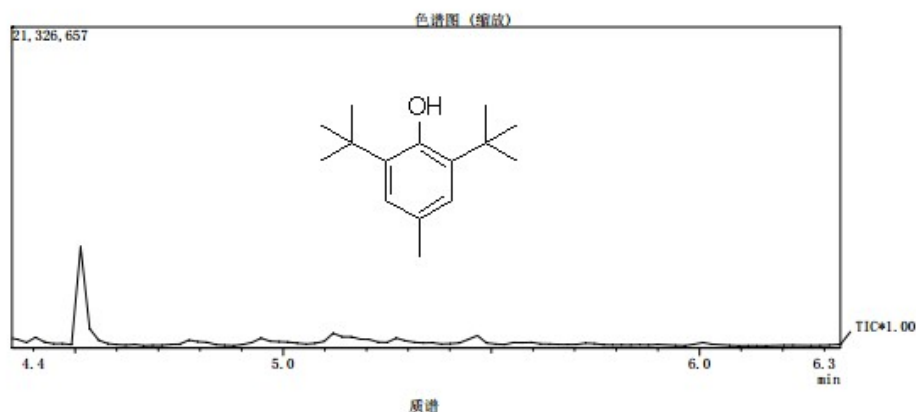

流路号:1 保留时间:4.513(扫描数:117)  
 质量峰:159  
 原始模式:平均 4.492~4.557(116~119) 基峰:205.10(255731)  
 背景模式:4.578(120) 组 1 - 事件 1

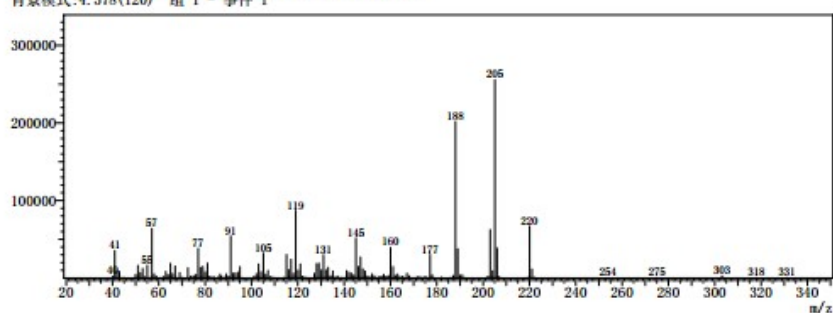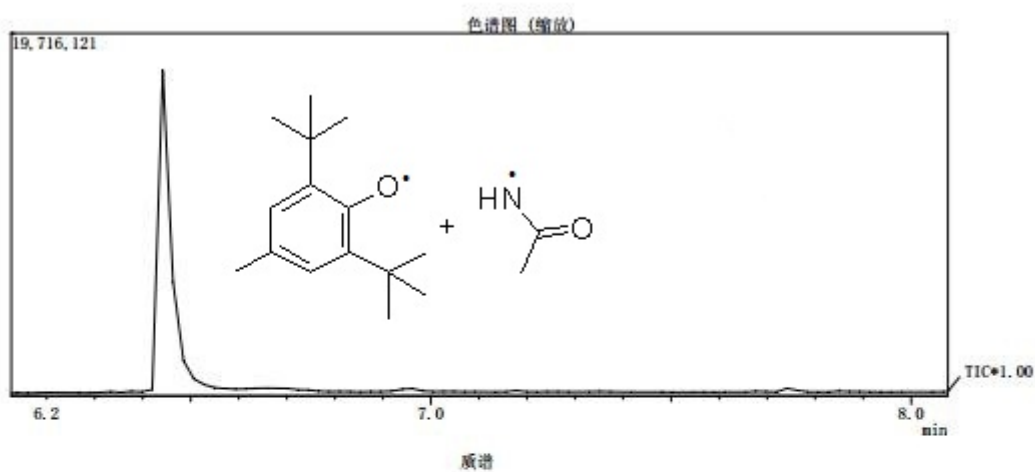

流路号:1 保留时间:6.442(扫描数:206)  
 质量峰:218  
 原始模式:平均 6.420~6.528(205~210) 基峰:203.10(803812)  
 背景模式:6.420(205) 组 1 - 事件 1

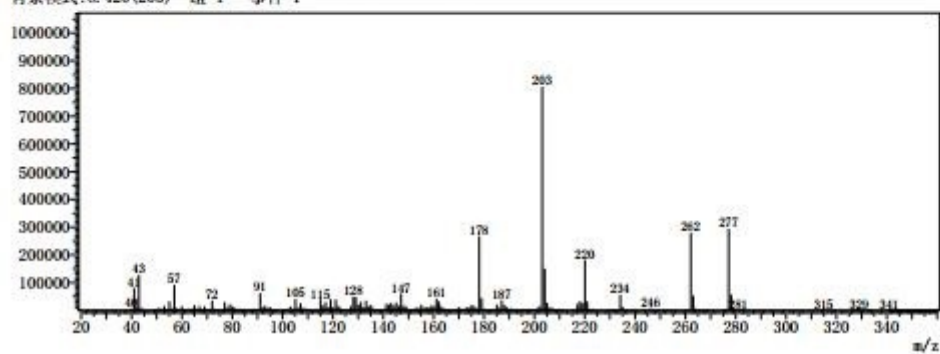

### c) Kinetic Isotopic Effect Experiments

#### Procedure for intermolecular KIE:

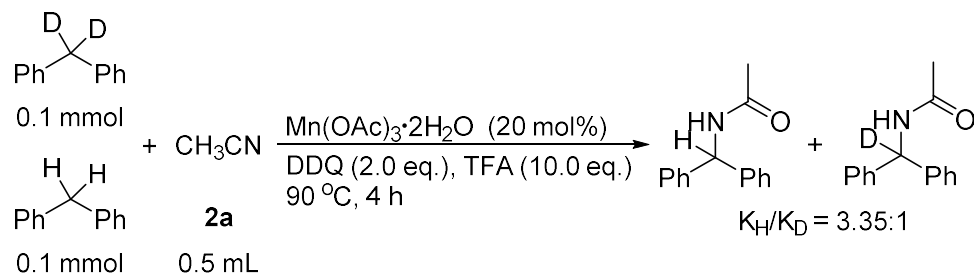

An oven-dried 25 mL Schlenk tube, which was equipped with a magnetic stir bar and charged with  $\text{Mn(OAc)}_3 \cdot 2\text{H}_2\text{O}$  (0.04 mmol), DDQ (0.4 mmol). After charging nitrogen for three times, di-deuterated diphenylmethane (0.1 mmol), diphenylmethane (0.1 mmol), acetonitrile (0.5 mL), and TFA (10.0 equiv.) were added. Then the reaction mixture was heated to 90 °C for 4 h. Then the reaction mixture was cooled down to room temperature, and neutralized by  $\text{K}_2\text{CO}_3$ . The crude product was extracted with diethyl ether, dried over anhydrous  $\text{Na}_2\text{SO}_4$  and concentrated under vacuum. The residue was purified by column chromatography on silica gel and eluted with petroleum/ethyl acetate to afford the desired product in a 27% yield.

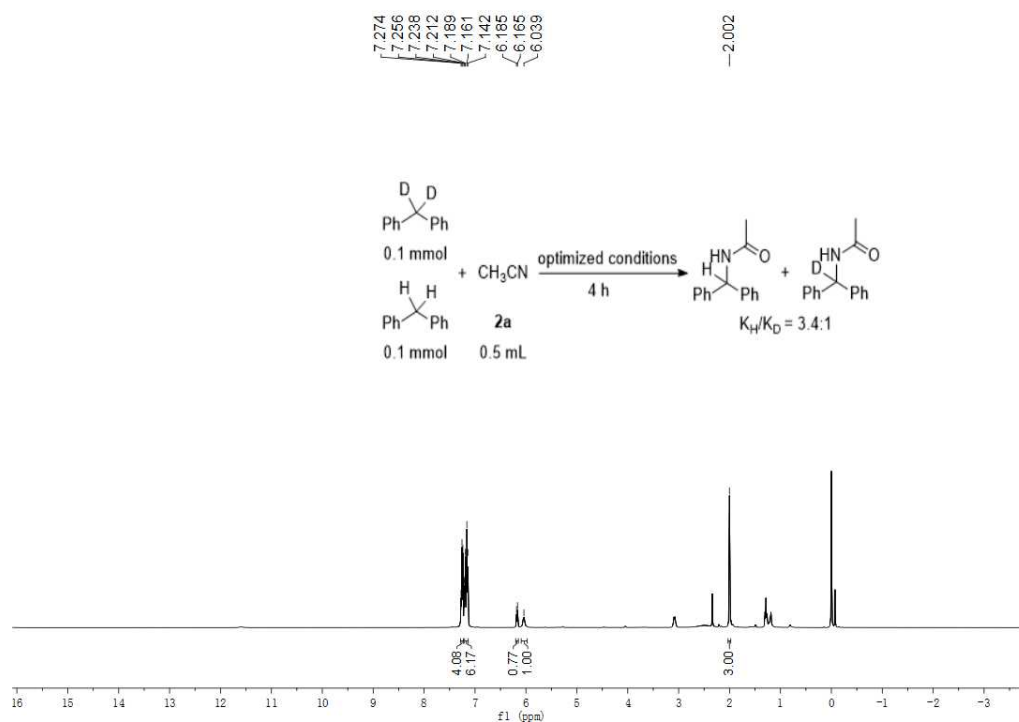

### Procedure for intramolecular KIE:

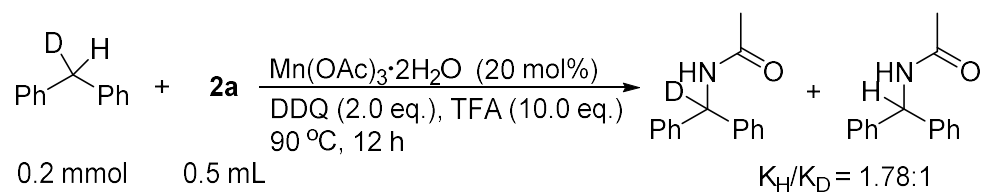

An oven-dried 25 mL Schlenk tube, which was equipped with a magnetic stir bar and charged with  $\text{Mn(OAc)}_3 \cdot 2\text{H}_2\text{O}$  (0.04 mmol), DDQ (0.4 mmol), after charging nitrogen for three times, mono-deuterated diphenylmethane (0.2 mmol), acetonitrile (0.5 mL), and TFA (10.0 equiv.) were added. Then the reaction mixture was heated to 90 °C for 12 h. Then the reaction mixture was cooled down to room temperature, and neutralized by  $\text{K}_2\text{CO}_3$ . The crude product was extracted with diethyl ether, dried over anhydrous  $\text{Na}_2\text{SO}_4$  and concentrated under vacuum. The residue was purified by column chromatography on silica gel and eluted with petroleum/ethyl acetate to afford the desired product in a 75% yield.

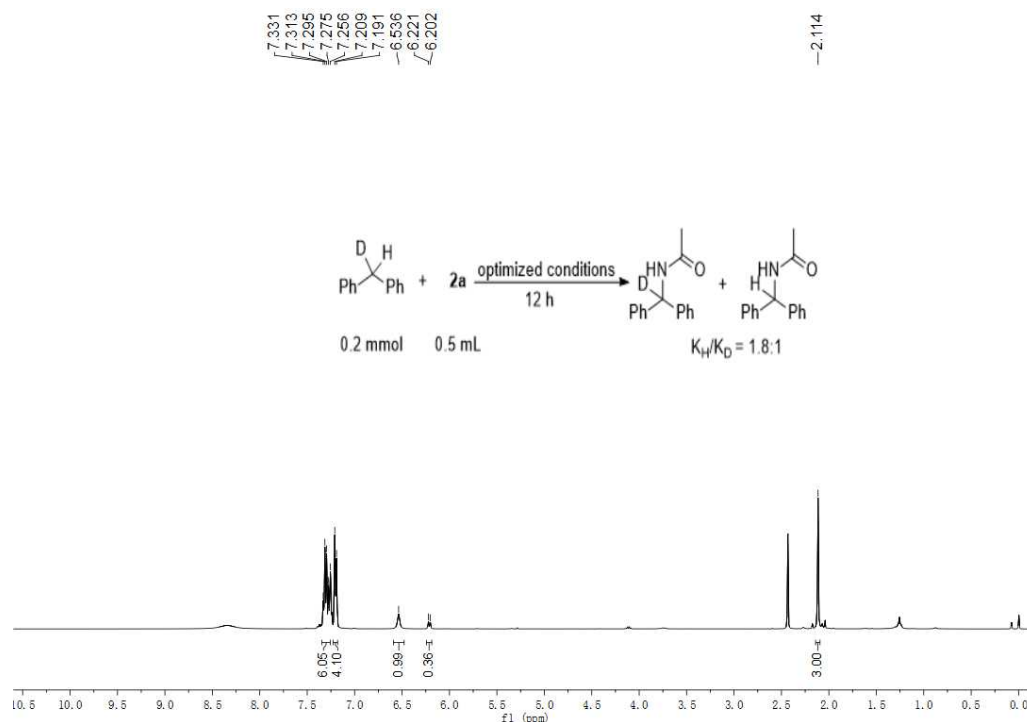

### 3. Characterization Data for the Products

#### N-benzhydrylacetamide (**3a**)<sup>1</sup>

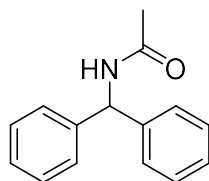

The title compound was prepared according to the general procedure and purified by column chromatography on silica gel and eluted with petroleum ether/ethyl acetate (10/1–1/1) to afford a white solid. Yield: 90%; mp 147–149 °C ; <sup>1</sup>H NMR (400 MHz, CDCl<sub>3</sub>): δ 7.34–7.26 (m, 6H), 7.22 (d, *J* = 7.2 Hz, 4H), 6.24 (d, *J* = 8.0 Hz, 1H), 6.09 (d, *J* = 6.0 Hz, 1H), 2.06 (s, 3H); <sup>13</sup>C NMR (100 MHz, CDCl<sub>3</sub>): δ 169.1, 141.4, 128.6, 127.4, 127.3, 57.0, 23.3.

#### N-(phenyl(o-tolyl)methyl)acetamide (**3b**)<sup>2</sup>

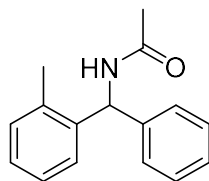

The title compound was prepared according to the general procedure and purified by column chromatography on silica gel and eluted with petroleum ether/ethyl acetate (10/1–1/1) to afford a white solid. Yield 81%; mp 130–132 °C ; <sup>1</sup>H NMR (400 M, CDCl<sub>3</sub>): δ 7.31–7.27 (m, 2H), 7.24–7.13 (m, 6H), 7.10–7.08 (m, 1H), 6.39 (d, *J* = 8.0 Hz, 1H), 6.13 (s, 1H), 2.27 (s, 3H), 2.00 (s, 3H); <sup>13</sup>C NMR (100 MHz, CDCl<sub>3</sub>): δ 168.9, 141.0, 139.4, 136.2, 130.7, 128.5, 127.4, 127.4, 127.3, 126.6, 126.1, 53.9, 23.1, 19.4.

#### N-(phenyl(m-tolyl)methyl)acetamide (**3c**)<sup>2</sup>

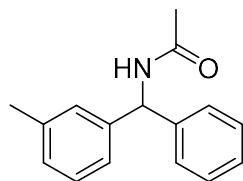

The title compound was prepared according to the general procedure and purified by column chromatography on silica gel and eluted with petroleum ether/ethyl acetate (10/1–1/1) to afford a white solid. Yield 83%; mp 99–101 °C ; <sup>1</sup>H NMR (400 M, CDCl<sub>3</sub>): δ 7.40–7.27 (m, 6H), 7.15–7.06 (m, 3H), 7.25–6.27 (m, 2H), 2.38 (s, 3H), 2.10 (s,

3H);  $^{13}\text{C}$  NMR (100 MHz,  $\text{CDCl}_3$ ):  $\delta$  169.2, 141.5, 141.3, 138.3, 128.5, 128.5, 128.2, 128.1, 127.3, 127.3, 124.3, 57.0, 23.2, 21.4.

**N-(phenyl(p-tolyl)methyl)acetamide (3d)<sup>2</sup>**

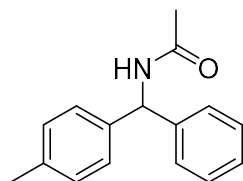

The title compound was prepared according to the general procedure and purified by column chromatography on silica gel and eluted with petroleum ether/ethyl acetate (10/1–1/1) to afford a white solid. Yield: 88%; mp 126–128 °C.  $^1\text{H}$  NMR (400 M,  $\text{CDCl}_3$ ):  $\delta$  7.33–7.27 (m, 3H), 7.22–7.20 (m, 2H), 7.14–7.09 (m, 4H), 6.20 (d,  $J$  = 8.0 Hz, 1H), 6.12 (d,  $J$  = 6.8 Hz, 1H), 2.32 (s, 3H), 2.04 (s, 3H);  $^{13}\text{C}$  NMR (100 MHz,  $\text{CDCl}_3$ ):  $\delta$  169.1, 141.5, 138.5, 137.1, 129.3, 128.5, 127.3, 127.3, 127.2, 56.7, 23.3, 21.0.

**N-((4-fluorophenyl)(phenyl)methyl)acetamide (3e)<sup>2</sup>**

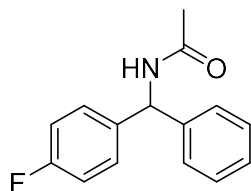

The title compound was prepared according to the general procedure and purified by column chromatography on silica gel and eluted with petroleum ether/ethyl acetate (10/1–1/1) to afford a white solid. Yield 85%; mp 147–149 °C;  $^1\text{H}$  NMR (400 M,  $\text{CDCl}_3$ ):  $\delta$  7.33–7.26 (m, 3H), 7.19–7.15 (m, 4H), 7.01–6.96 (m, 2H), 6.35 (d,  $J$  = 7.2 Hz, 1H), 6.19 (d,  $J$  = 7.6 Hz, 1H), 2.02 (s, 3H);  $^{13}\text{C}$  NMR (100 MHz,  $\text{CDCl}_3$ ):  $\delta$  169.5, 162.0 (d,  $J_{\text{C-F}}$  = 244.7 Hz), 141.1, 137.1 (d,  $J_{\text{C-F}}$  = 3.2 Hz), 128.9 (d,  $J_{\text{C-F}}$  = 8.1 Hz), 128.7, 127.6, 127.3, 115.4 (d,  $J_{\text{C-F}}$  = 21.4 Hz), 56.4, 23.1.

**N-((4-chlorophenyl)(phenyl)methyl)acetamide (3f)<sup>2</sup>**

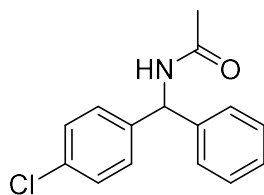

The title compound was prepared according to the general procedure and purified by column chromatography on silica gel and eluted with petroleum ether/ethyl acetate (10/1–1/1) to afford a white solid. Yield 93%; mp



133–135 °C; <sup>1</sup>H NMR (400 M, CDCl<sub>3</sub>): δ 7.34–7.26 (m, 5H), 7.18–7.13 (m, 4H), 6.25 (d, *J* = 6.8 Hz, 1H), 6.18 (d, *J* = 7.6 Hz, 1H), 2.05 (s, 3H); <sup>13</sup>C NMR (100 MHz, CDCl<sub>3</sub>): δ 169.3, 140.8, 139.8, 133.2, 128.8, 128.7, 128.6, 127.7, 127.4, 56.5, 23.2.

**N-((4-chlorophenyl)(m-tolyl)methyl)acetamide (3g)**

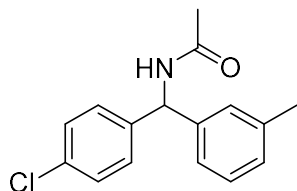

The title compound was prepared according to the general procedure and purified by column chromatography on silica gel and eluted with petroleum ether/ethyl acetate (10/1–1/1) to afford a white solid. Yield 76%; mp 187–189 °C; <sup>1</sup>H NMR (400 M, CDCl<sub>3</sub>): δ 7.29 (s, 1H), 7.27 (s, 1H), 7.22 (t, *J* = 7.6 Hz, 1H), 7.15 (d, *J* = 8.4 Hz, 2H), 7.09 (d, *J* = 7.6 Hz, 1H), 6.99–6.96 (m, 2H), 6.16 (d, *J* = 8.0 Hz, 1H), 6.02 (s, 1H), 2.31 (s, 3H), 2.00 (s, 3H); <sup>13</sup>C NMR (100 MHz, CDCl<sub>3</sub>): δ 169.2, 140.9, 140.1, 138.5, 133.0, 128.6 (2), 128.6, 128.4, 128.1, 124.4, 56.4, 23.2, 21.3. HRMS (EI) *m/z*: [M]<sup>+</sup> calcd. for C<sub>16</sub>H<sub>16</sub>ClNO 273.0920; found: 273.0910.

**N-((4-chlorophenyl)(p-tolyl)methyl)acetamide (3h)**

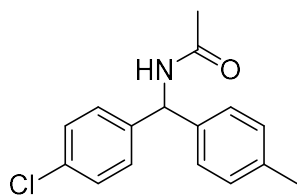

The title compound was prepared according to the general procedure and purified by column chromatography on silica gel and eluted with petroleum ether/ethyl acetate (10/1–1/1) to afford a white solid. Yield 85%; mp 162–164 °C; <sup>1</sup>H NMR (400 M, CDCl<sub>3</sub>): δ 7.27 (d, *J* = 8.4 Hz, 2H), 7.15–7.12 (m, 4H), 7.07 (d, *J* = 8.0 Hz, 2H), 6.16–6.14 (m, 2H), 2.32 (s, 3H), 2.03 (s, 3H); <sup>13</sup>C NMR (100 MHz, CDCl<sub>3</sub>): δ 169.1, 140.1, 138.0, 137.5, 133.1, 129.4, 128.6, 128.5, 127.3, 56.2, 23.2, 21.0. HRMS (EI) *m/z*: [M]<sup>+</sup> calcd. for C<sub>16</sub>H<sub>16</sub>ClNO 273.0920; found: 273.0910.

**N-(bis(4-fluorophenyl)methyl)acetamide (3i)<sup>1</sup>**

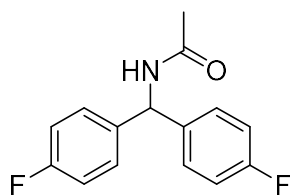

The title compound was prepared according to the general procedure and purified by column chromatography on

silica gel and eluted with petroleum ether/ethyl acetate (10/1–1/1) to afford a white solid. Yield 86%; mp 160–162 °C;  $^1\text{H}$  NMR (400 M,  $\text{CDCl}_3$ ):  $\delta$  7.17–7.14 (m, 4H), 7.03–6.99 (m, 4H), 6.19 (d,  $J$  = 8.0 Hz, 1H), 6.05 (d,  $J$  = 5.6 Hz, 1H), 2.05 (s, 3H);  $^{13}\text{C}$  NMR (100 MHz,  $\text{CDCl}_3$ ):  $\delta$  169.1, 162.1 (d,  $J_{\text{C-F}}$  = 245.0 Hz), 137.0 (d,  $J_{\text{C-F}}$  = 3.1 Hz), 128.9 (d,  $J_{\text{C-F}}$  = 8.1 Hz), 115.6 (d,  $J_{\text{C-F}}$  = 21.4 Hz), 55.7, 23.2.

**N-((4-chlorophenyl)(3-methoxyphenyl)methyl)acetamide (3f)**

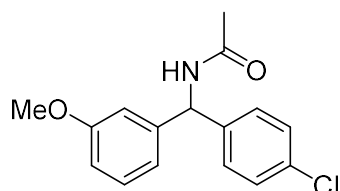

The title compound was prepared according to the general procedure and purified by column chromatography on silica gel and eluted with petroleum ether/ethyl acetate (10/1–1/1) to afford a white solid. Yield 75%; mp 176–178 °C;  $^1\text{H}$  NMR (400 M,  $\text{CDCl}_3$ ):  $\delta$  7.23–7.19 (m, 3H), 7.12 (d,  $J$  = 8.0 Hz, 2H), 6.79–6.70 (m, 3H), 6.29 (br, 1H), 6.11 (d,  $J$  = 7.6 Hz, 1H), 3.73 (s, 3H), 2.02 (s, 3H);  $^{13}\text{C}$  NMR (100 MHz,  $\text{CDCl}_3$ ):  $\delta$  169.6, 159.8, 142.3, 139.7, 133.2, 129.8, 128.7, 128.6, 119.6, 113.5, 112.6, 56.5, 55.2, 23.1. HRMS (EI)  $m/z$ :  $[\text{M}]^+$  calcd. for  $\text{C}_{16}\text{H}_{16}\text{ClNO}_2$  289.0870; found: 289.0858.

**N-(1-phenylethyl)acetamide (3k)<sup>1</sup>**

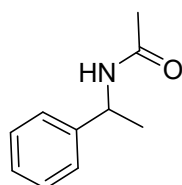

The title compound was prepared according to the general procedure and purified by column chromatography on silica gel and eluted with petroleum ether/ethyl acetate (10/1–1/1) to afford a white solid. Yield 59%; mp 74–76 °C;  $^1\text{H}$  NMR (400 M,  $\text{CDCl}_3$ ):  $\delta$  7.27–7.18 (m, 5H), 5.83 (s, 1H), 5.07–4.99 (m, 1H), 1.89 (s, 3H), 1.40 (d,  $J$  = 6.8 Hz, 3H);  $^{13}\text{C}$  NMR (100 MHz,  $\text{CDCl}_3$ ):  $\delta$  169.2, 143.0, 128.6, 127.3, 126.1, 48.8, 23.3, 21.6.

**N-(1,2,3,4-tetrahydronaphthalen-1-yl)acetamide (3l)<sup>3</sup>**

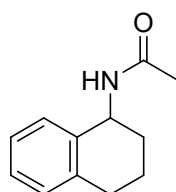

The title compound was prepared according to the general procedure and purified by column chromatography on silica gel and eluted with petroleum ether/ethyl acetate (10/1–1/1) to afford a white solid. Yield 55%; mp

145–147 °C; <sup>1</sup>H NMR (400 M, CDCl<sub>3</sub>): δ 7.16–7.09 (m, 4H), 5.80 (br, 1H), 5.16–5.14 (m, 1H), 2.77–2.76 (m, 2H), 2.02–1.99 (m, 4H), 1.81 (br, 3H); <sup>13</sup>C NMR (100 MHz, CDCl<sub>3</sub>): δ 169.2, 137.5, 136.6, 129.1, 128.6, 127.2, 126.1, 47.3, 30.0, 29.1, 23.4, 19.8.

**N-(2,3-dihydro-1H-inden-1-yl)acetamide (3m)**<sup>4</sup>

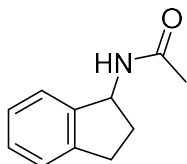

The title compound was prepared according to the general procedure and purified by column chromatography on silica gel and eluted with petroleum ether/ethyl acetate (10/1–1/1) to afford a off white solid. Yield 75%; mp 206–208 °C; <sup>1</sup>H NMR (400 M, CDCl<sub>3</sub>): δ 7.18–7.08 (m, 4H), 5.99(br, 1H), 5.34–5.28 (m, 1H), 2.90–2.83 (m, 1H), 2.78–2.70 (m, 1H), 2.49–2.40 (m, 1H), 1.89 (s, 3H), 1.73–1.64 (m, 1H); <sup>13</sup>C NMR (100 MHz, CDCl<sub>3</sub>): δ 170.0, 143.2, 143.1, 127.9, 126.7, 124.7, 124.0, 54.7, 33.9, 30.2, 23.3.

**N-(2-methyl-1-phenylpropyl)acetamide (3n)**<sup>1</sup>

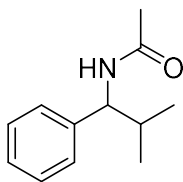

The title compound was prepared according to the general procedure and purified by column chromatography on silica gel and eluted with petroleum ether/ethyl acetate (10/1–1/1) to afford a white solid. Yield 20%; mp 115–117 °C; <sup>1</sup>H NMR (400 M, CDCl<sub>3</sub>): δ 7.33–7.29 (m, 2H), 7.24–7.21 (m, 3H), 5.74 (d, *J* = 7.6 Hz, 1H), 4.75 (t, *J* = 8.4 Hz, 1H), 2.05–2.01 (m, 1H), 1.99 (s, 3H), 0.96 (d, *J* = 6.8 Hz, 3H), 0.82 (d, *J* = 6.8 Hz, 3H); <sup>13</sup>C NMR (100 MHz, CDCl<sub>3</sub>): δ 169.2, 141.5, 128.4, 127.1, 126.9, 59.1, 33.3, 23.5, 19.7, 18.8.

**N-((4-ethylphenyl)(phenyl)methyl)acetamide (3o)**

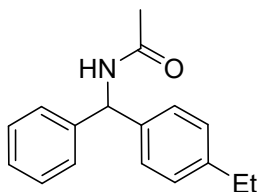

The title compound was prepared according to the general procedure and purified by column chromatography on silica gel and eluted with petroleum ether/ethyl acetate (10/1–1/1) to afford a pale yellow solid. Yield 63%; mp 133–135 °C; <sup>1</sup>H NMR (400 M, CDCl<sub>3</sub>): δ 7.33–7.27 (m, 3H), 7.22 (d, *J* = 7.6 Hz, 2H), 7.16–7.11 (m, 4H), 6.21 (d,

$J = 8.0$  Hz, 1H), 6.08 (d,  $J = 7.2$  Hz, 1H), 2.62 (q,  $J = 15.2$  Hz, 7.6 Hz, 2H), 2.05 (s, 3H), 1.22 (t,  $J = 7.6$  Hz, 3H);  $^{13}\text{C}$  NMR (100 MHz,  $\text{CDCl}_3$ ):  $\delta$  169.0, 143.5, 141.6, 138.7, 128.5, 128.1, 127.4, 127.3, 127.2, 56.7, 28.4, 23.3, 15.4. HRMS (EI)  $m/z$ :  $[\text{M}]^+$  calcd. for  $\text{C}_{17}\text{H}_{19}\text{NO}$  253.1467; found: 253.1451.

**N-(9H-fluoren-9-yl)acetamide (3p)<sup>1</sup>**

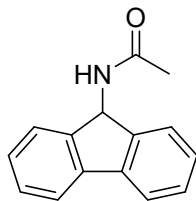

The title compound was prepared according to the general procedure and purified by column chromatography on silica gel and eluted with petroleum ether/ethyl acetate (10/1–1/1) to afford a white solid. Yield 48%; mp 255–257 °C;  $^1\text{H}$  NMR (400 M,  $\text{CDCl}_3$ ):  $\delta$  7.61 (d,  $J = 7.2$  Hz, 2H), 7.49 (d,  $J = 7.6$  Hz, 2H), 7.34–7.31 (m, 2H), 7.23–7.19 (m, 2H), 6.13 (d,  $J = 8.8$  Hz, 1H), 5.79 (d,  $J = 8.0$  Hz, 1H), 2.04 (s, 3H);  $^{13}\text{C}$  NMR (100 MHz,  $\text{CDCl}_3$ ):  $\delta$  171.2, 144.0, 140.5, 128.7, 127.7, 125.1, 119.9, 54.8, 23.3.

**N-(naphthalen-1-yl(phenyl)methyl)acetamide (3q)<sup>5</sup>**

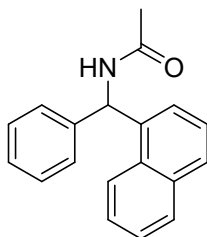

The title compound was prepared according to the general procedure and purified by column chromatography on silica gel and eluted with petroleum ether/ethyl acetate (10/1–1/1) to afford a white solid. Yield 80%; mp 228–230 °C;  $^1\text{H}$  NMR (400 M,  $\text{CDCl}_3$ ):  $\delta$  8.01–7.98 (m, 1H), 7.88–7.86 (m, 1H), 7.80 (d,  $J = 8.4$  Hz, 1H), 7.49–7.47 (m, 2H), 7.39 (t,  $J = 7.6$  Hz, 1H), 7.34–7.27 (m, 5H), 7.22 (d,  $J = 7.2$  Hz, 1H), 6.99 (d,  $J = 8.0$  Hz, 1H), 6.15 (d,  $J = 7.6$  Hz, 1H), 2.05 (s, 3H);  $^{13}\text{C}$  NMR (100 MHz,  $\text{CDCl}_3$ ):  $\delta$  168.9, 141.1, 137.1, 134.0, 131.1, 128.8, 128.6, 128.5, 127.4, 127.3, 126.6, 125.8, 125.4, 125.1, 123.7, 53.8, 23.2.

**N-(naphthalen-1-ylmethyl)acetamide (3r)<sup>6</sup>**

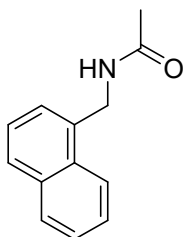

The title compound was prepared according to the general procedure and purified by column chromatography on silica gel and eluted with petroleum ether/ethyl acetate (10/1–1/1) to afford a white solid. Yield 45%; mp 124–126 °C;  $^1\text{H}$  NMR (400 M,  $\text{CDCl}_3$ ):  $\delta$  8.00 (d,  $J$  = 8.0 Hz, 1H), 7.87 (d,  $J$  = 7.6 Hz, 1H), 7.82–7.80 (m, 1H), 7.56–7.49 (m, 2H), 7.42–7.39 (m, 2H), 5.78 (s, 1H), 4.86 (d,  $J$  = 5.2 Hz, 2H), 1.98 (s, 3H);  $^{13}\text{C}$  NMR (100 MHz,  $\text{CDCl}_3$ ):  $\delta$  169.6, 133.8, 133.4, 131.3, 128.7, 128.6, 126.7, 126.6, 126.0, 125.3, 123.4, 41.8, 23.1.

### N-benzhydrylpentanamide (**3s**)<sup>7</sup>

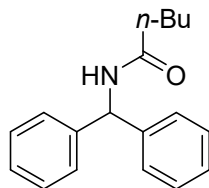

The title compound was prepared according to the general procedure and purified by column chromatography on silica gel and eluted with petroleum ether/ethyl acetate (10/1–1/1) to afford a white solid. Yield 84%; mp 122–124 °C;  $^1\text{H}$  NMR (400 M,  $\text{CDCl}_3$ ):  $\delta$  7.23–7.12 (m, 10H), 6.17 (d,  $J$  = 8.0 Hz, 1H), 6.08 (br, 1H), 2.19–2.15 (m, 2H), 1.60–1.52 (m, 2H), 1.31–1.24 (m, 2H), 0.83 (t,  $J$  = 7.2 Hz, 3H);  $^{13}\text{C}$  NMR (100 MHz,  $\text{CDCl}_3$ ):  $\delta$  172.3, 141.5, 128.6, 127.3, 127.3, 56.8, 36.4, 27.7, 22.3, 13.7.

### N-benzhydrylisobutyramide (**3t**)<sup>8</sup>

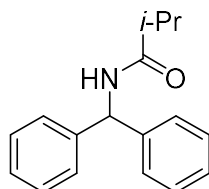

The title compound was prepared according to the general procedure and purified by column chromatography on silica gel and eluted with petroleum ether/ethyl acetate (10/1–1/1) to afford a white solid. Yield 75%; mp 143–145 °C;  $^1\text{H}$  NMR (400 M,  $\text{CDCl}_3$ ):  $\delta$  7.35–7.31 (m, 4H), 7.29–7.27 (m, 2H), 7.23–7.21 (m, 4H), 6.25 (d,  $J$  = 8.0 Hz, 1H), 6.10 (d,  $J$  = 6.4 Hz, 1H), 2.49–2.39 (m, 1H), 1.20 (d,  $J$  = 6.8 Hz, 6H);  $^{13}\text{C}$  NMR (100 MHz,  $\text{CDCl}_3$ ):  $\delta$  175.8, 141.6, 128.6, 127.3, 127.3, 56.6, 35.6, 19.5.

### N-benzhydrylpivalamide (**3u**)<sup>9</sup>

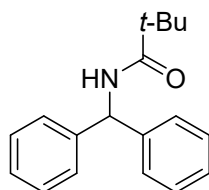

The title compound was prepared according to the general procedure and purified by column chromatography on silica gel and eluted with petroleum ether/ethyl acetate (10/1–1/1) to afford a white solid. Yield 51%; mp

152–154 °C;  $^1\text{H}$  NMR (400 M,  $\text{CDCl}_3$ ):  $\delta$  7.34–7.26 (m, 6H), 7.24–7.19 (m, 4H), 6.21 (d,  $J$  = 7.2 Hz, 1H), 6.18 (br, 1H), 1.24 (s, 9H);  $^{13}\text{C}$  NMR (100 MHz,  $\text{CDCl}_3$ ):  $\delta$  177.3, 141.7, 128.6, 127.3, 127.2, 56.7, 38.7, 27.5.

**N-benzhydrylcyclopropanecarboxamide (3v)**<sup>7</sup>

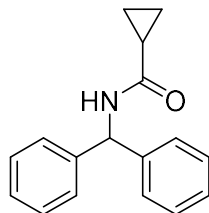

The title compound was prepared according to the general procedure and purified by column chromatography on silica gel and eluted with petroleum ether/ethyl acetate (10/1–1/1) to afford a white solid. Yield 90%; mp 173–175 °C;  $^1\text{H}$  NMR (400 M,  $\text{CDCl}_3$ ):  $\delta$  7.35–7.33 (m, 4H), 7.30–7.25 (m, 6H), 6.27 (br, 2H), 1.44 (br, 1H), 1.02 (br, 2H), 0.78–0.77 (m, 2H);  $^{13}\text{C}$  NMR (100 MHz,  $\text{CDCl}_3$ ):  $\delta$  172.5, 141.6, 128.6, 127.4 (2), 57.0, 14.8, 7.3.

**N-benzhydrylacrylamide (3w)**<sup>10</sup>

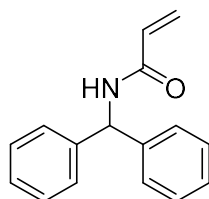

The title compound was prepared according to the general procedure and purified by column chromatography on silica gel and eluted with petroleum ether/ethyl acetate (10/1–1/1) to afford a white solid. Yield 96%; mp 179–181 °C;  $^1\text{H}$  NMR (400 M,  $\text{CDCl}_3$ ):  $\delta$  7.33–7.27 (m, 5H), 7.23–7.21 (m, 5H), 6.35–6.30 (m, 2H), 6.18–6.09 (m, 2H), 5.67 (d,  $J$  = 10.4 Hz, 1H);  $^{13}\text{C}$  NMR (100 MHz,  $\text{CDCl}_3$ ):  $\delta$  164.2, 140.9, 130.1, 128.3, 127.2, 127.1, 127.0, 56.7.

**N-benzhydrylcinnamamide (3x)**<sup>8</sup>

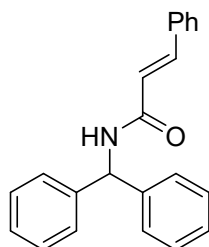

The title compound was prepared according to the general procedure and purified by column chromatography on silica gel and eluted with petroleum ether/ethyl acetate (10/1–1/1) to afford a white solid. Yield 93%; mp

178–180 °C;  $^1\text{H}$  NMR (400 M,  $\text{CDCl}_3$ ):  $\delta$  7.67 (d,  $J$  = 15.6 Hz, 1H), 7.48 (br, 2H), 7.40–7.25 (m, 13H), 6.46 (d,  $J$  = 15.6 Hz, 1H), 6.39 (d,  $J$  = 7.6 Hz, 1H), 6.17 (d,  $J$  = 7.2 Hz, 1H);  $^{13}\text{C}$  NMR (100 MHz,  $\text{CDCl}_3$ ):  $\delta$  164.9, 141.8, 141.3, 134.6, 129.7, 128.8, 128.7, 127.8, 127.5, 127.4, 120.1, 57.2.

**N-(1-phenylethyl)acrylamide (3y)<sup>10</sup>**

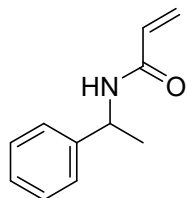

The title compound was prepared according to the general procedure and purified by column chromatography on silica gel and eluted with petroleum ether/ethyl acetate (10/1–1/1) to afford a white solid. Yield 40%; mp 63–65 °C;  $^1\text{H}$  NMR (400 M,  $\text{CDCl}_3$ ):  $\delta$  7.32–7.25 (m, 5H), 6.28 (d,  $J$  = 17.2 Hz, 1H), 6.11–6.04 (m, 1H), 5.88 (br, 1H), 5.63 (d,  $J$  = 10.0 Hz, 1H), 5.24–5.17 (m, 1H), 1.52 (d,  $J$  = 6.8 Hz, 3H);  $^{13}\text{C}$  NMR (100 MHz,  $\text{CDCl}_3$ ):  $\delta$  164.7, 142.7, 130.6, 128.6, 127.4, 126.8, 126.1, 48.8, 21.5.

**N-benzhydryl-2-phenylacetamide (3z)<sup>11</sup>**

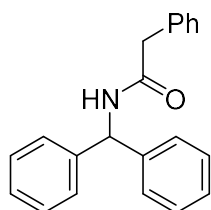

The title compound was prepared according to the general procedure and purified by column chromatography on silica gel and eluted with petroleum ether/ethyl acetate (10/1–1/1) to afford a white solid. Yield 70%; mp 138–140 °C;  $^1\text{H}$  NMR (400 M,  $\text{CDCl}_3$ ):  $\delta$  7.37–7.27 (m, 9H), 7.24–7.23 (m, 2H), 7.08 (d,  $J$  = 7.2 Hz, 4H), 6.23 (d,  $J$  = 8.4 Hz, 1H), 6.05 (d,  $J$  = 4.0 Hz, 1H), 3.64 (s, 2H);  $^{13}\text{C}$  NMR (100 MHz,  $\text{CDCl}_3$ ):  $\delta$  170.1, 141.2, 134.6, 129.3, 129.0, 128.6, 127.4, 127.4, 127.1, 56.8, 43.8.

**N-((4-chlorophenyl)(phenyl)methyl)-2-phenylacetamide (3za)**

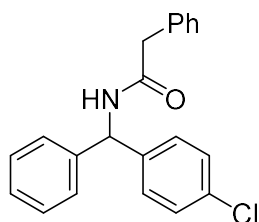

The title compound was prepared according to the general procedure and purified by column chromatography on

silica gel and eluted with petroleum ether/ethyl acetate (10/1–1/1) to afford a white solid. Yield 70%; mp 133–135 °C;  $^1\text{H}$  NMR (400 M,  $\text{CDCl}_3$ ):  $\delta$  7.37–7.27 (m, 7H), 7.22 (s, 3H), 7.05–7.00 (m, 4H), 6.19 (d,  $J$  = 8.4 Hz, 1H), 5.96 (d,  $J$  = 7.6 Hz, 1H), 3.63 (s, 2H);  $^{13}\text{C}$  NMR (100 MHz,  $\text{CDCl}_3$ ):  $\delta$  170.0, 140.7, 139.8, 134.6, 133.2, 129.3, 129.1, 128.7, 128.7, 128.5, 127.6, 127.5, 127.2, 56.2, 43.8. HRMS (EI)  $m/z$ :  $[\text{M}]^+$  calcd. for  $\text{C}_{21}\text{H}_{18}\text{ClNO}$  335.1077; found: 335.1072.

**N-(bis(4-fluorophenyl)methyl)benzamide (3zb)<sup>12</sup>**

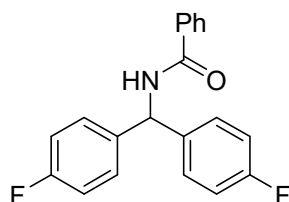

The title compound was prepared according to the general procedure and purified by column chromatography on silica gel and eluted with petroleum ether/ethyl acetate (10/1–1/1) to afford a white solid. Yield 75%; mp 177–179 °C;  $^1\text{H}$  NMR (400 M,  $\text{CDCl}_3$ ):  $\delta$  7.79 (d,  $J$  = 7.6 Hz, 2H), 7.53–7.49 (m, 1H), 7.45–7.41 (m, 2H), 7.24–7.22 (m, 4H), 7.03 (t,  $J$  = 8.4 Hz, 4H), 6.57 (d,  $J$  = 7.2 Hz, 1H), 6.40 (d,  $J$  = 7.6 Hz, 1H);  $^{13}\text{C}$  NMR (100 MHz,  $\text{CDCl}_3$ ):  $\delta$  166.4, 162.2 (d,  $J_{\text{C-F}}$  = 245.3 Hz), 136.9 (d,  $J_{\text{C-F}}$  = 3.3 Hz), 133.8, 131.9, 129.0 (d,  $J_{\text{C-F}}$  = 8.1 Hz), 128.7, 127.0, 115.7 (d,  $J_{\text{C-F}}$  = 21.5 Hz), 56.2.

**N-benzhydrylbenzamide (3zc)<sup>11</sup>**

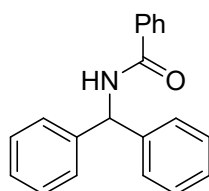

The title compound was prepared according to the general procedure and purified by column chromatography on silica gel and eluted with petroleum ether/ethyl acetate (10/1–1/1) to afford a white solid. Yield 57%; mp 168–170 °C;  $^1\text{H}$  NMR (400 M,  $\text{CDCl}_3$ ):  $\delta$  7.81 (d,  $J$  = 7.6 Hz, 2H), 7.52–7.49 (m, 1H), 7.45–7.41 (m, 2H), 7.36–7.28 (m, 10H), 6.70 (d,  $J$  = 7.2 Hz, 1H), 6.46 (d,  $J$  = 7.6 Hz, 1H);  $^{13}\text{C}$  NMR (100 MHz,  $\text{CDCl}_3$ ):  $\delta$  166.4, 141.4, 134.2, 131.6, 128.7, 128.6, 127.5, 127.4, 127.0, 57.4.

**N-benzhydryl-3-methylbenzamide (3zd)<sup>8</sup>**



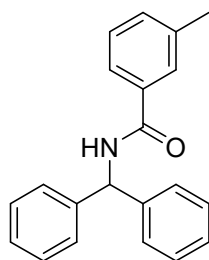

The title compound was prepared according to the general procedure and purified by column chromatography on silica gel and eluted with petroleum ether/ethyl acetate (10/1–1/1) to afford a white solid. Yield 45%; mp 151–153 °C;  $^1\text{H}$  NMR (400 M,  $\text{CDCl}_3$ ):  $\delta$  7.55 (s, 1H), 7.53–7.51 (m, 1H), 7.29–7.27 (m, 3H), 7.24–7.18 (m, 9H), 6.58 (d,  $J$  = 7.2 Hz, 1H), 6.37 (d,  $J$  = 7.6 Hz, 1H), 2.31 (s, 3H);  $^{13}\text{C}$  NMR (100 MHz,  $\text{CDCl}_3$ ):  $\delta$  166.2, 141.4, 138.5, 134.2, 132.4, 128.7, 128.4, 127.7, 127.5, 127.5, 123.9, 57.3, 21.3.

#### N-benzhydryl-4-methylbenzamide (**3ze**)<sup>8</sup>

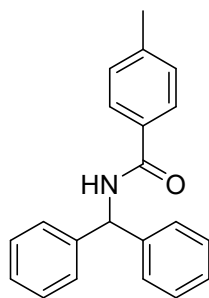

The title compound was prepared according to the general procedure and purified by column chromatography on silica gel and eluted with petroleum ether/ethyl acetate (10/1–1/1) to afford a white solid. Yield 40%; mp 174–176 °C;  $^1\text{H}$  NMR (400 M,  $\text{CDCl}_3$ ):  $\delta$  7.65 (d,  $J$  = 7.6 Hz, 2H), 7.29–7.27 (m, 3H), 7.23–7.15 (m, 9H), 6.62 (d,  $J$  = 7.2 Hz, 1H), 6.38 (d,  $J$  = 7.6 Hz, 1H), 2.32 (s, 3H);  $^{13}\text{C}$  NMR (100 MHz,  $\text{CDCl}_3$ ):  $\delta$  166.4, 142.1, 141.5, 131.3, 129.2, 128.6, 127.4 (2), 127.0, 57.3, 21.4 .

#### N-benzhydryl-4-fluorobenzamide (**3zf**)<sup>13</sup>

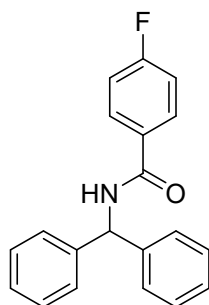

The title compound was prepared according to the general procedure and purified by column chromatography on

silica gel and eluted with petroleum ether/ethyl acetate (10/1–1/1) to afford a white solid. Yield 66%; mp 217–219 °C; <sup>1</sup>H NMR (400 M, CDCl<sub>3</sub>): δ 7.75 (dd, *J* = 7.6, 5.6 Hz, 2H), 7.29–7.27 (m, 3H), 7.22–7.18 (m, 7H), 7.04–7.00 (m, 2H), 6.59 (d, *J* = 4.0 Hz, 1H), 6.35 (d, *J* = 8.0 Hz, 1H); <sup>13</sup>C NMR (100 MHz, CDCl<sub>3</sub>): δ 166.0, 164.5 (d, *J*<sub>C-F</sub> = 189.3 Hz), 141.2, 130.3 (d, *J*<sub>C-F</sub> = 3.2 Hz), 129.3 (d, *J*<sub>C-F</sub> = 8.9 Hz), 128.7, 127.6, 127.4, 115.6 (d, *J*<sub>C-F</sub> = 21.7 Hz), 57.5.

#### 4. References

- (1) R. Sanz, A. Martínez, V. Guilarte, J. M. Álvarez-Gutiérrez, F. Rodríguez, *Eur. J. Org. Chem.*, **2007**, 28, 4642.
- (2) R. Crampton, S. Woodward, M. Fox, *Adv. Synth. Catal.*, **2011**, 353, 903.
- (3) F. Xu, Q. Wu, X. Chen, X. Lin, Q. Wu, *J. Org. Chem.*, **2015**, 24, 5393.
- (4) D. A. Evans, F. E. Michael, J. S. Tedrow, K. R. Campos, *J. Am. Chem. Soc.*, **2003**, 125, 3534.
- (5) N. Montazeri, K. Pourshamsian, M. Ghorchibeigi, M. Fouladi, *Res. J. Pharm., Biol. Chem. Sci.*, **2012**, 3, 867.
- (6) N.-M. Bi, M.-G. Ren, Q.-H. Song, *Synth. Commun.*, **2010**, 40, 2617.
- (7) M.-S. Shakeri, H. Tajik, K. Nikanm, *J. Chem. Sci.*, **2012**, 124, 1025.
- (8) H. Yu, J. Shen, *Org. Lett.*, **2014**, 16, 3204.
- (9) T. Beisel, G. Manolikakes, *Org. Lett.*, **2013**, 15, 6046.
- (10) L. Ma'mani, A. Heydari, M. Sheykhan, *Appl. Catal. A. Gen.*, **2010**, 384, 122.
- (11) J. Liu, H. Zhang, H. Yi, C. Liu, A. Lei, *Sci. China Chem.*, **2015**, 58, 1323.
- (12) M. Barbero, S. Bazzi, S. Cadamuro, S. Dughera, *Eur. J. Org. Chem.*, **2009**, 3, 430.
- (13) X.-N. Zhao, H.-C. Hu, F.-J. Zhang, Z.-H. Zhang, *Appl. Catal. A. Gen.*, **2014**, 482, 258.

## 5. Copies of $^1\text{H}$ and $^{13}\text{C}$ NMR Spectra of the Products

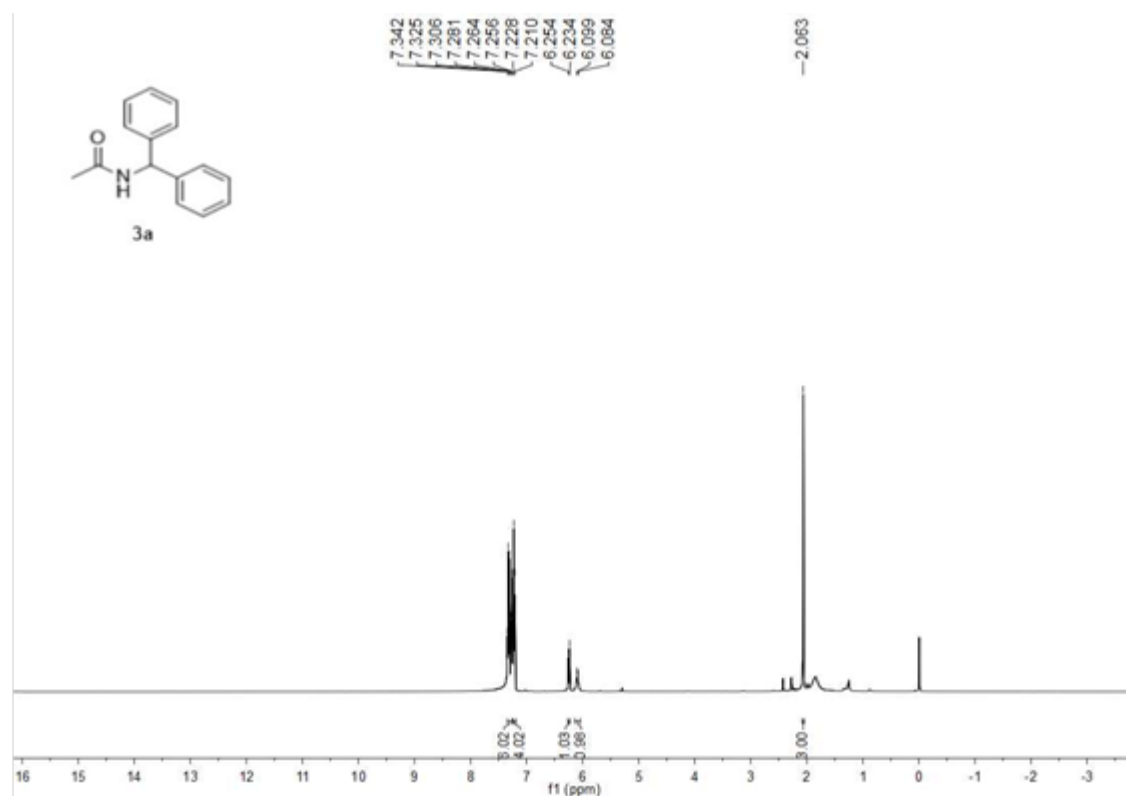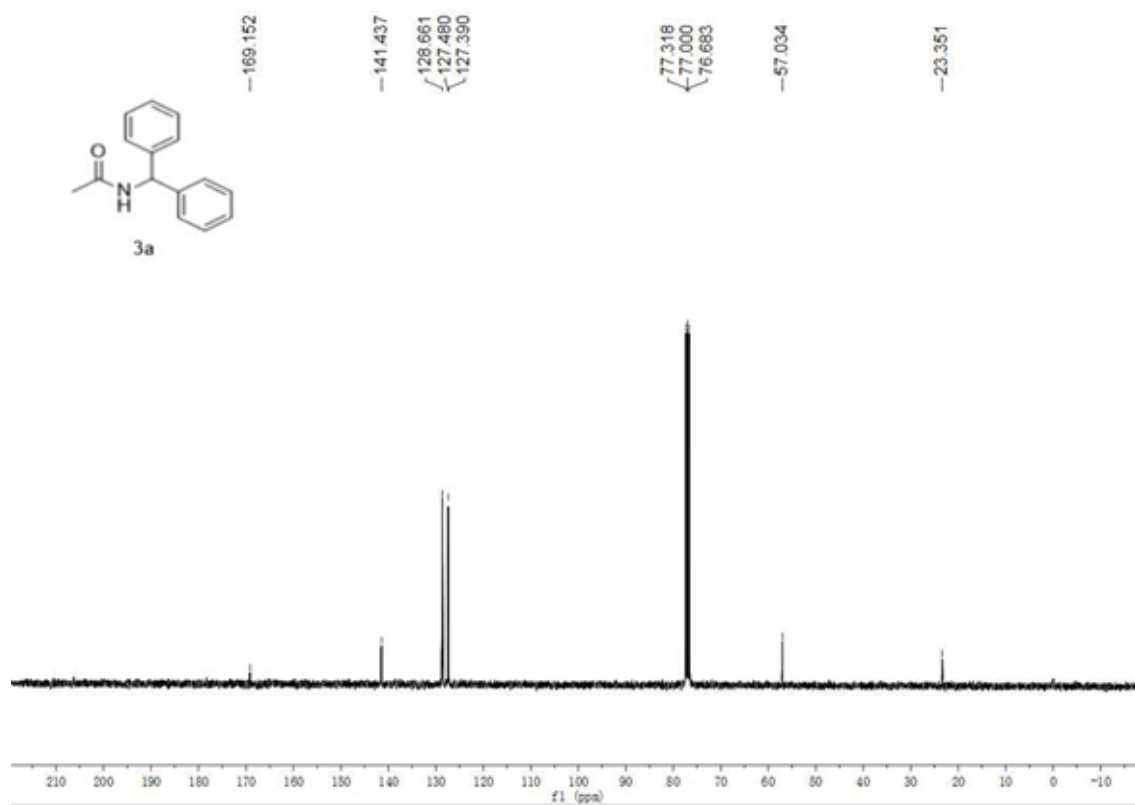

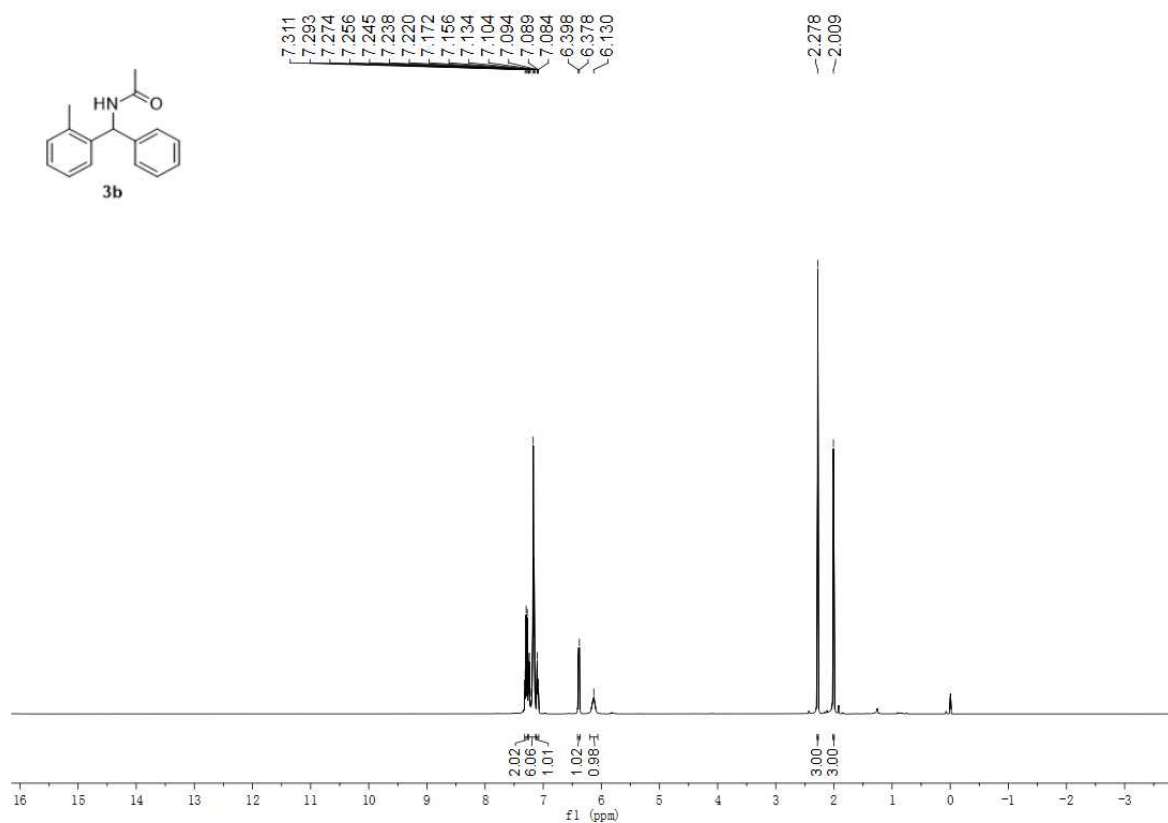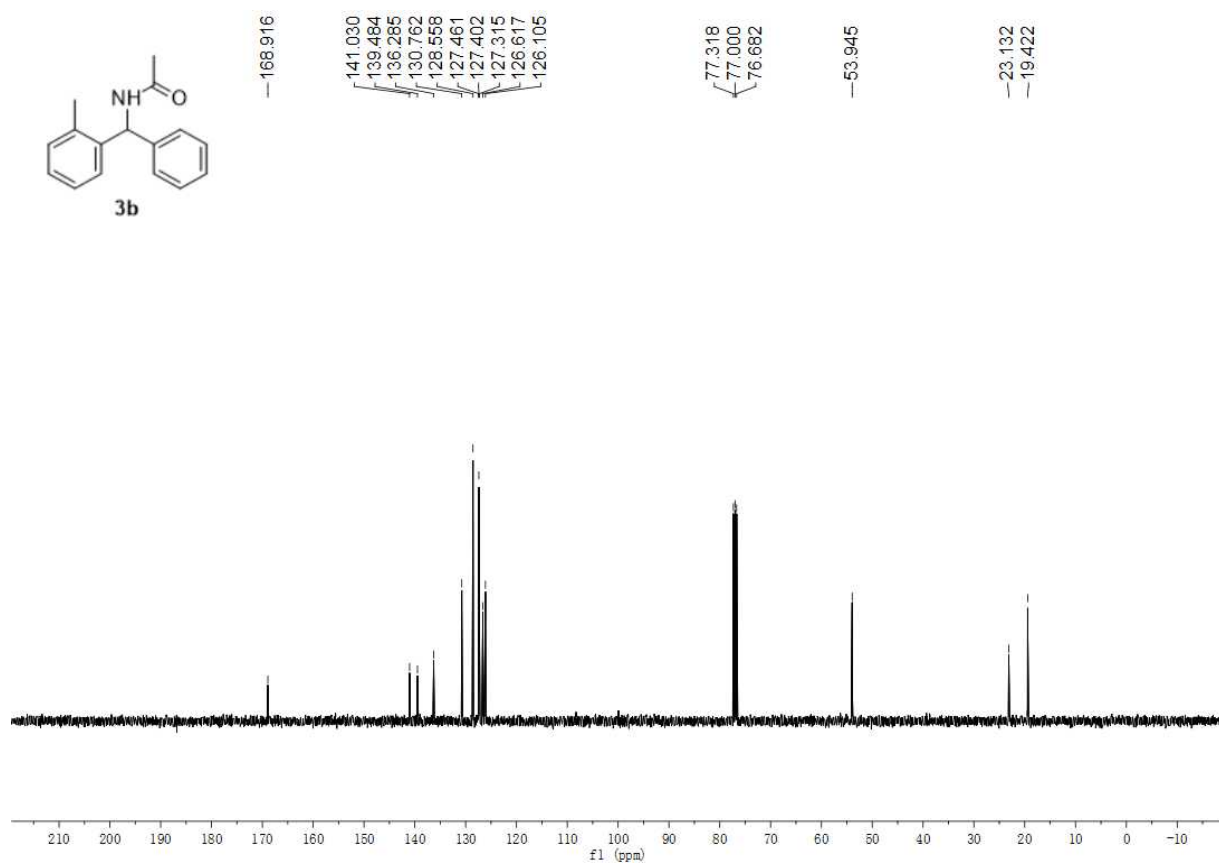

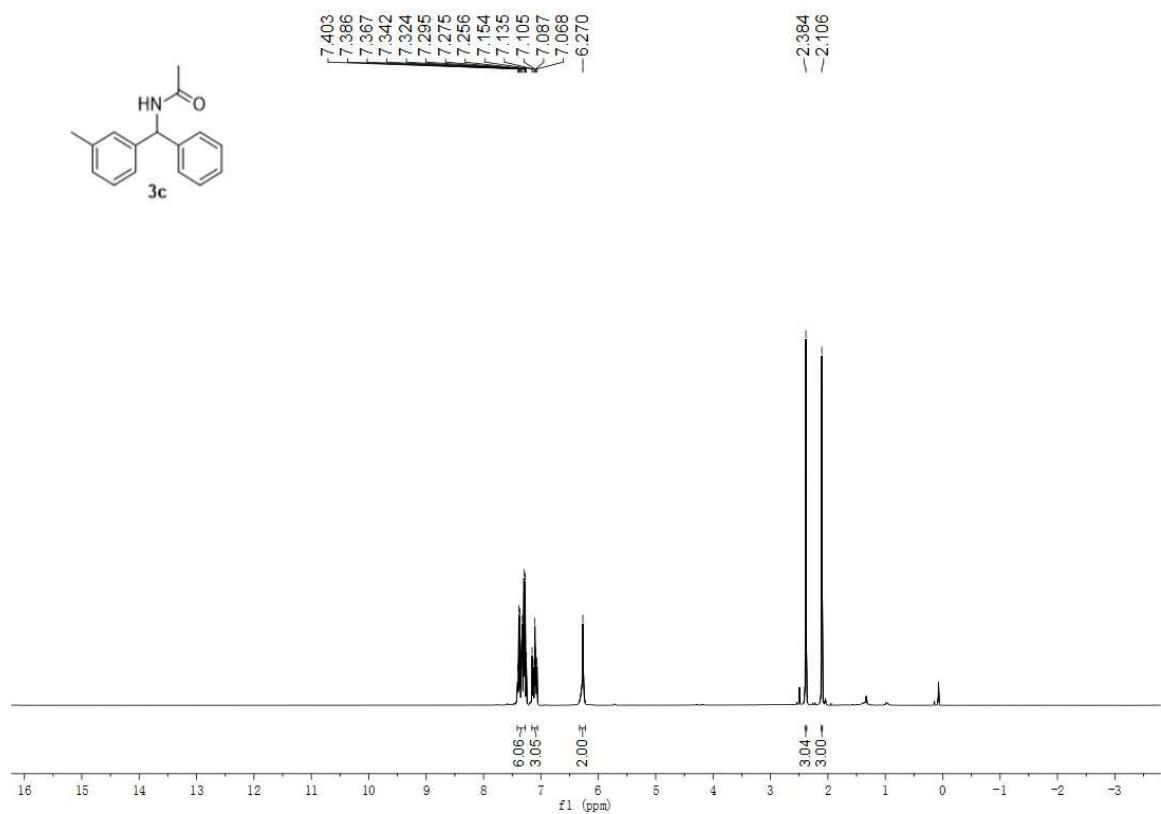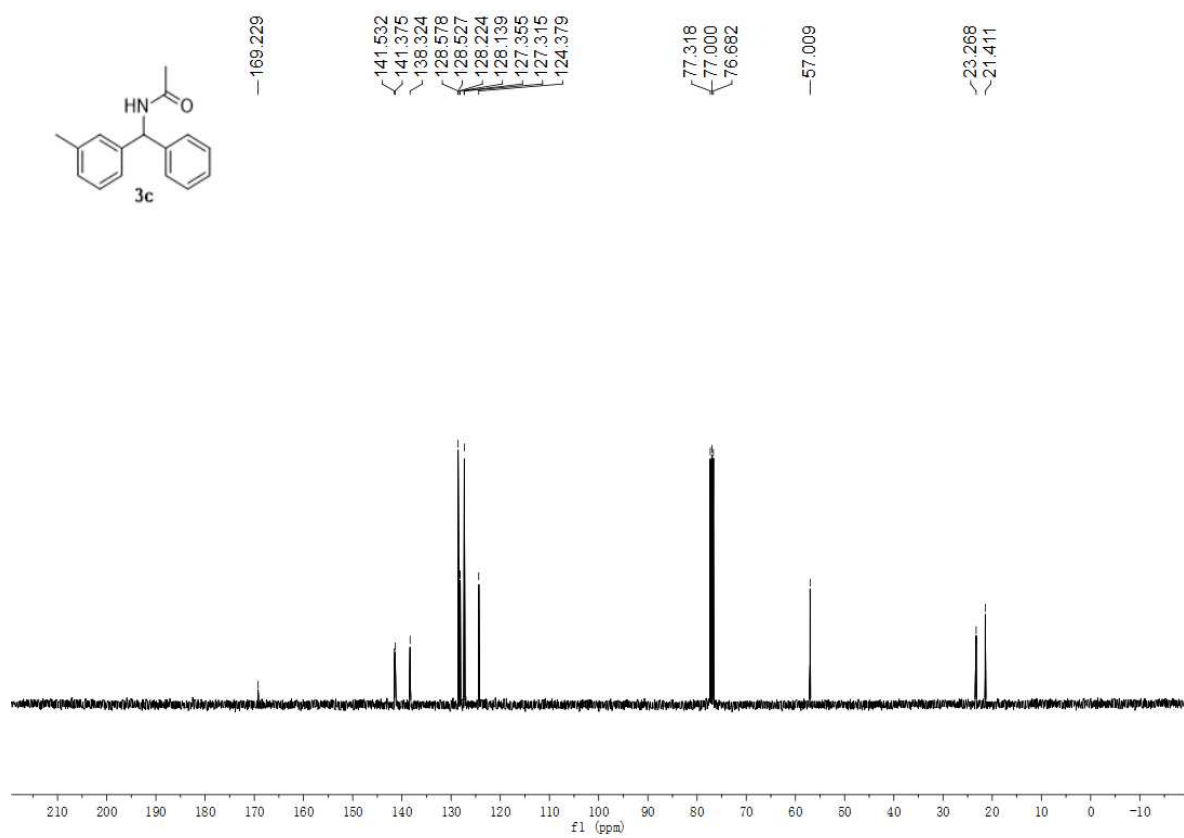

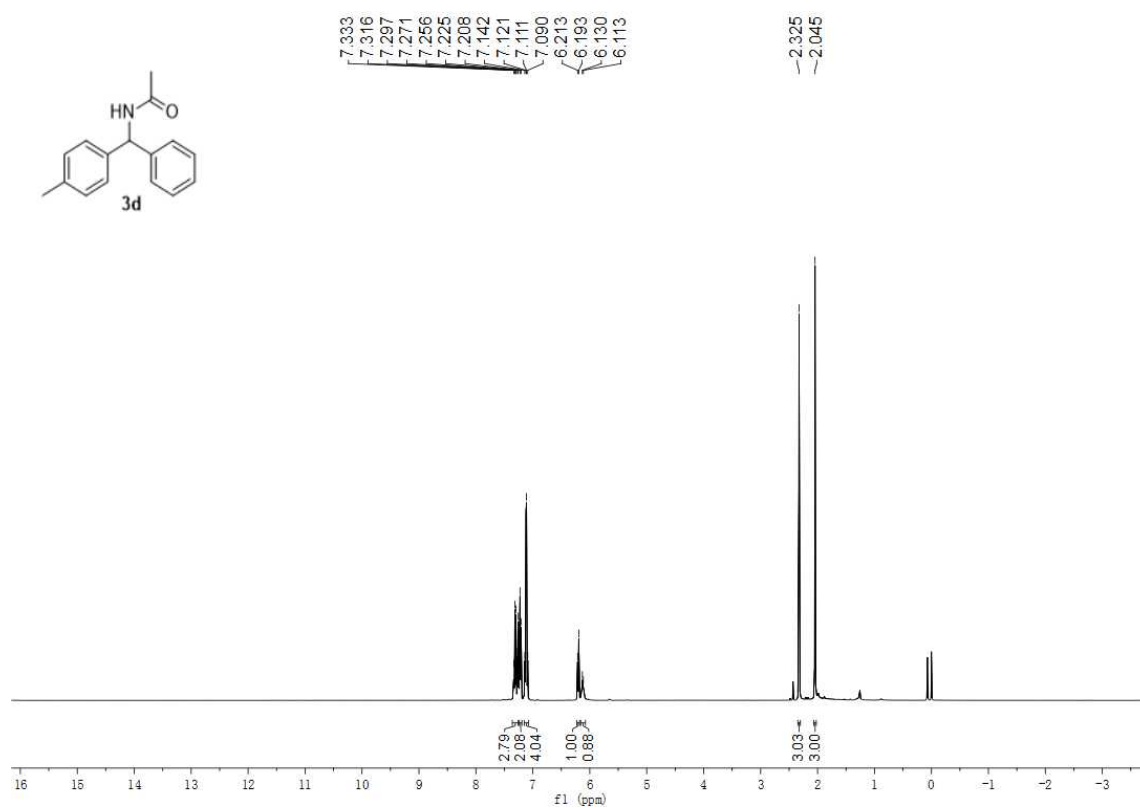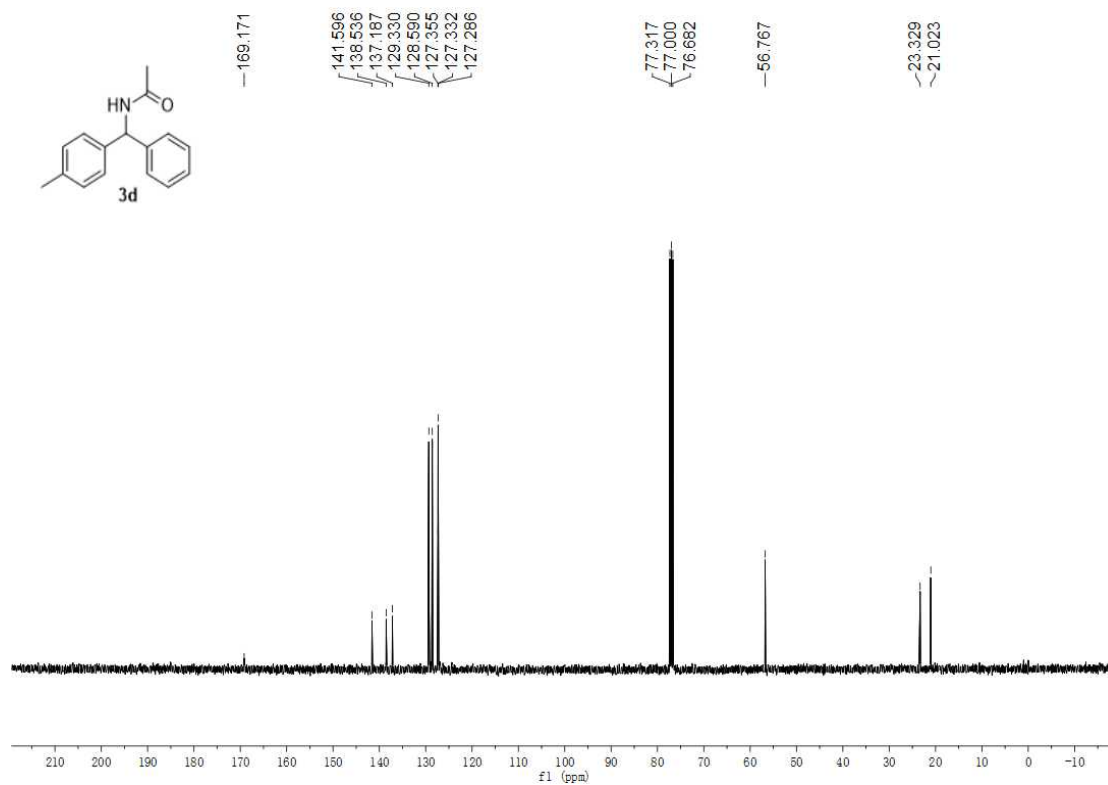

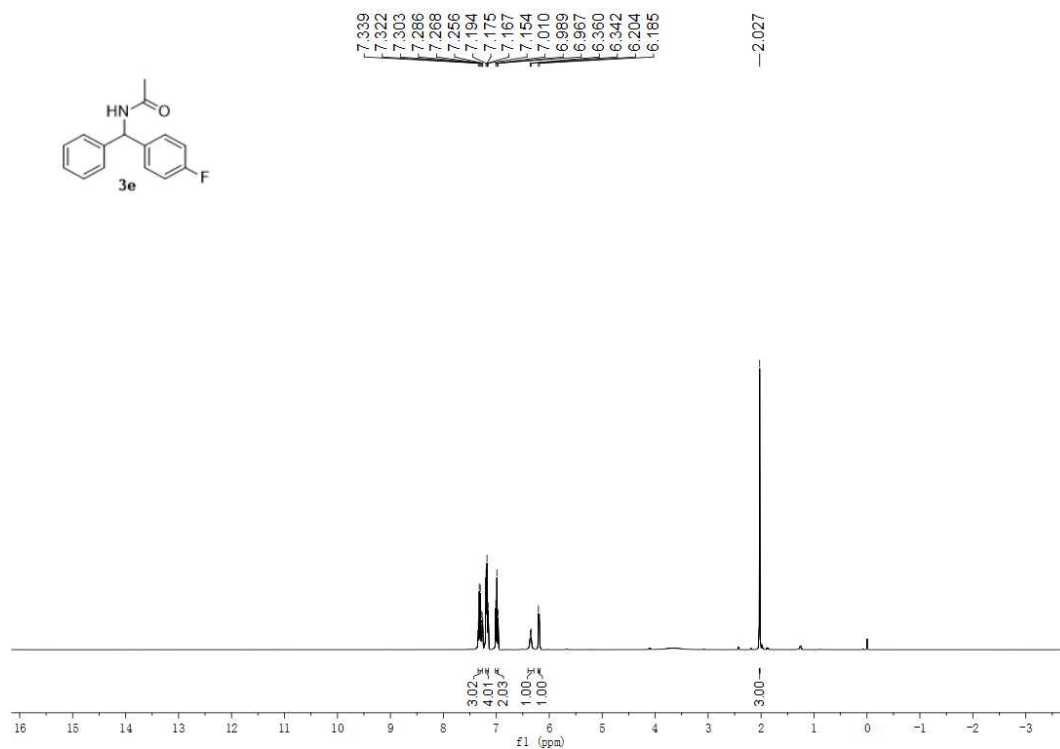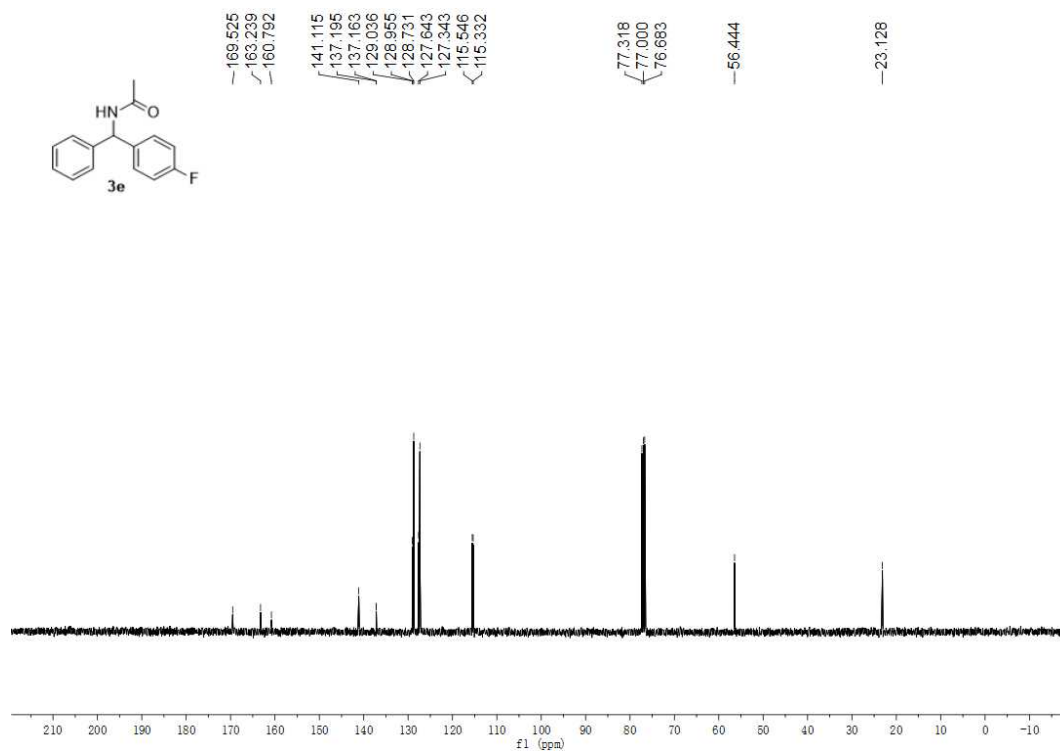

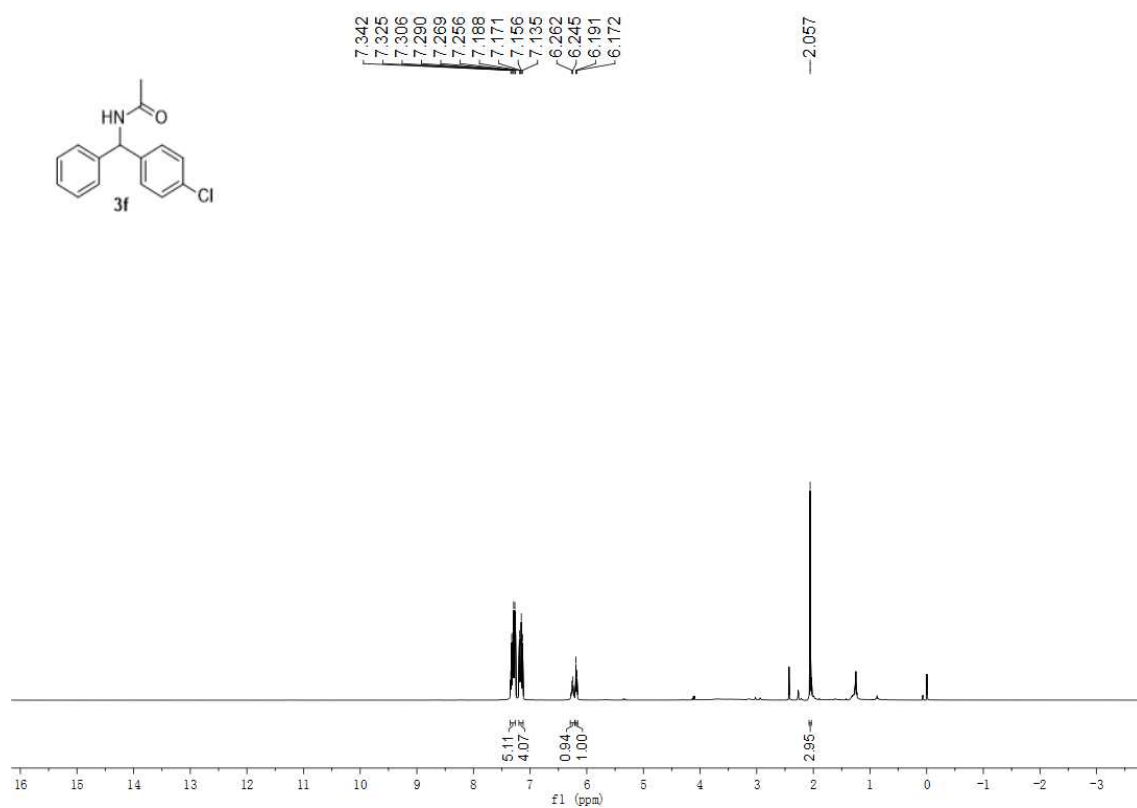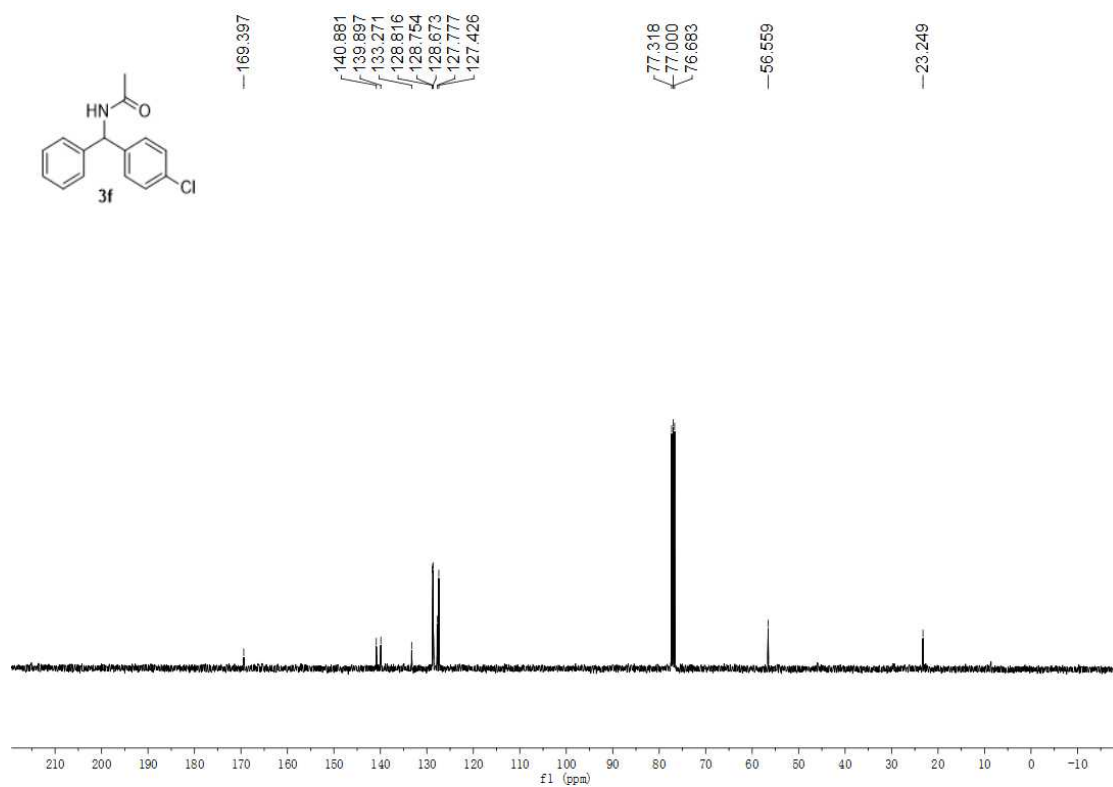



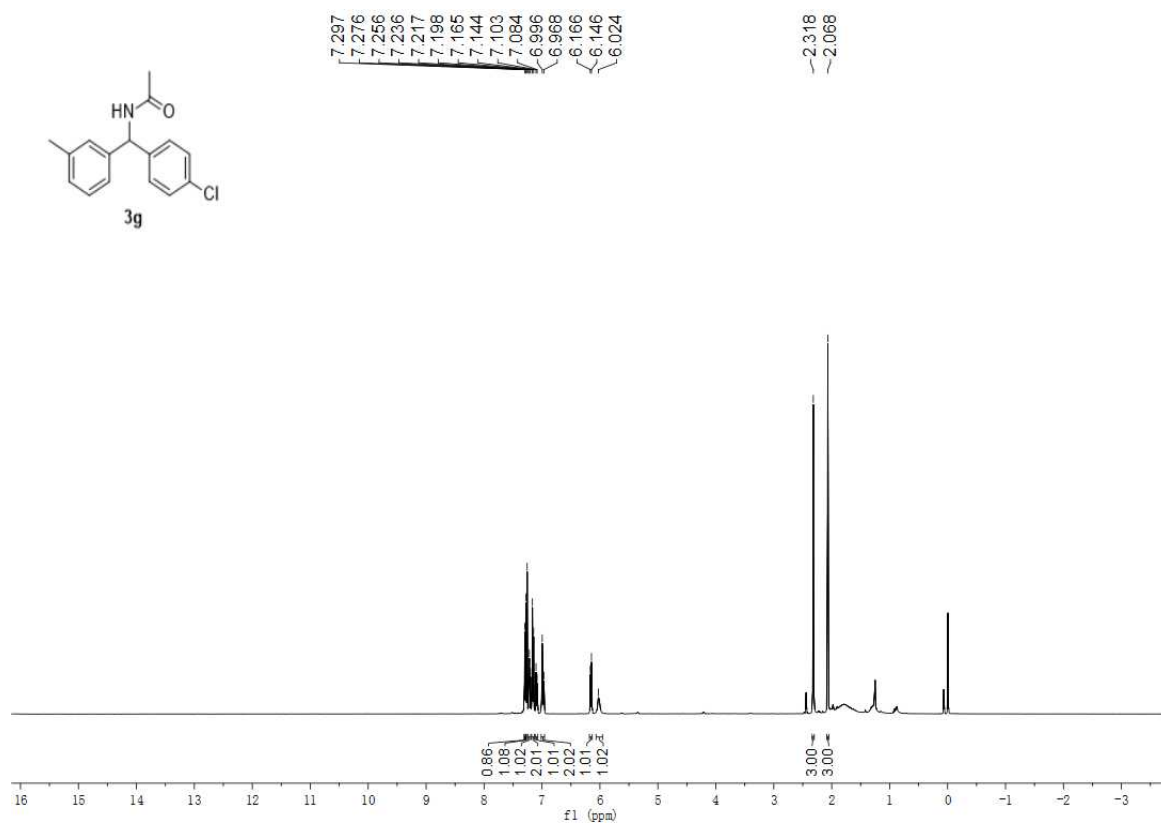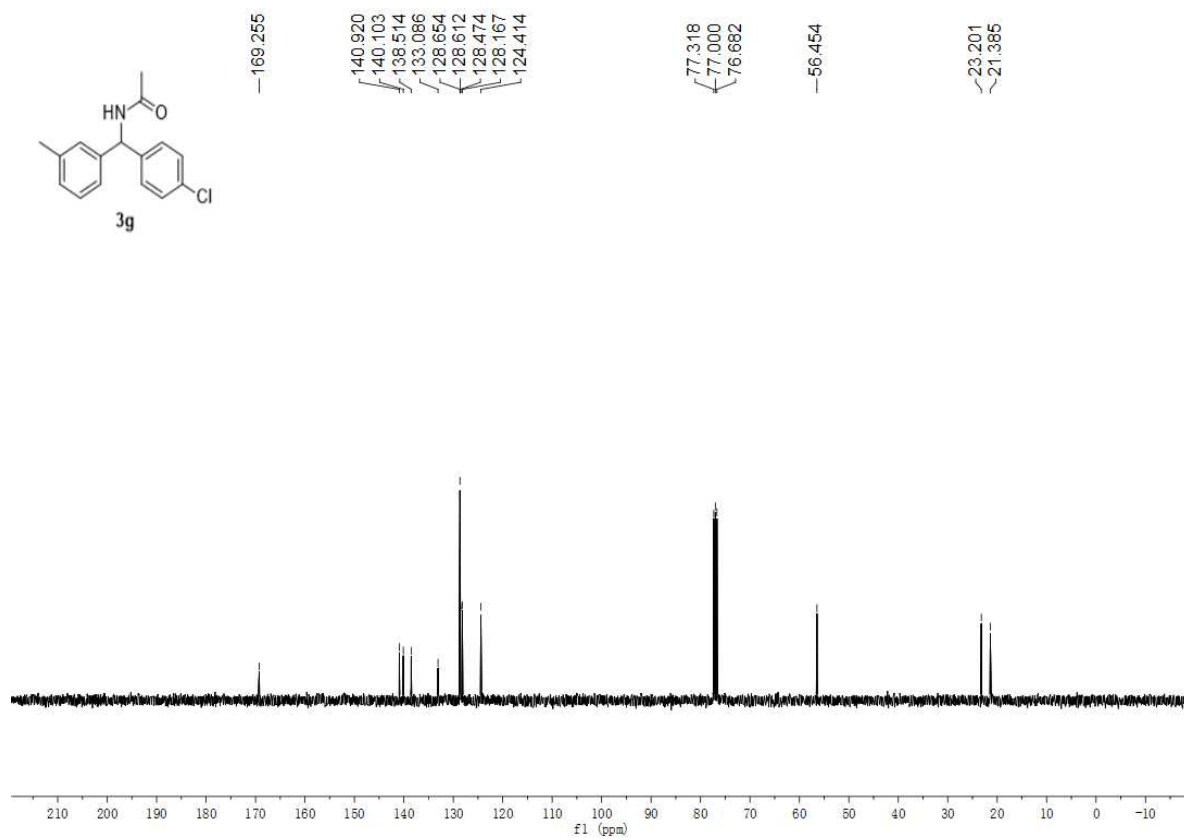

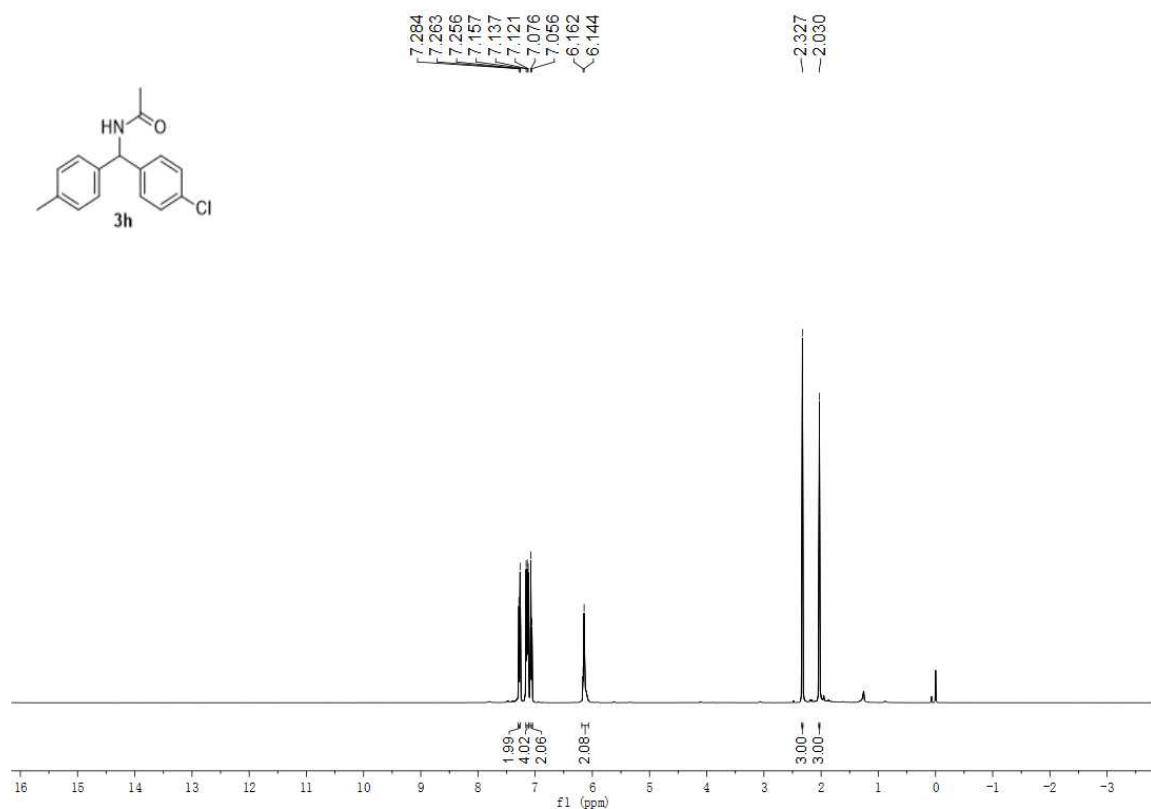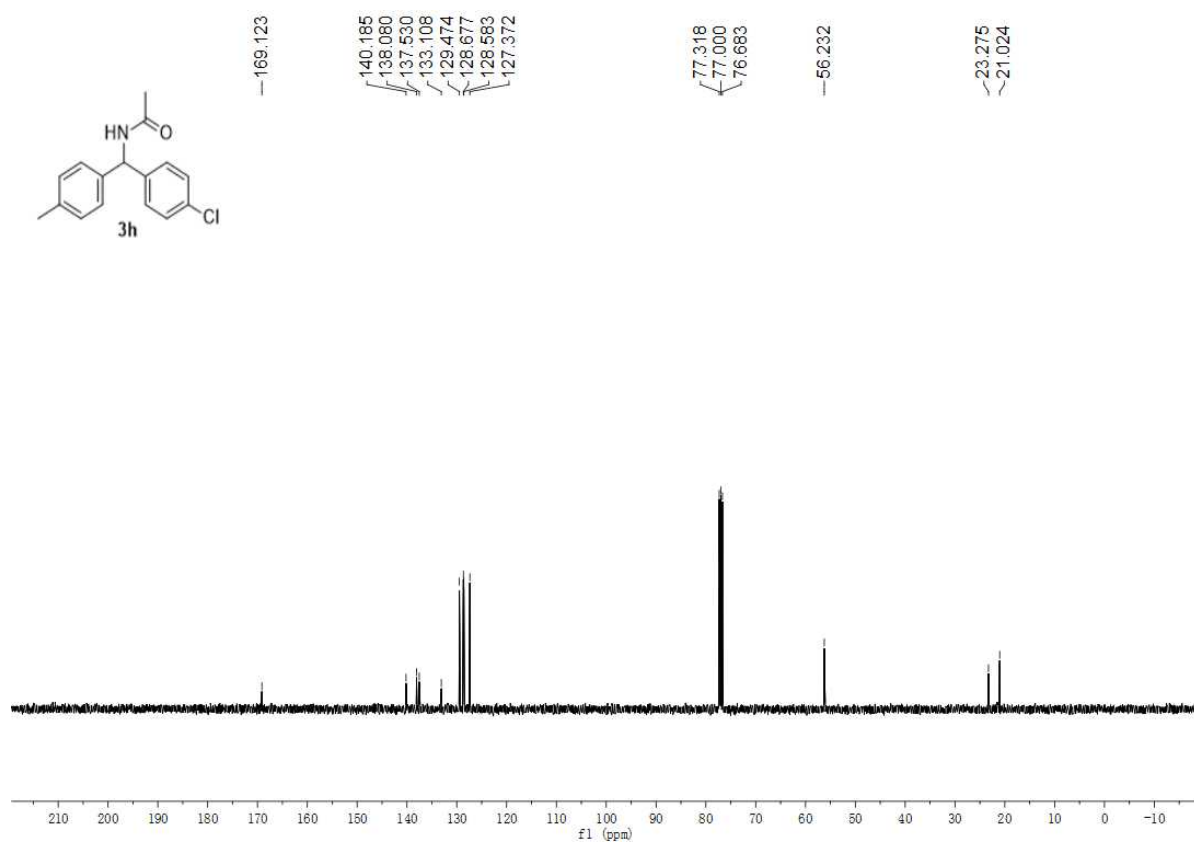

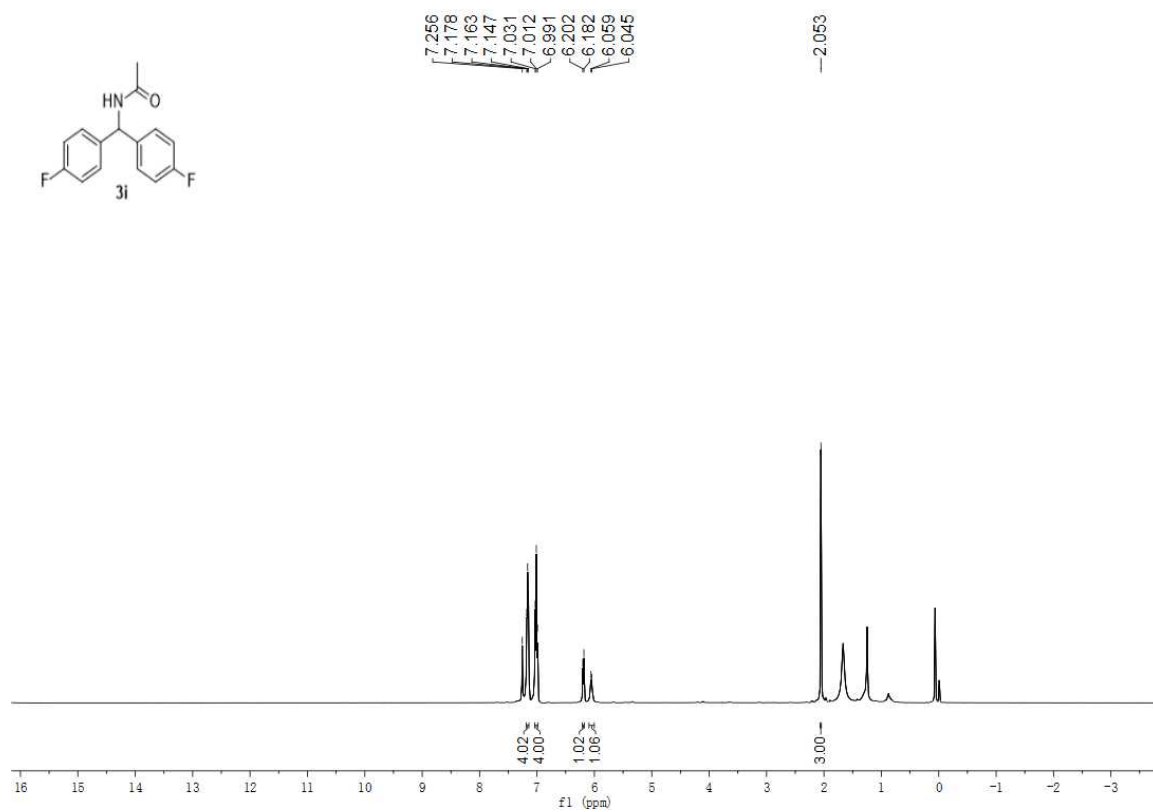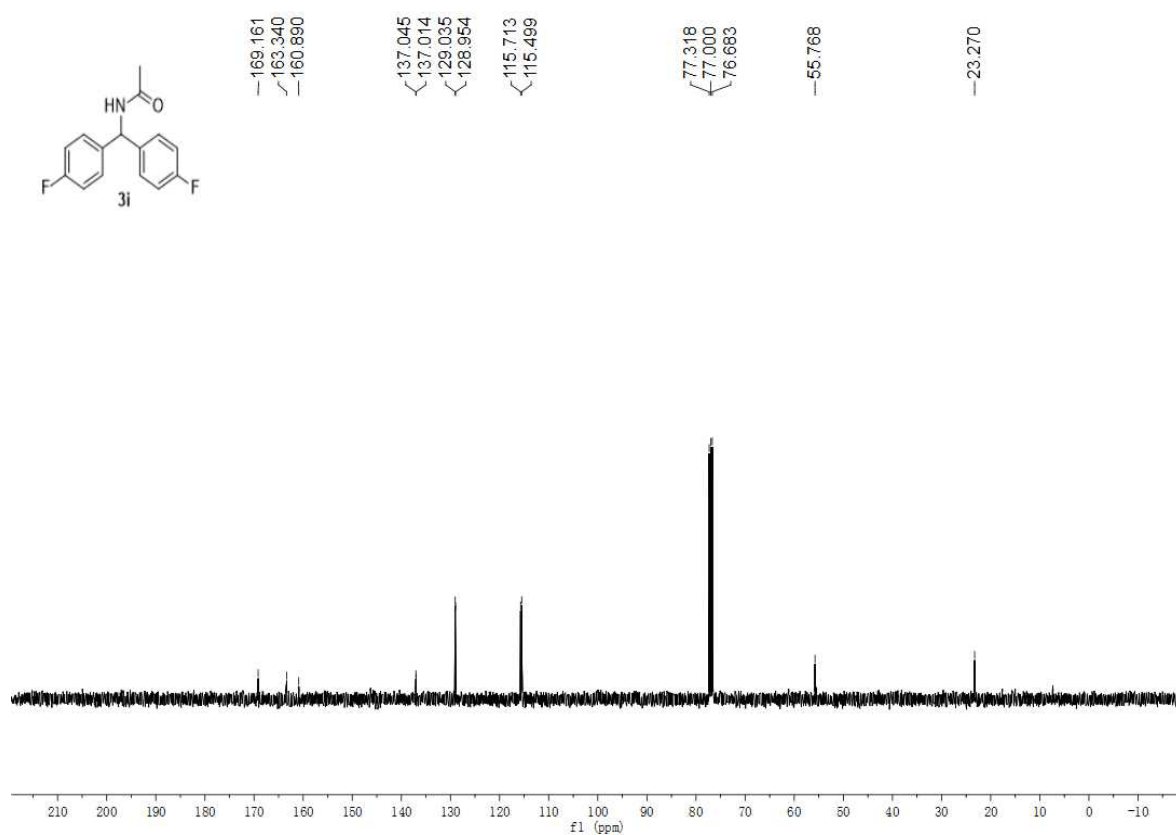

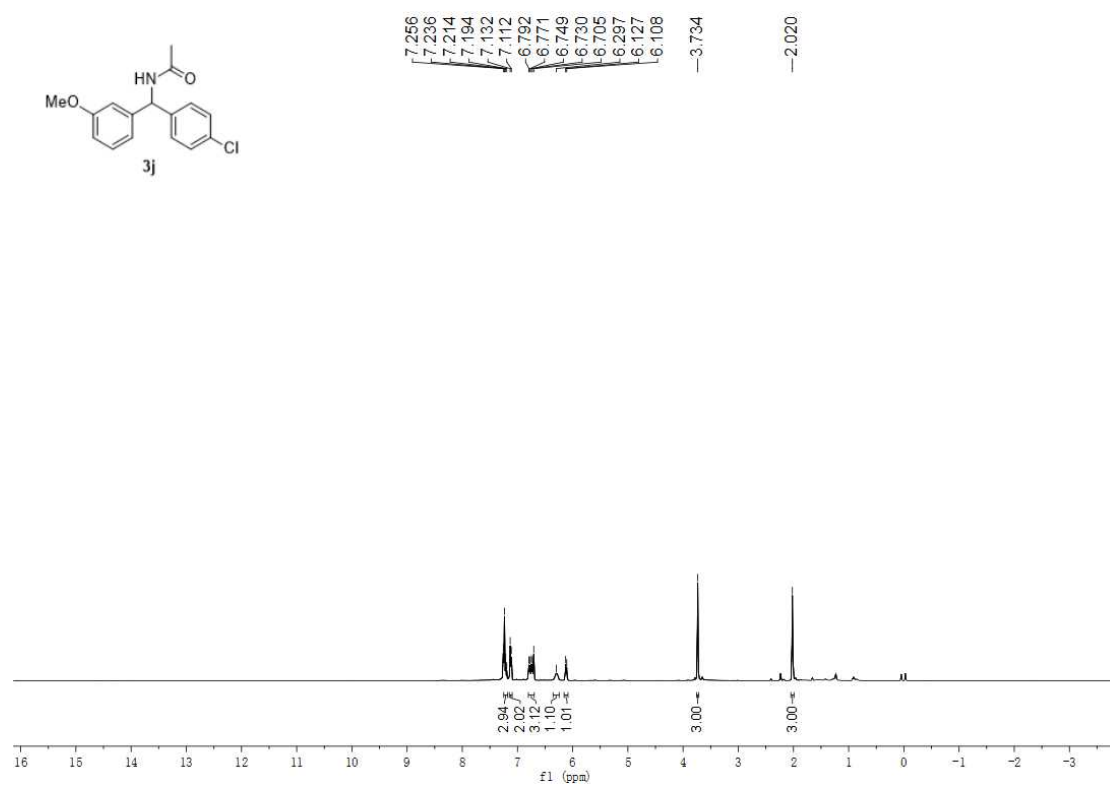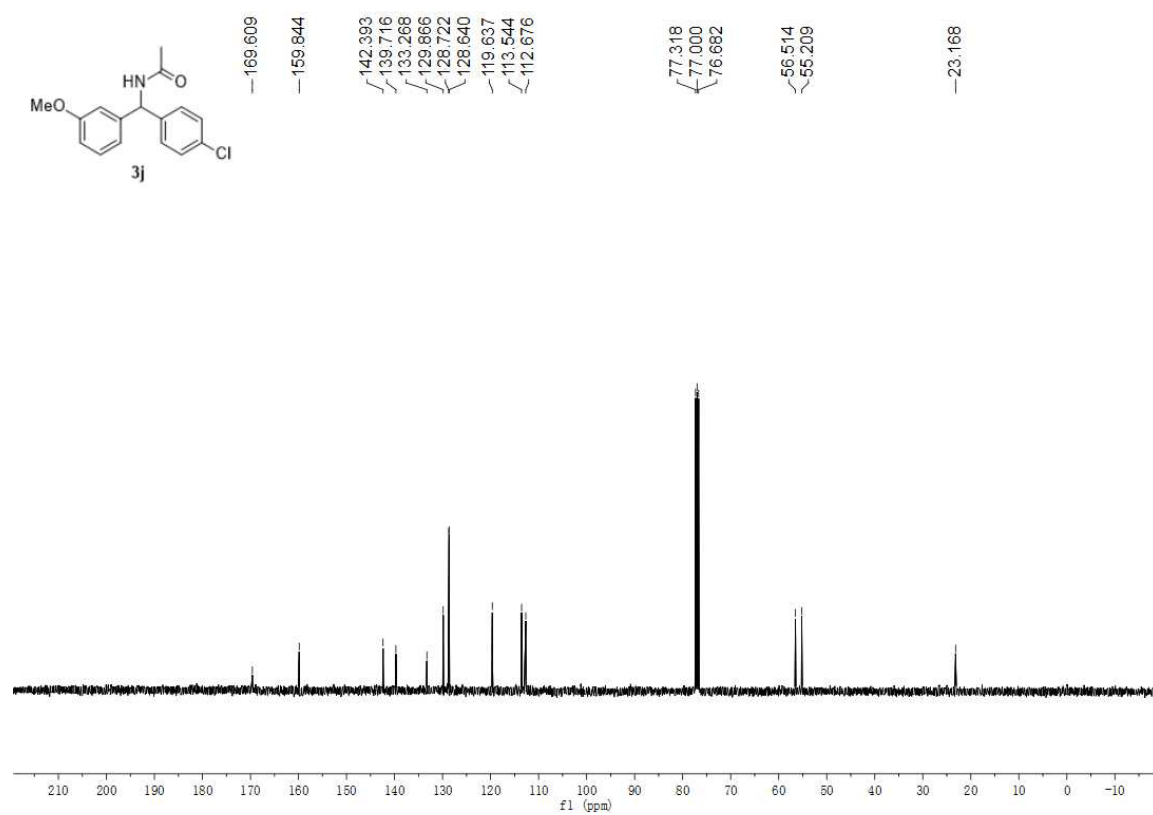

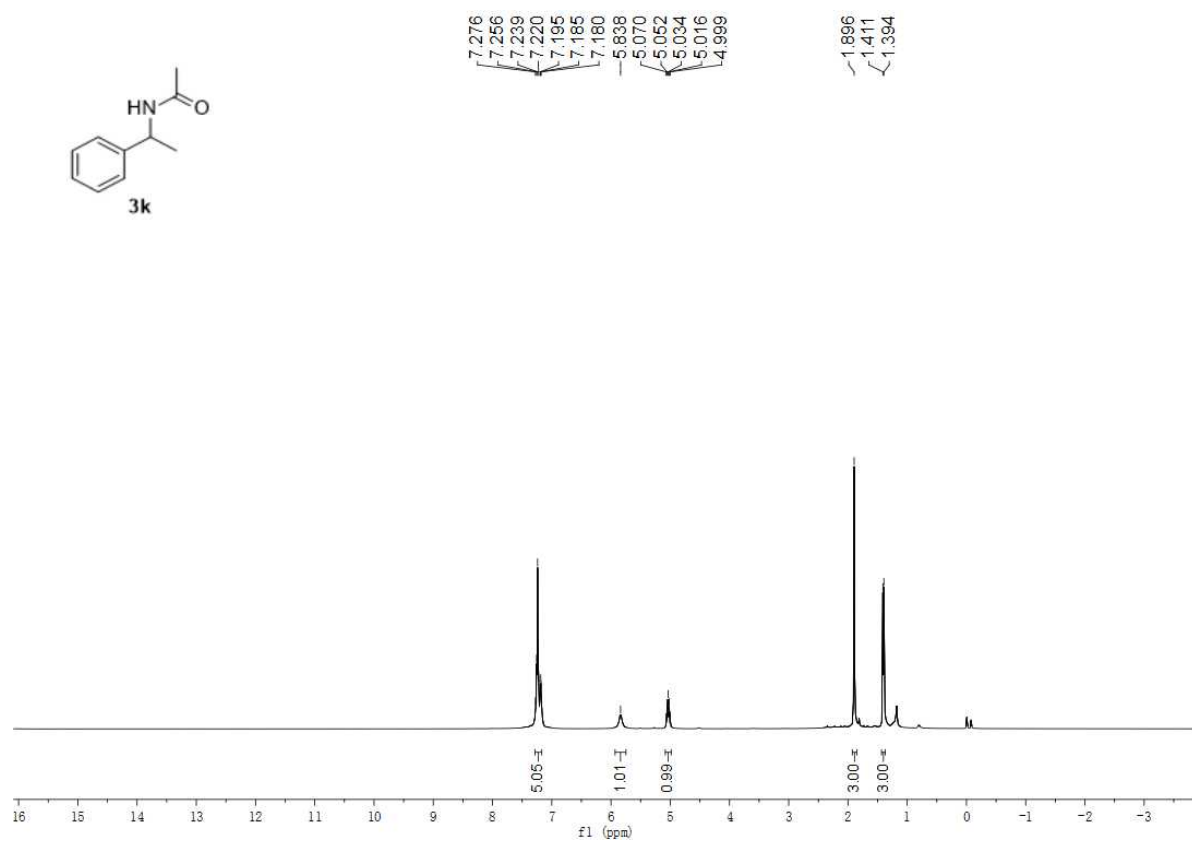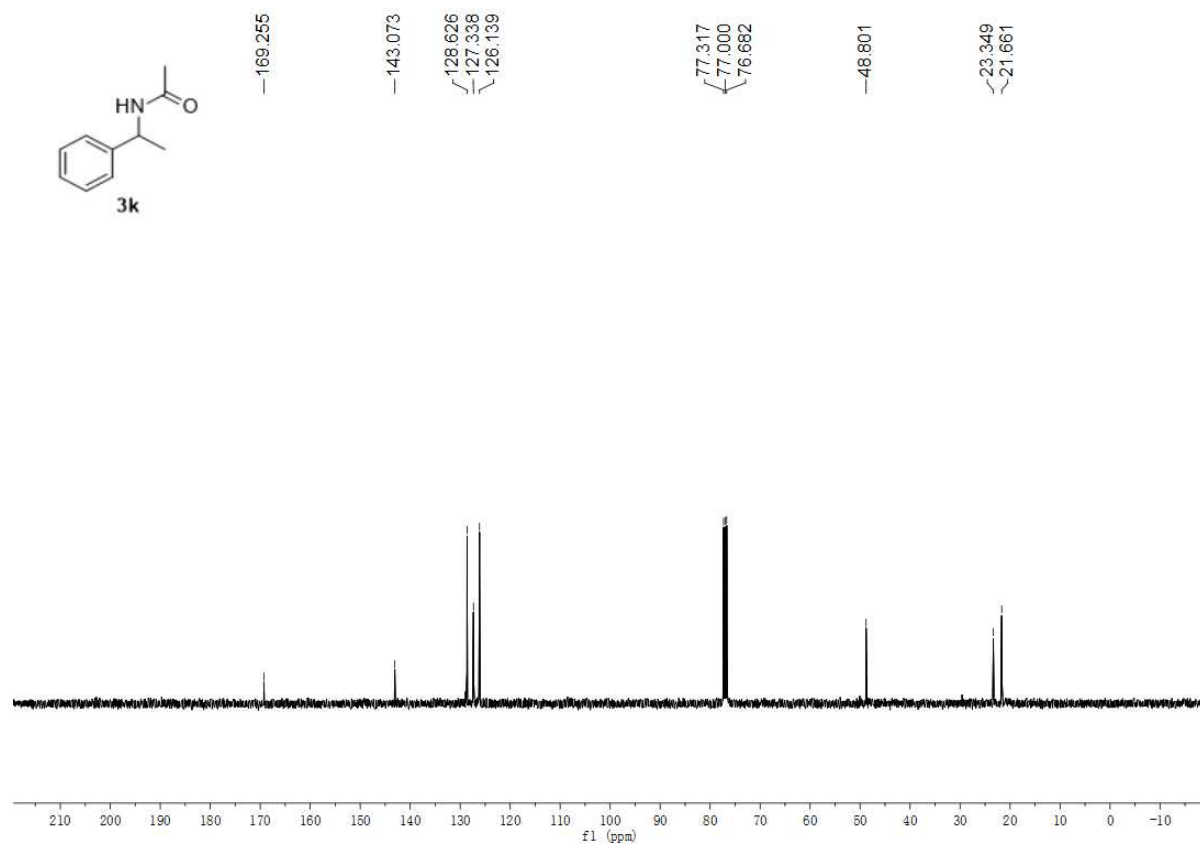

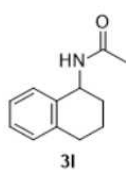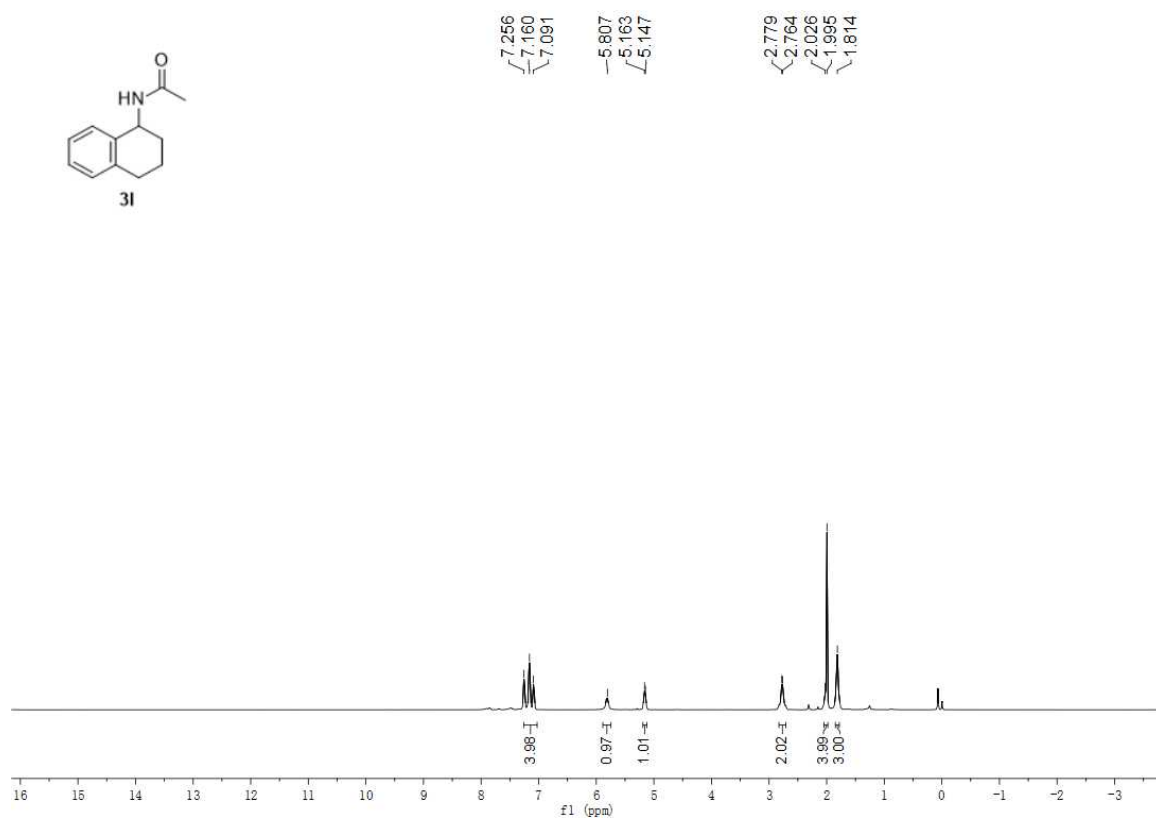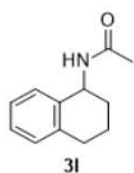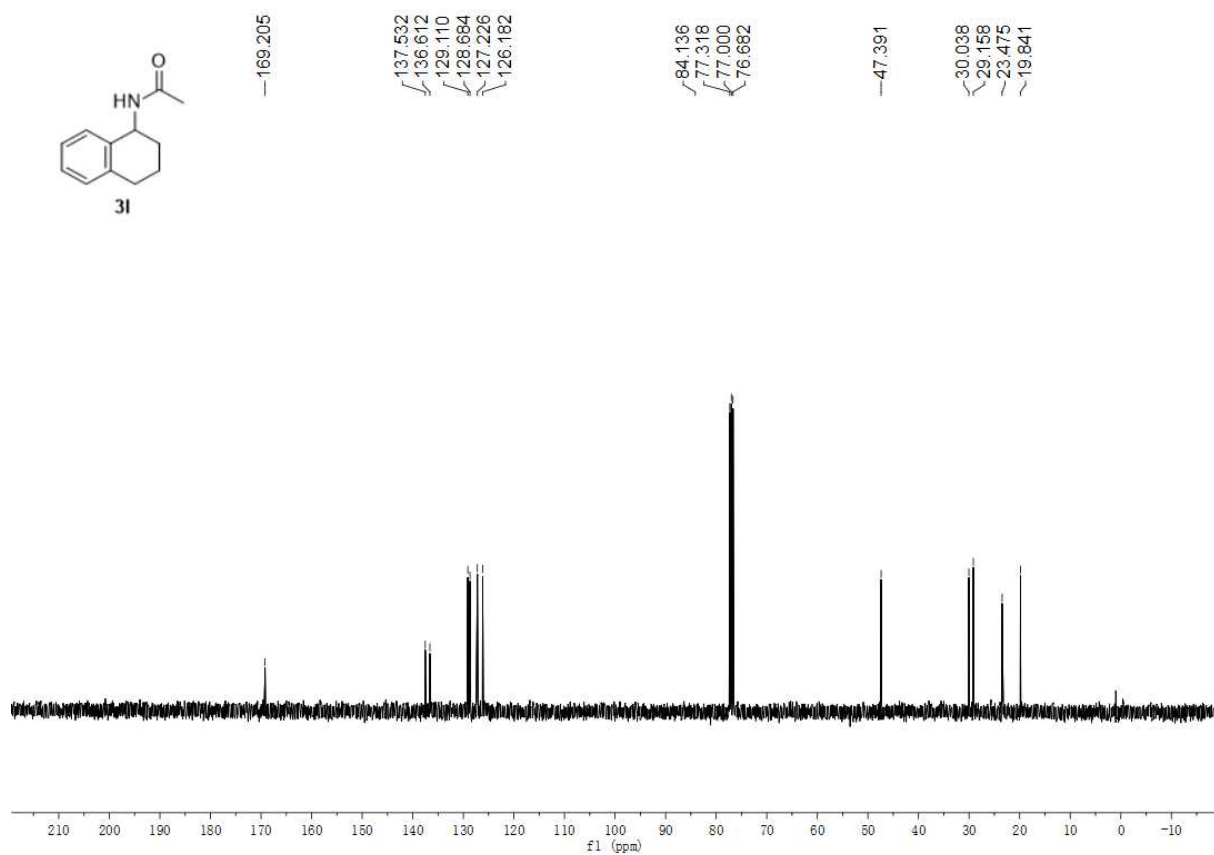

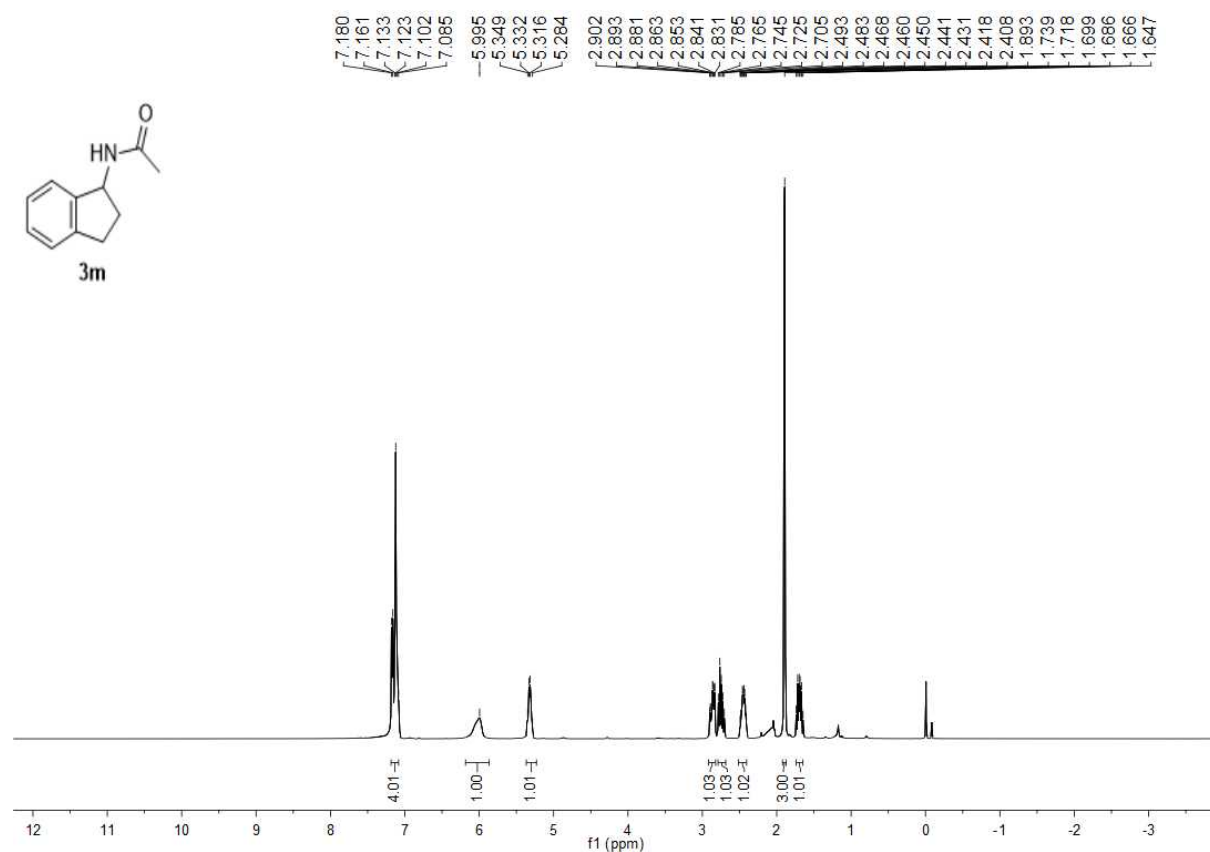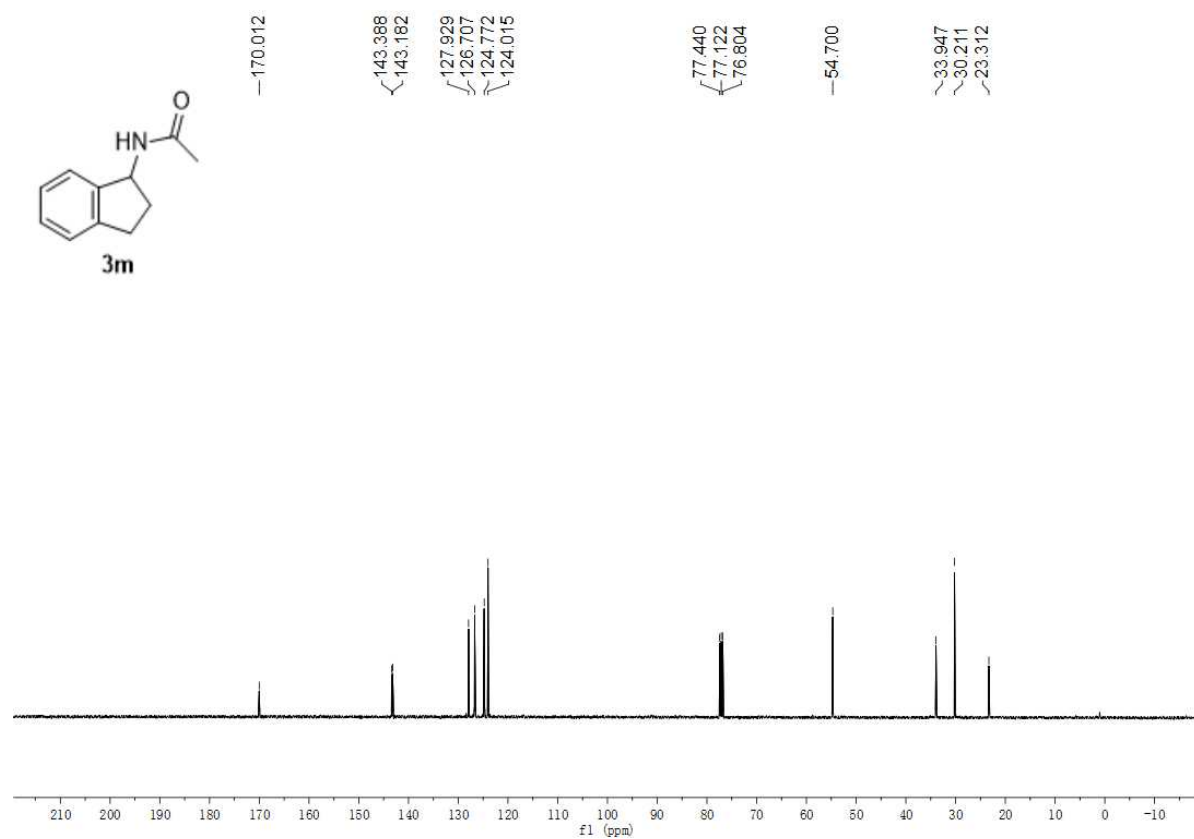

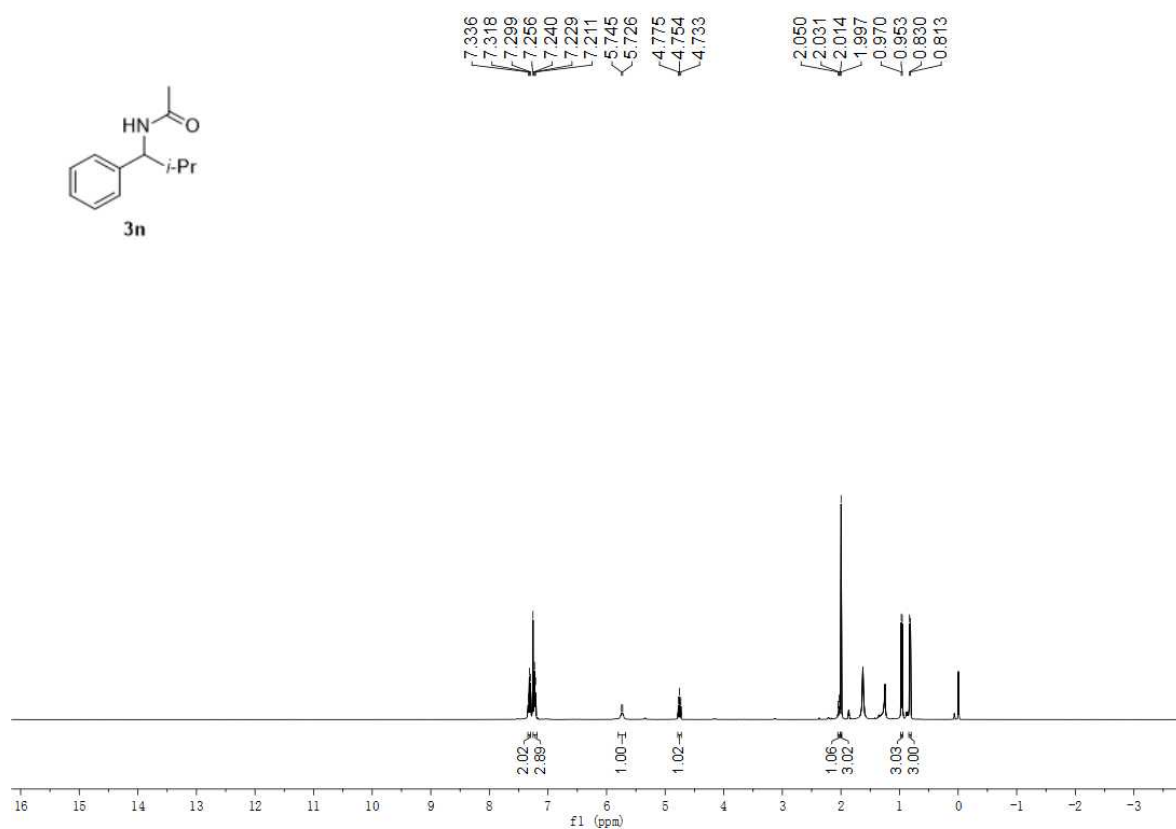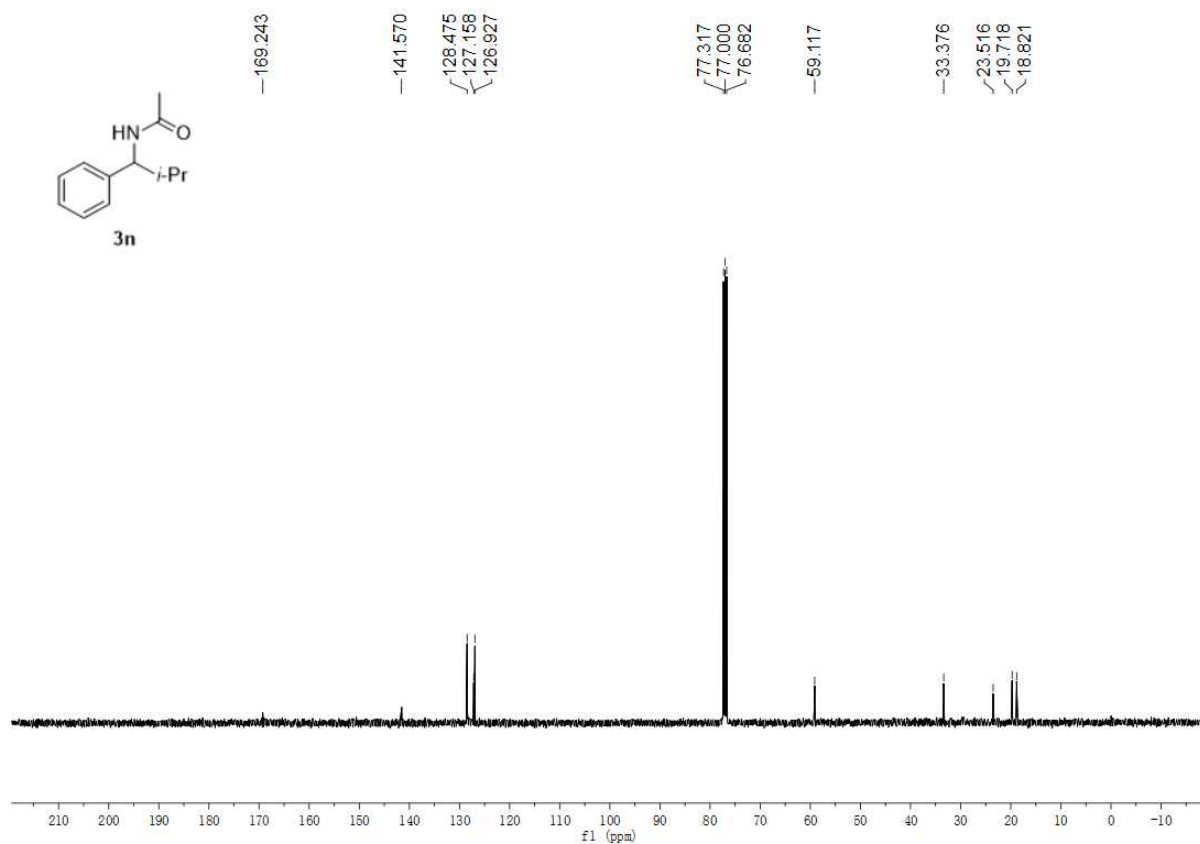



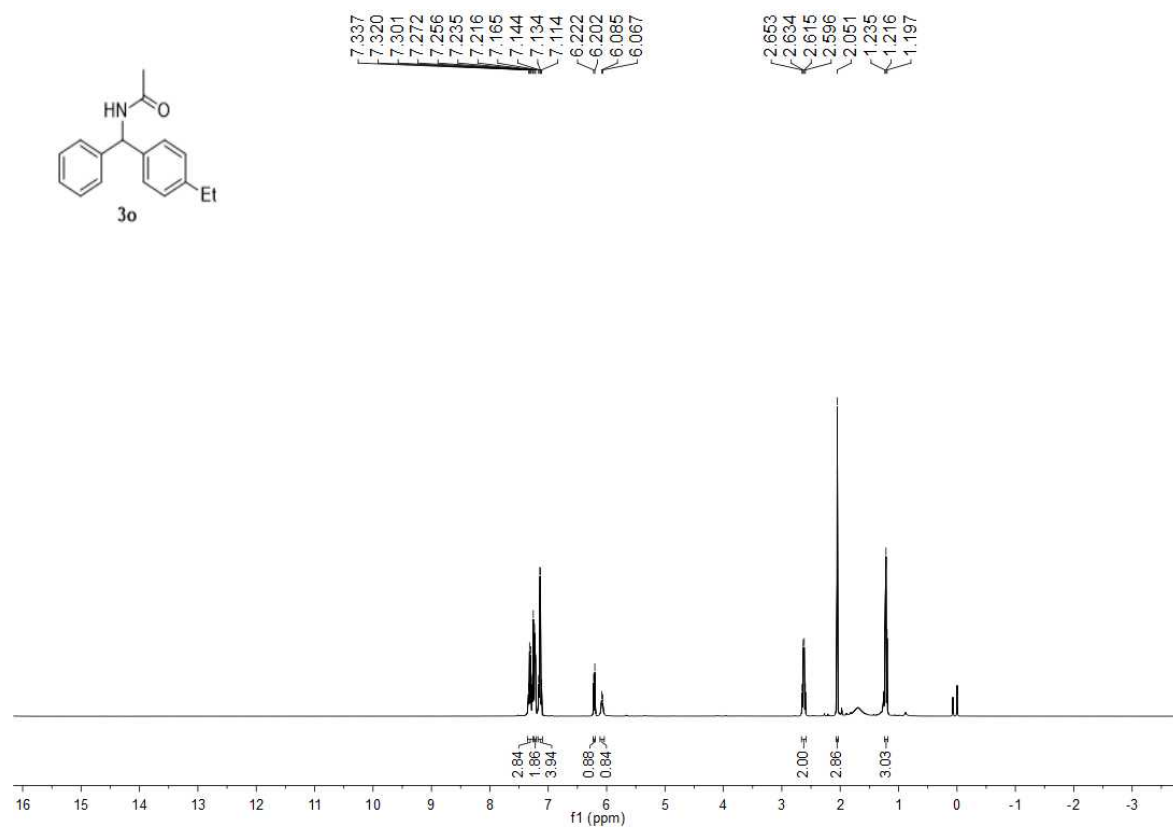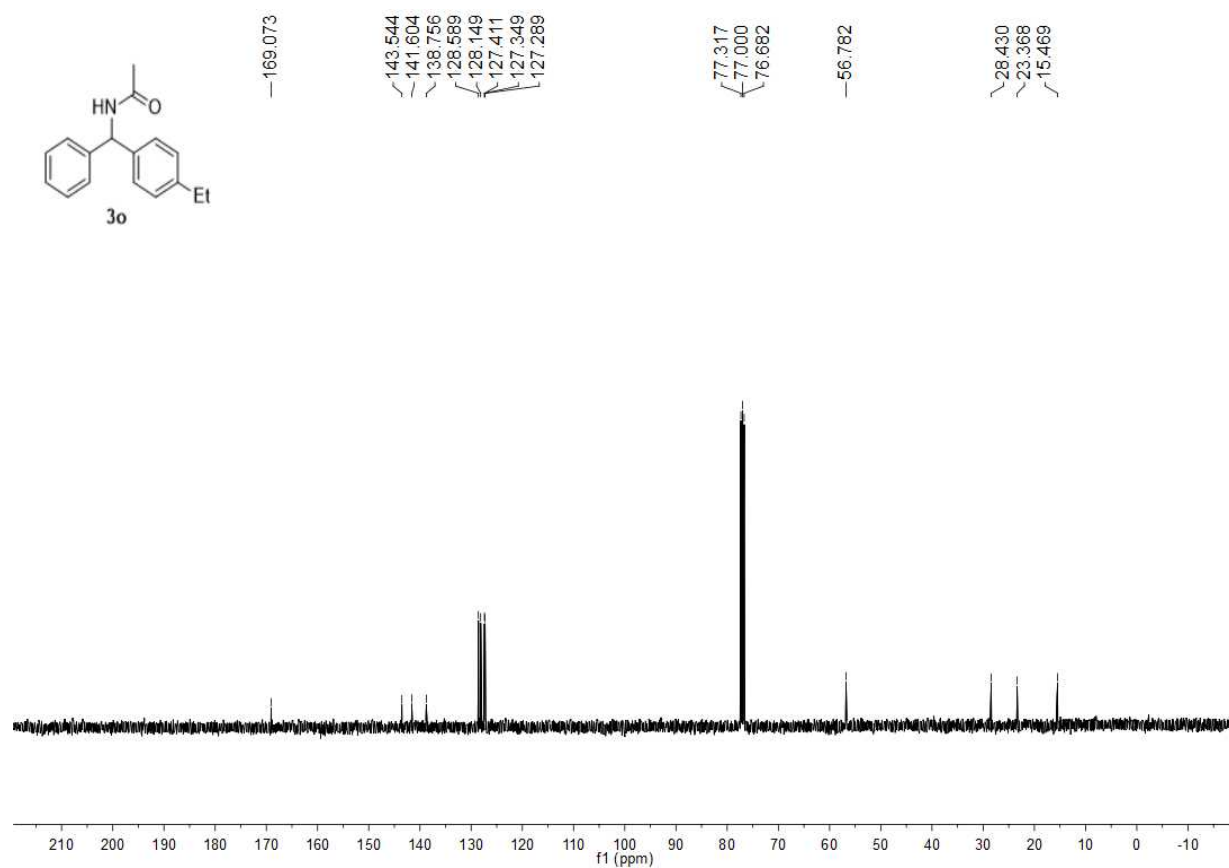

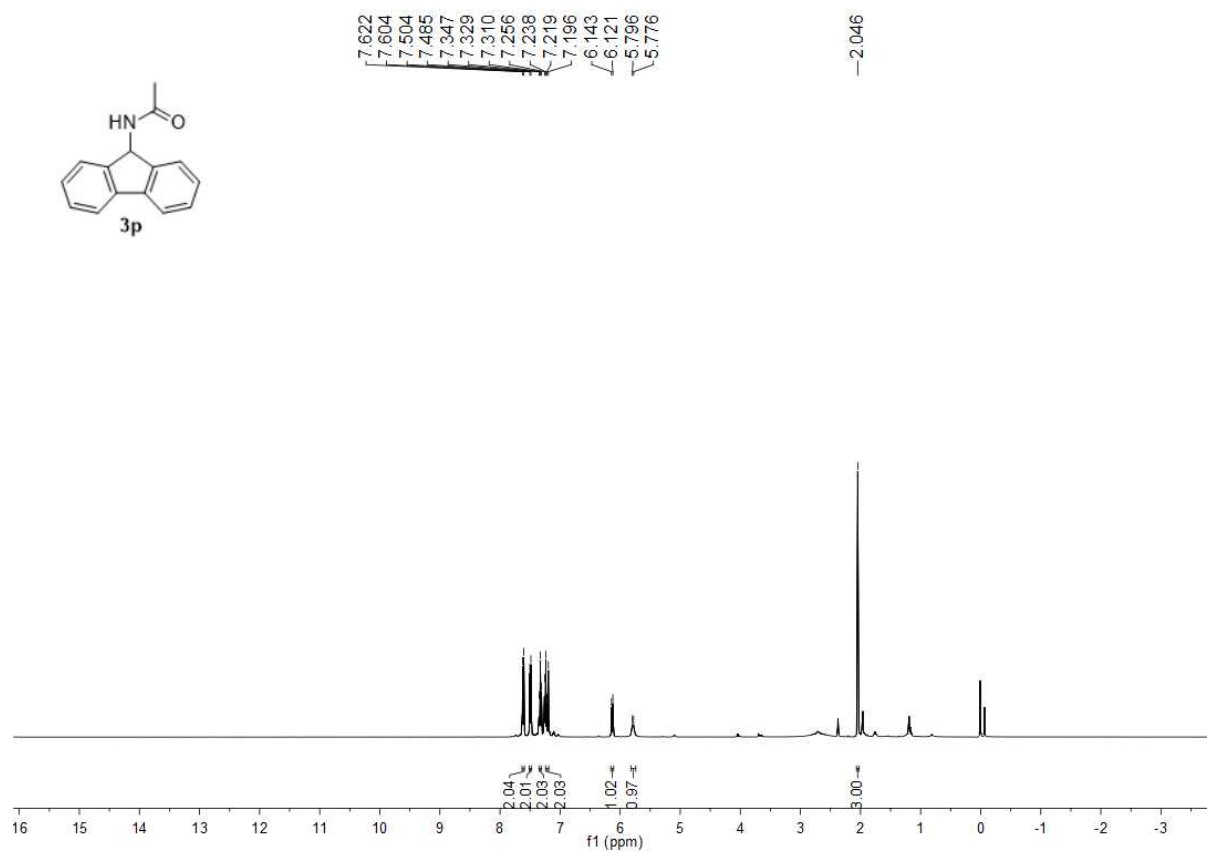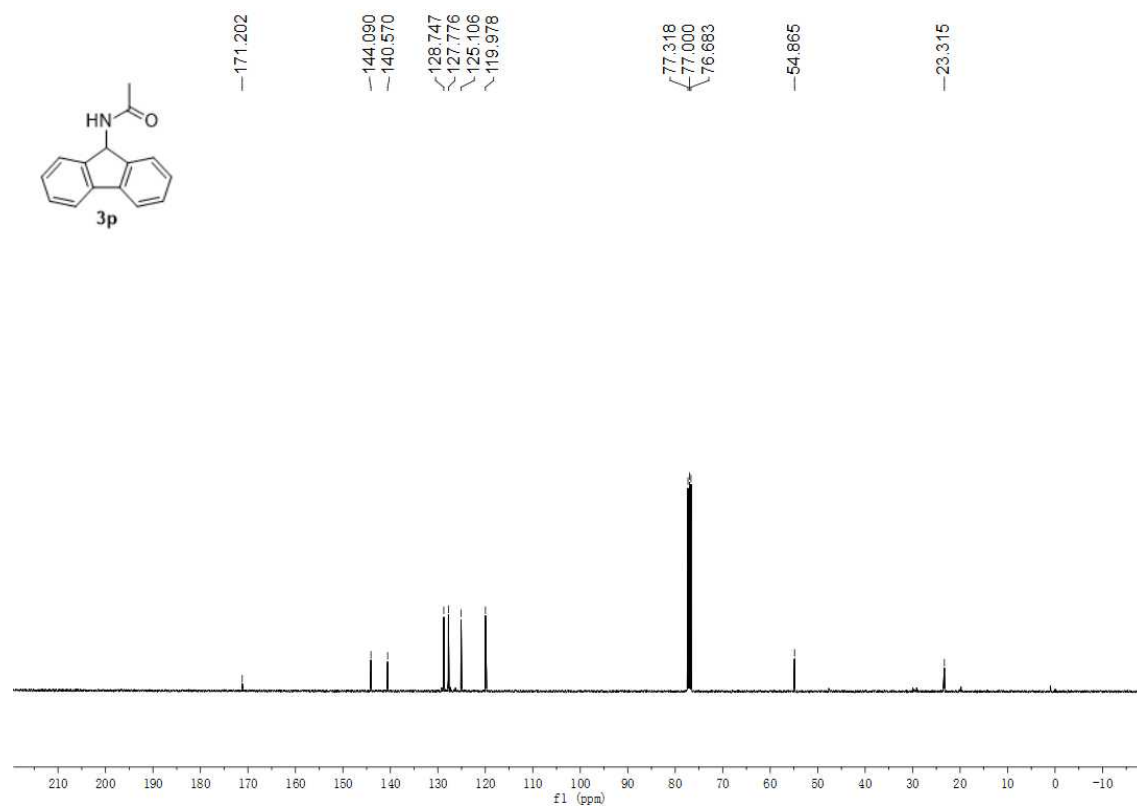

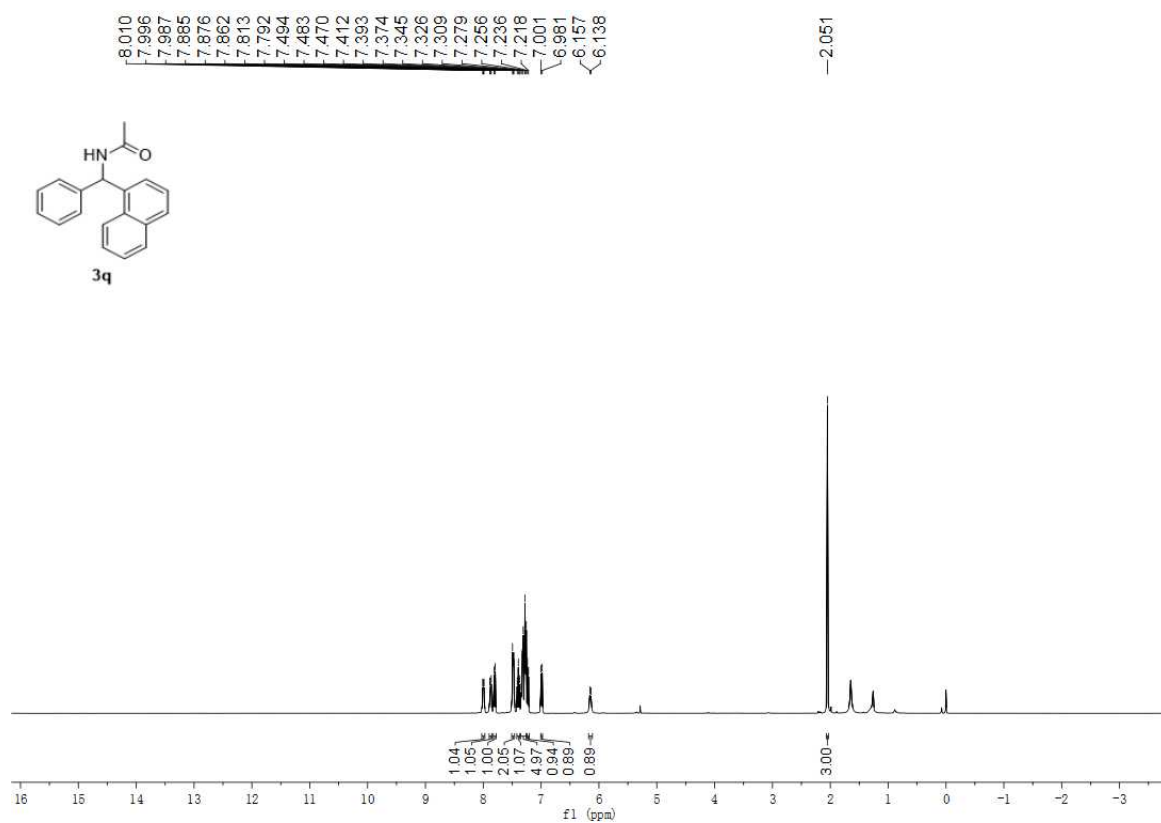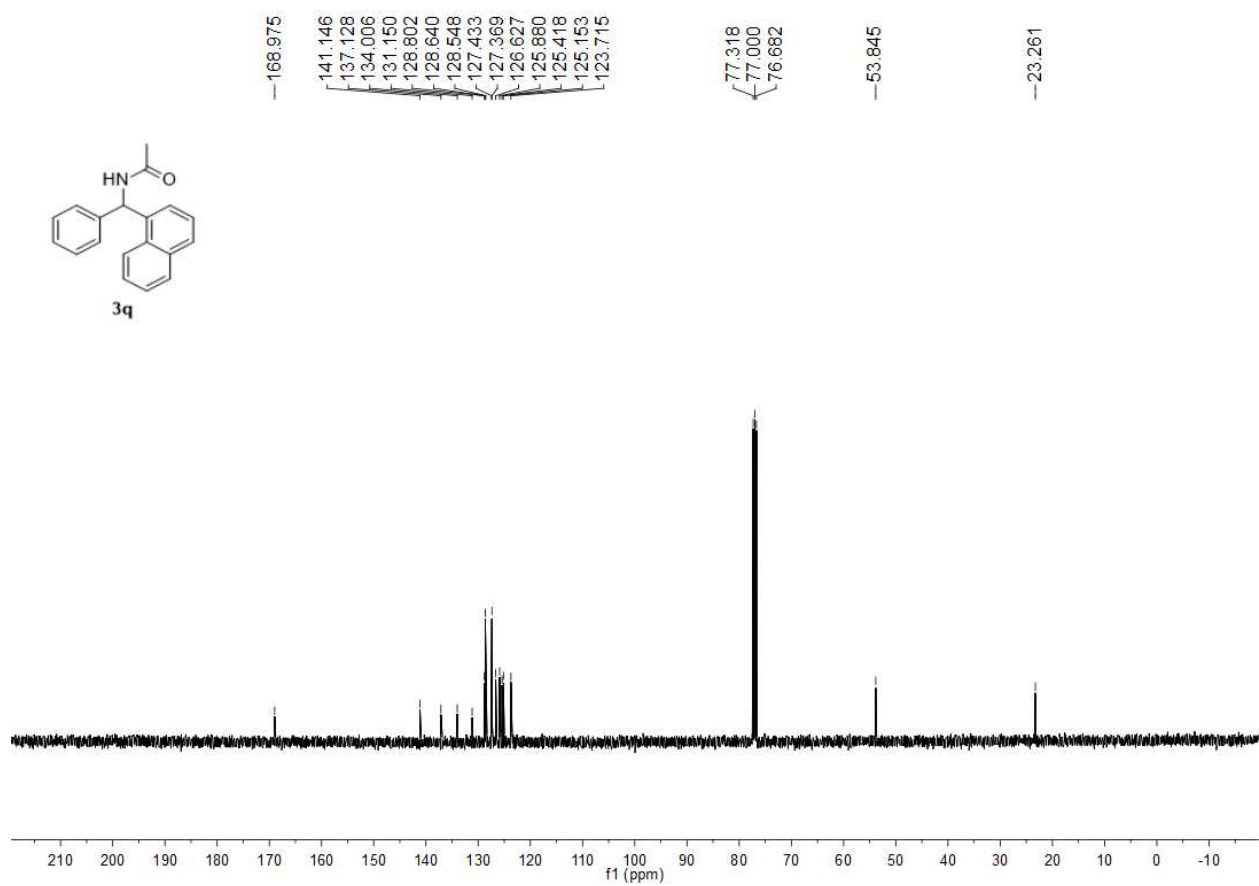

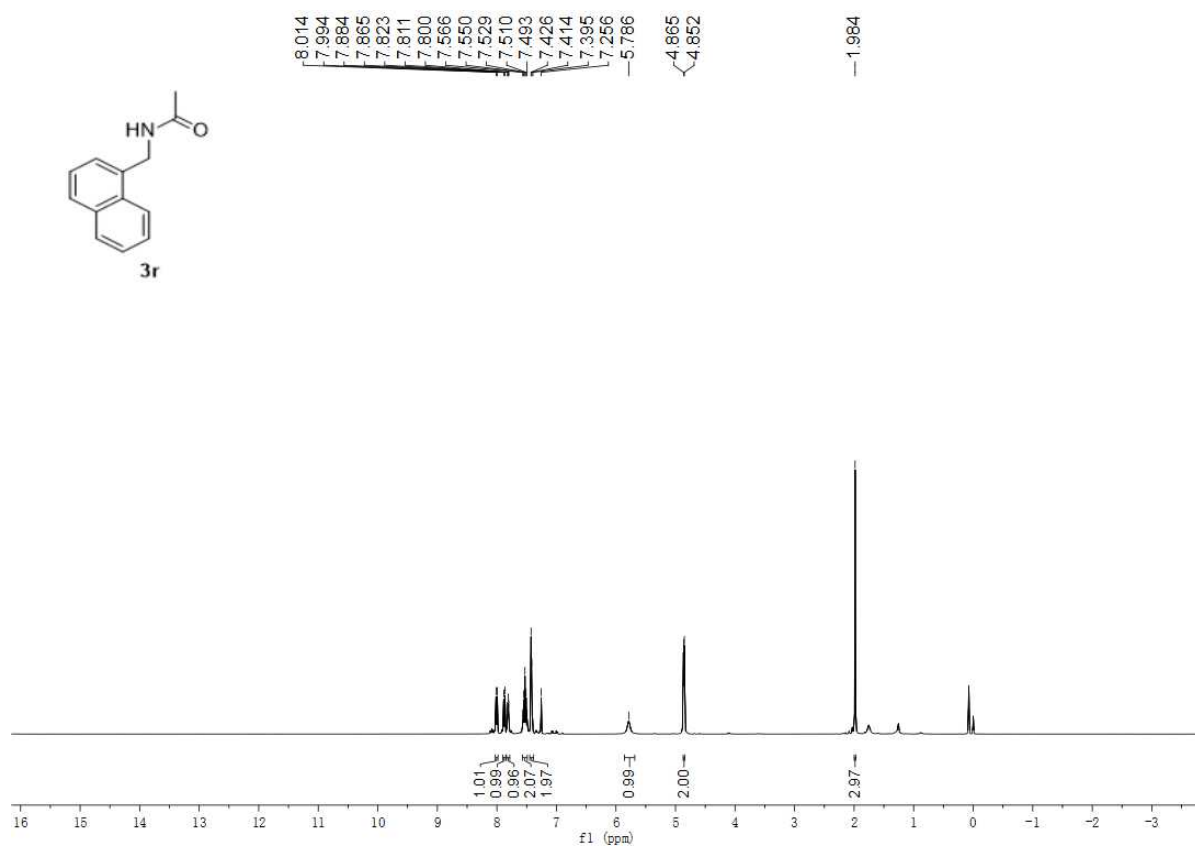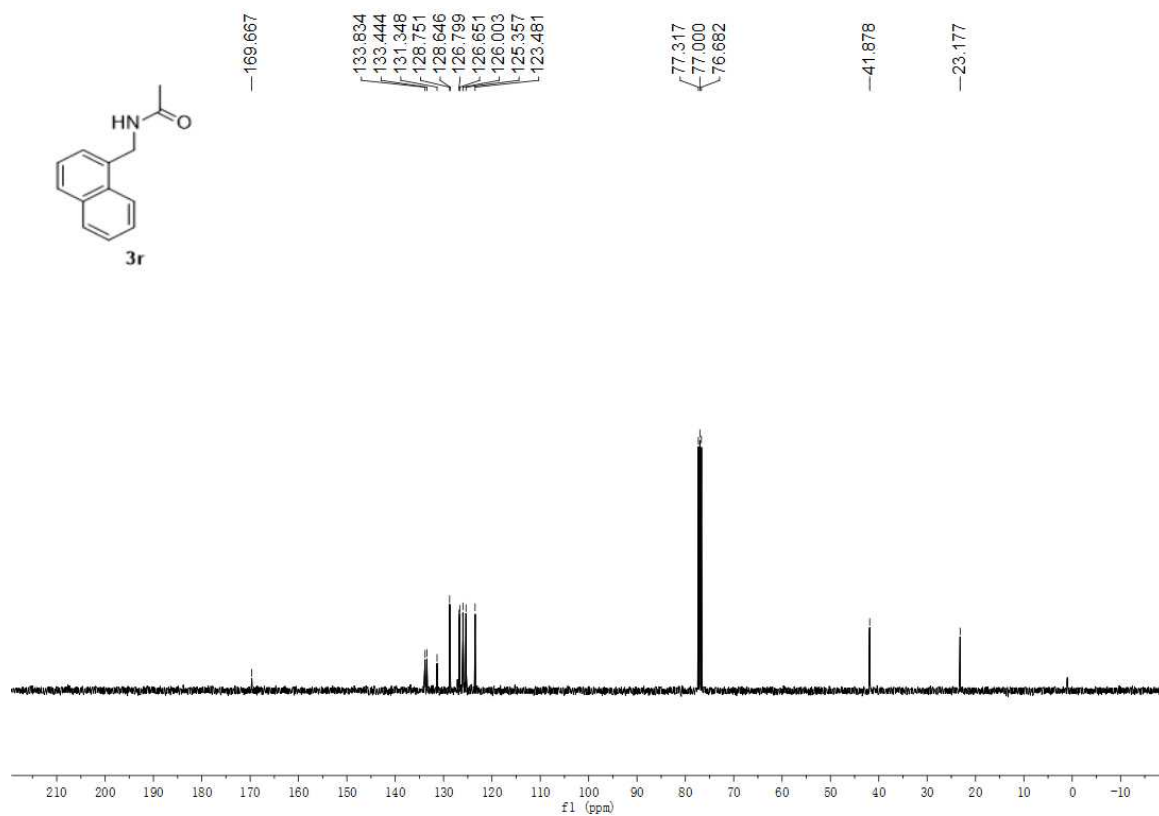

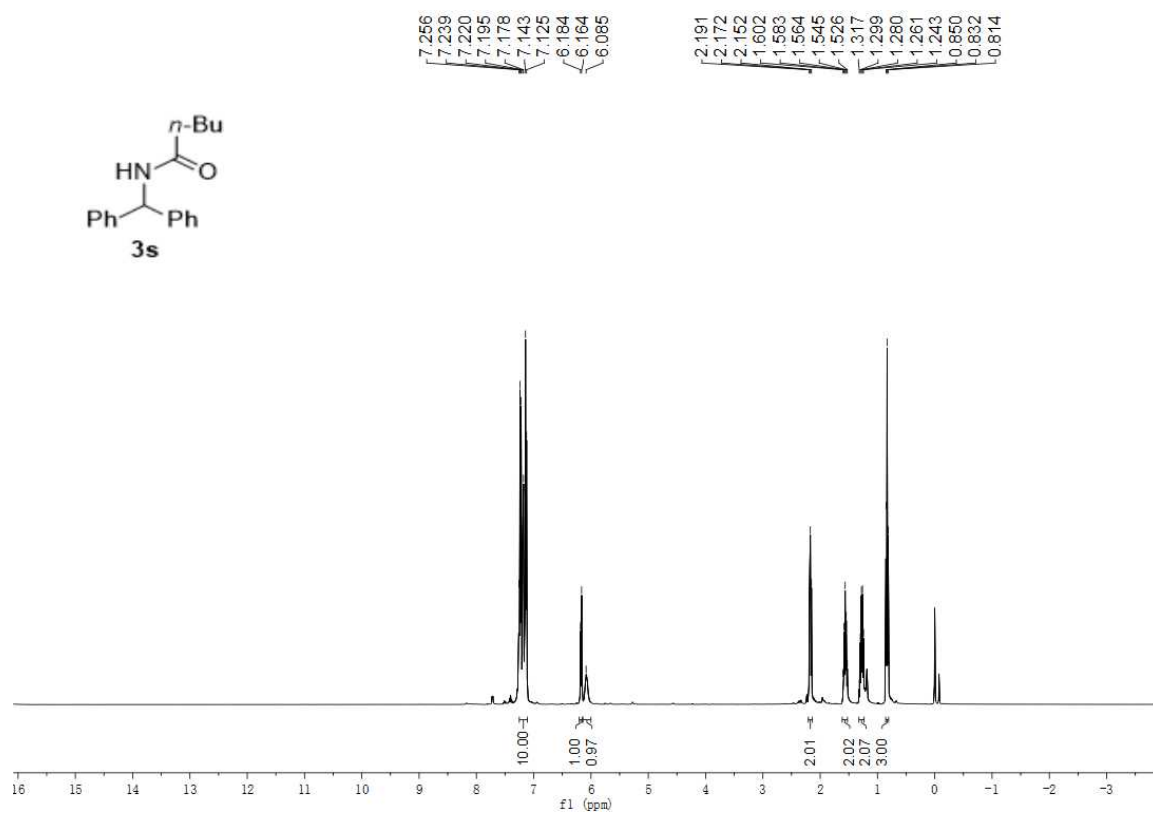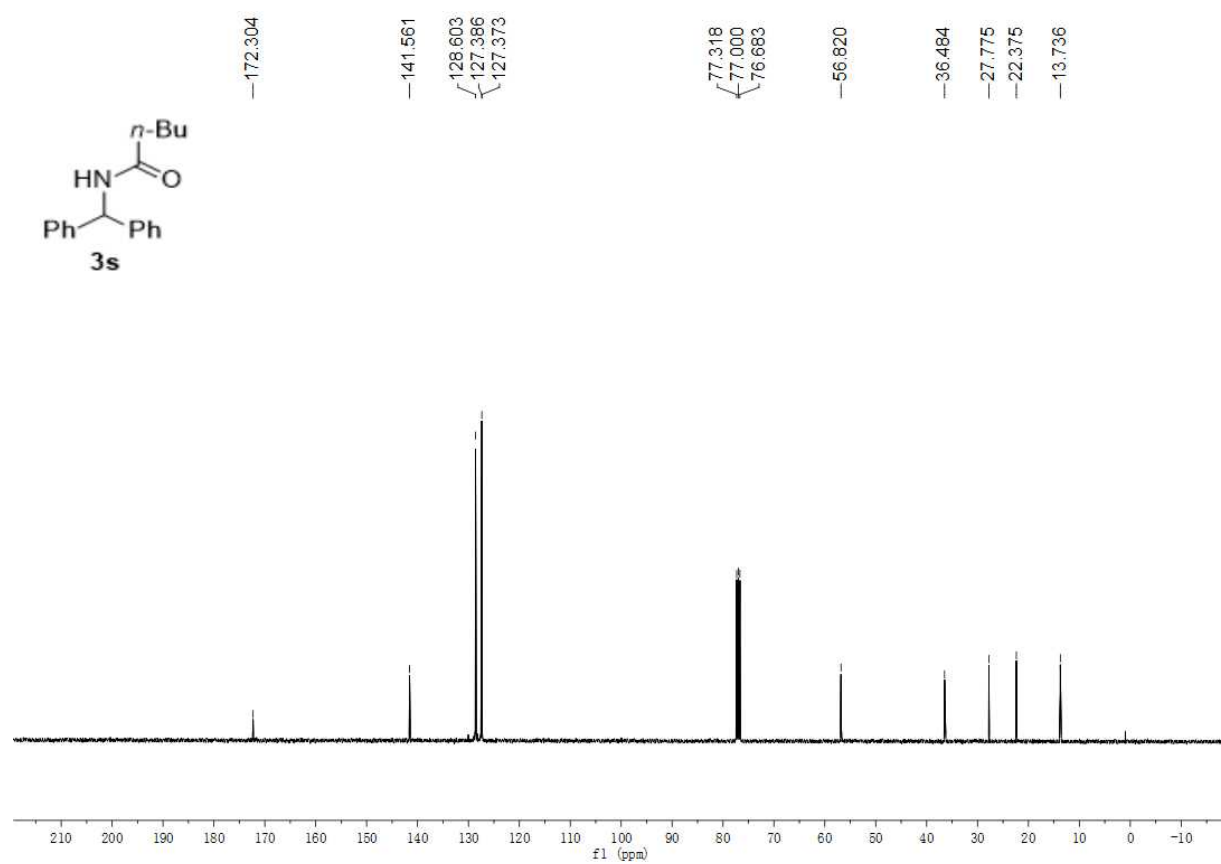

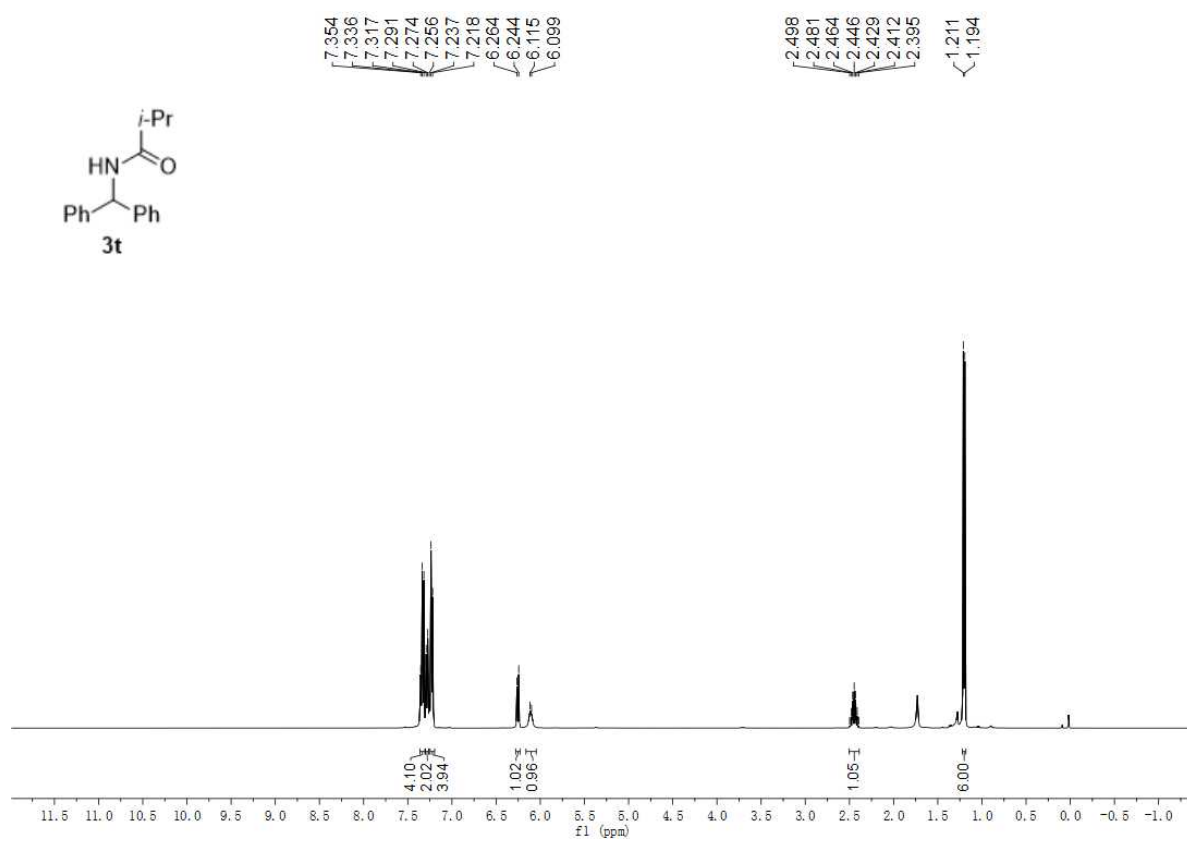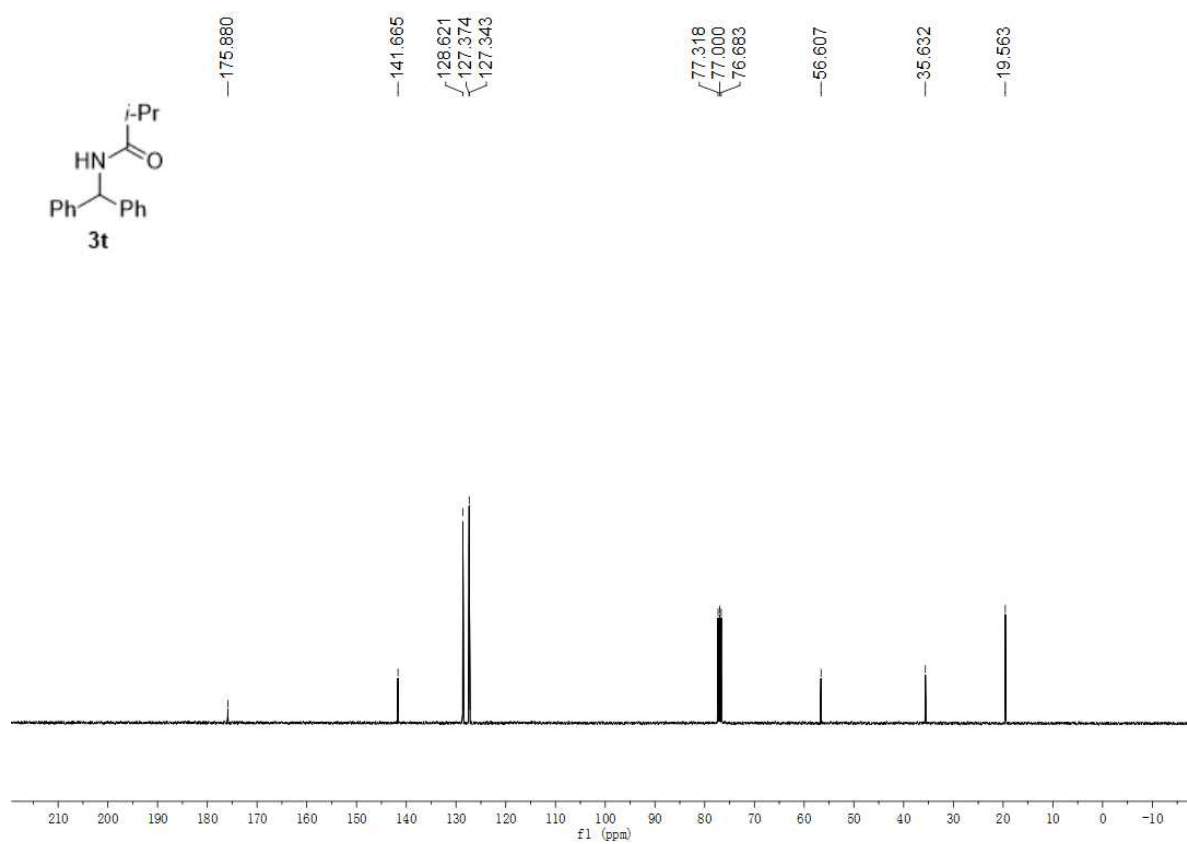

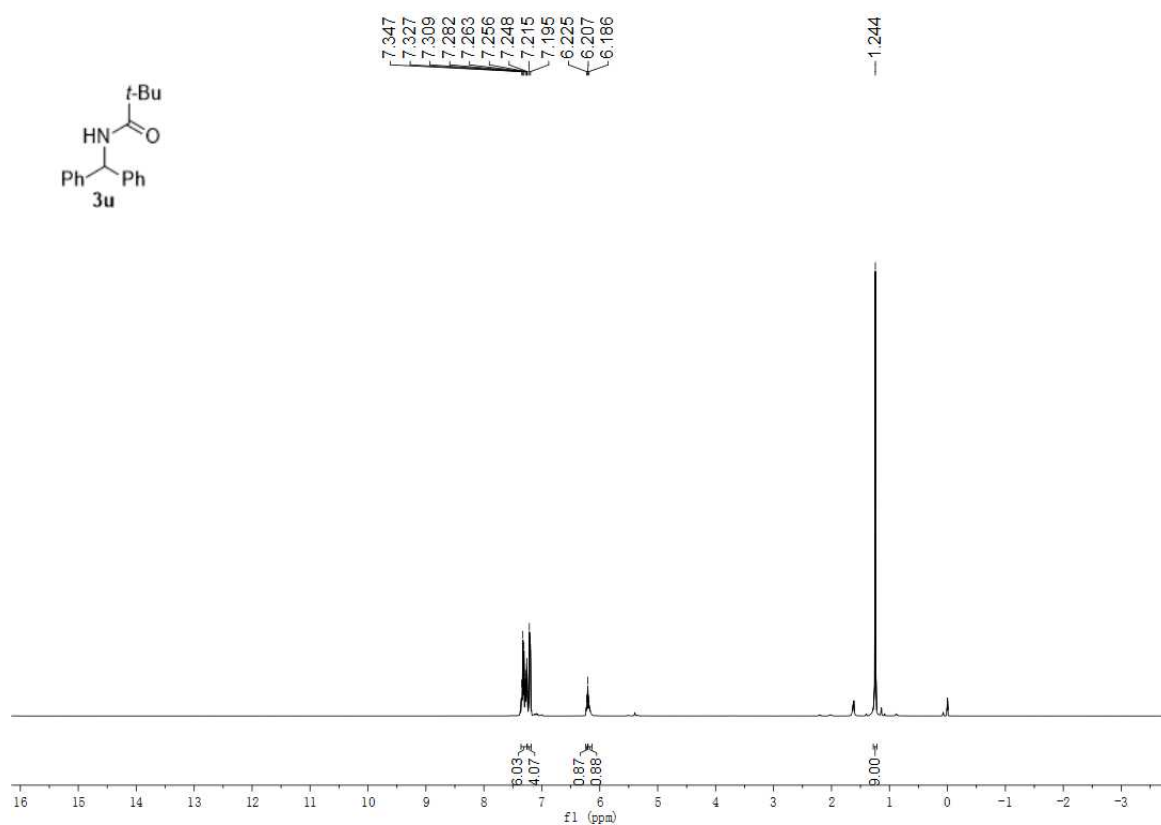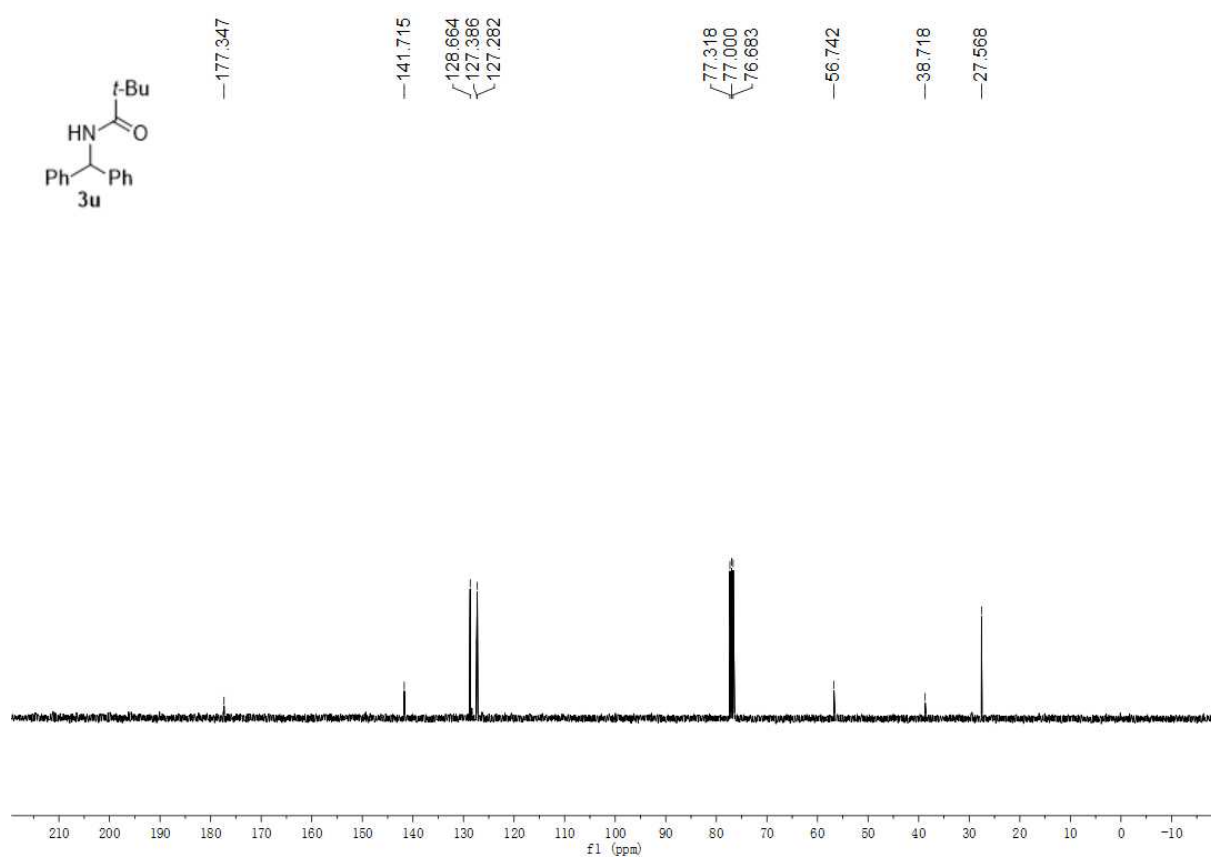

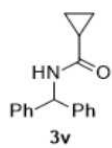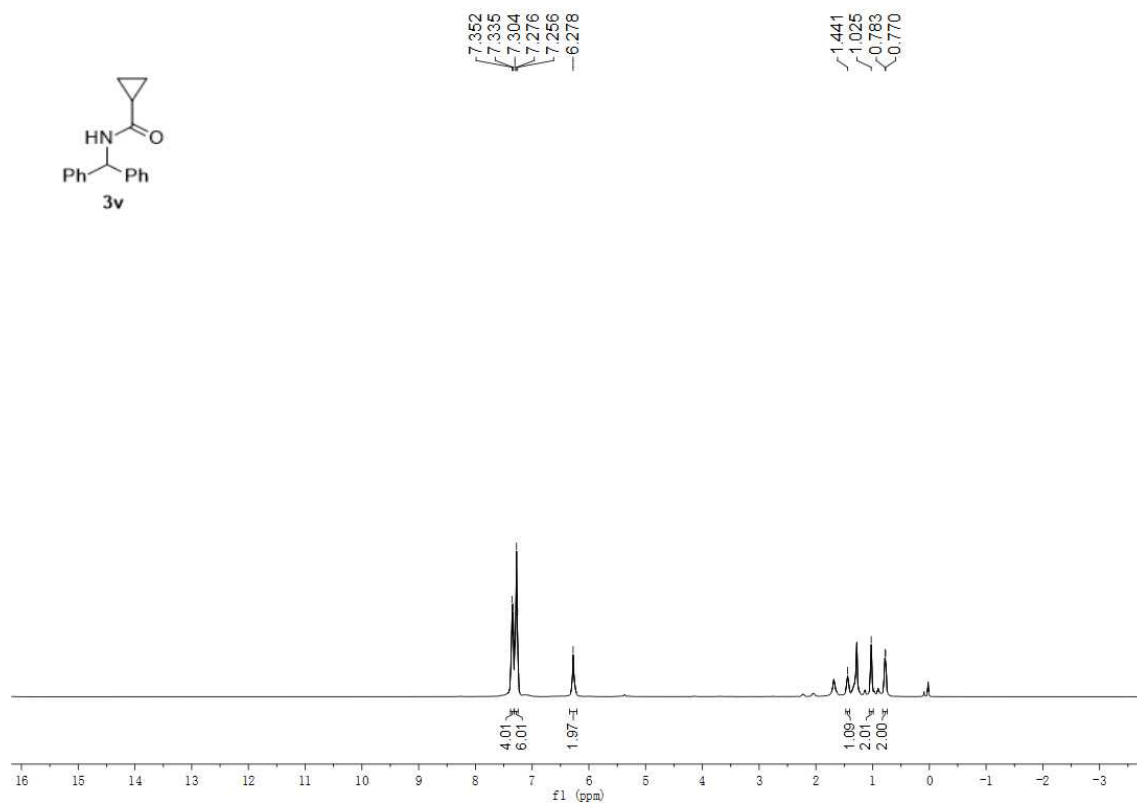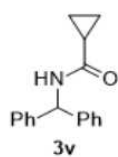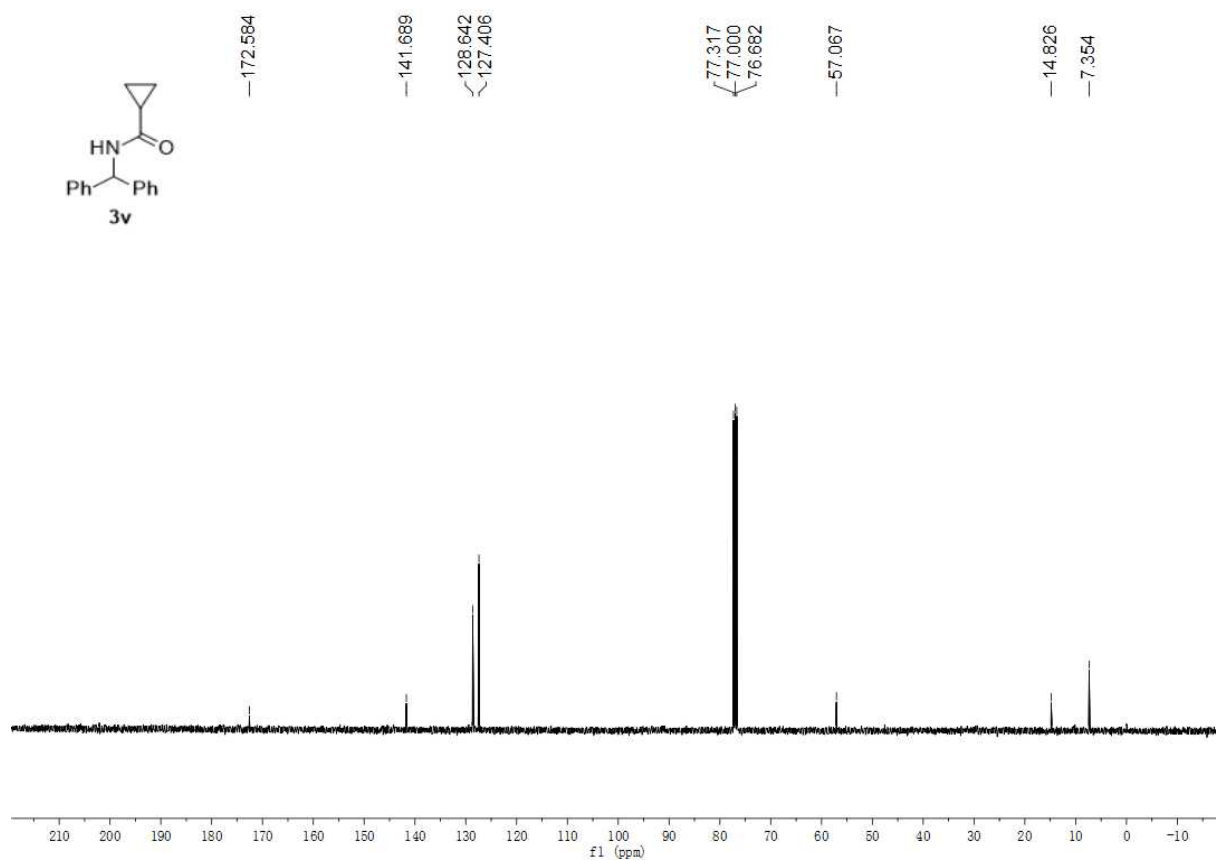



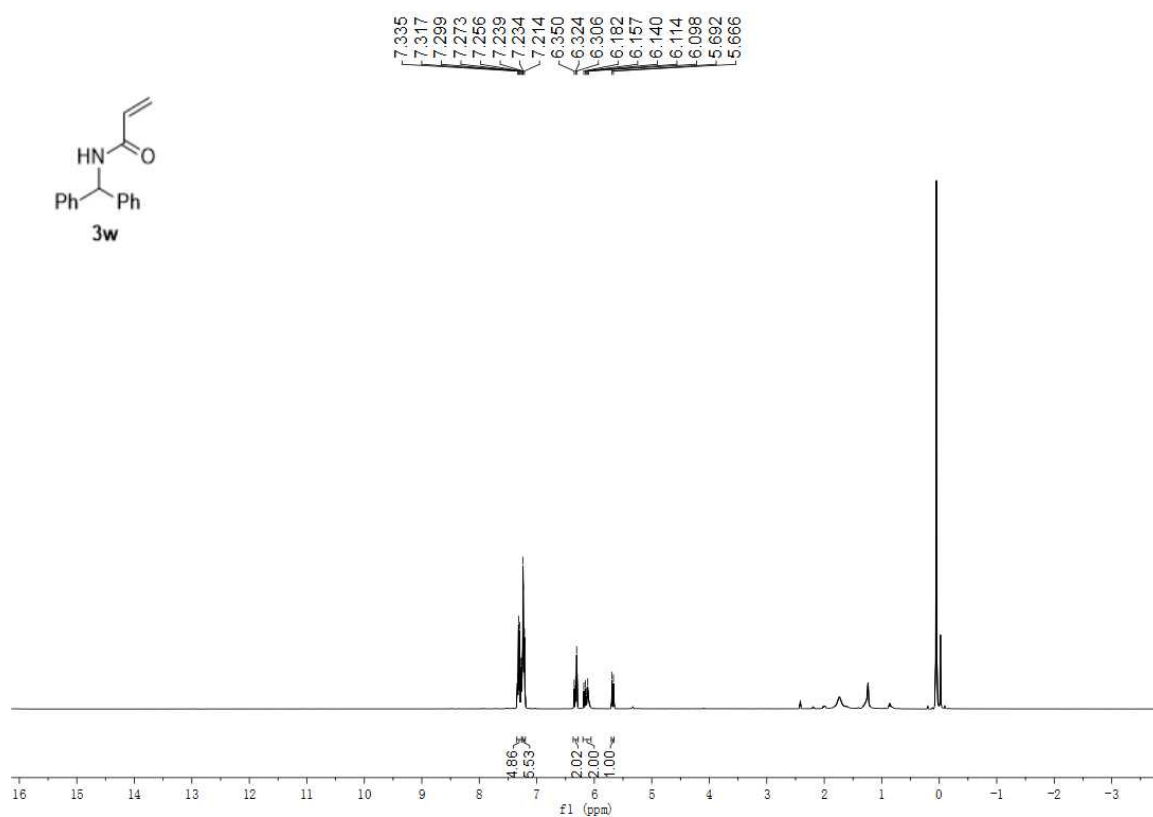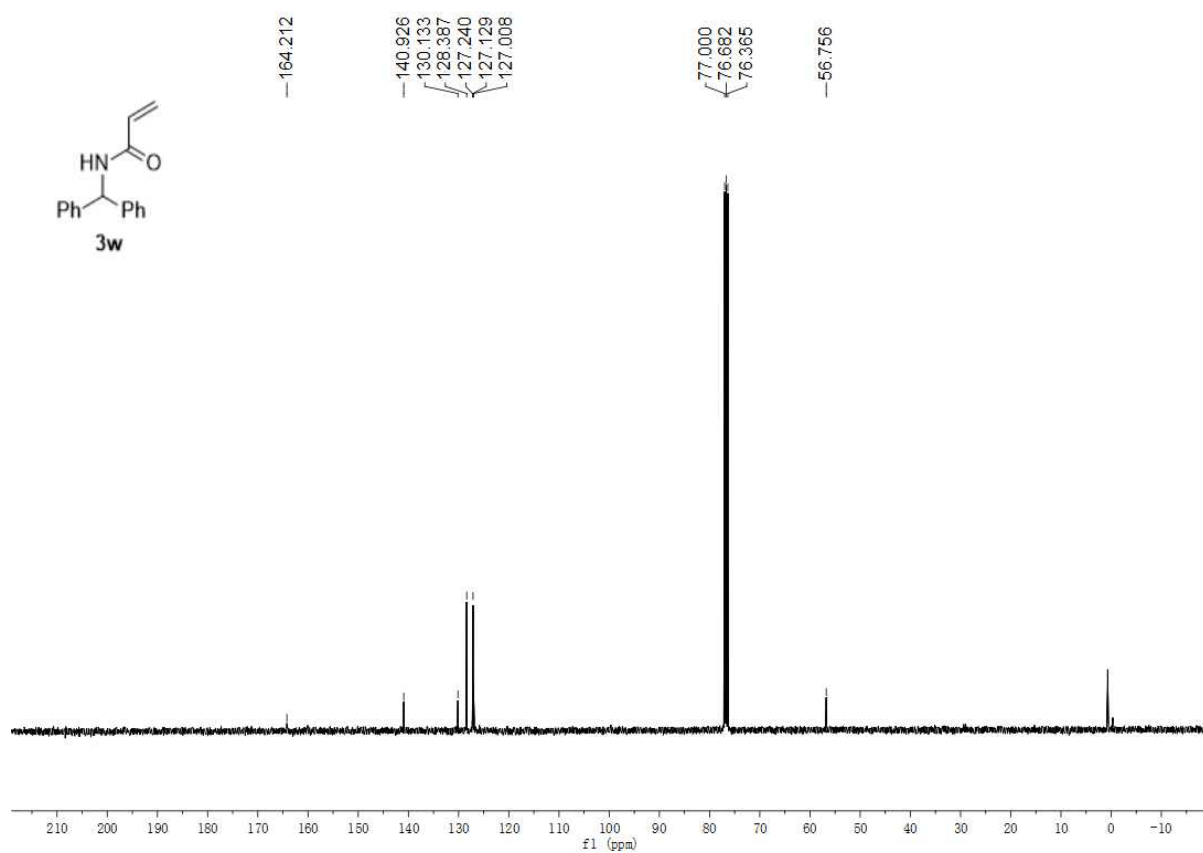

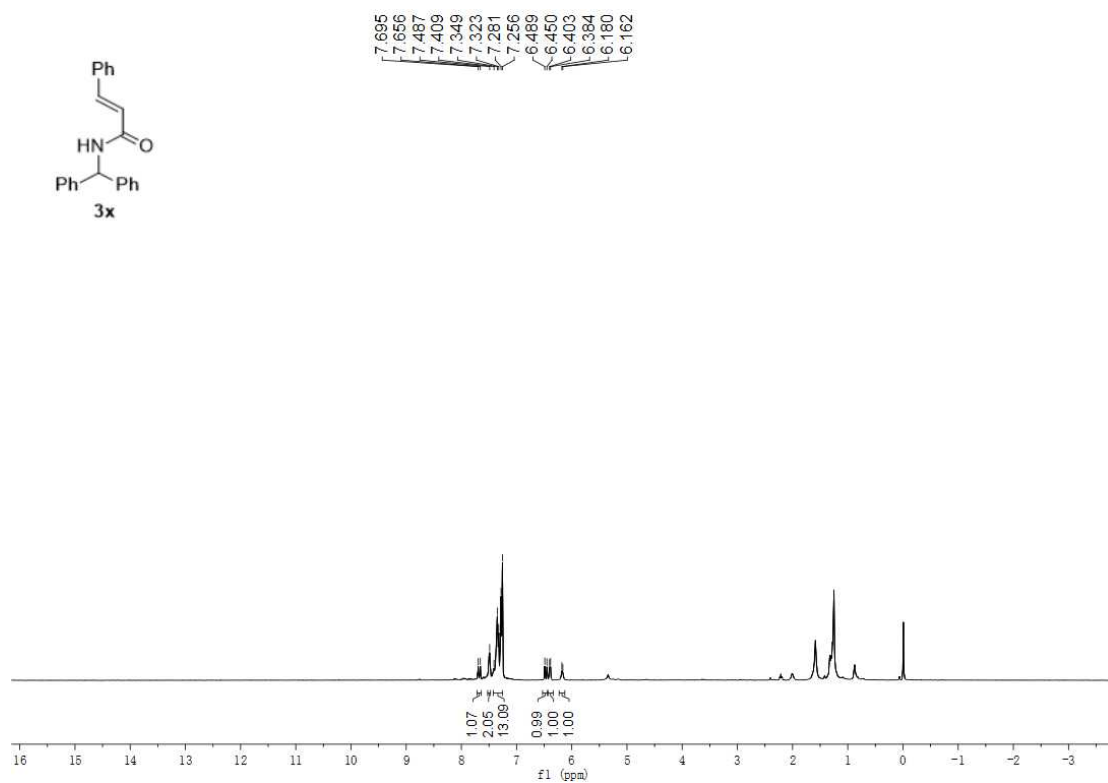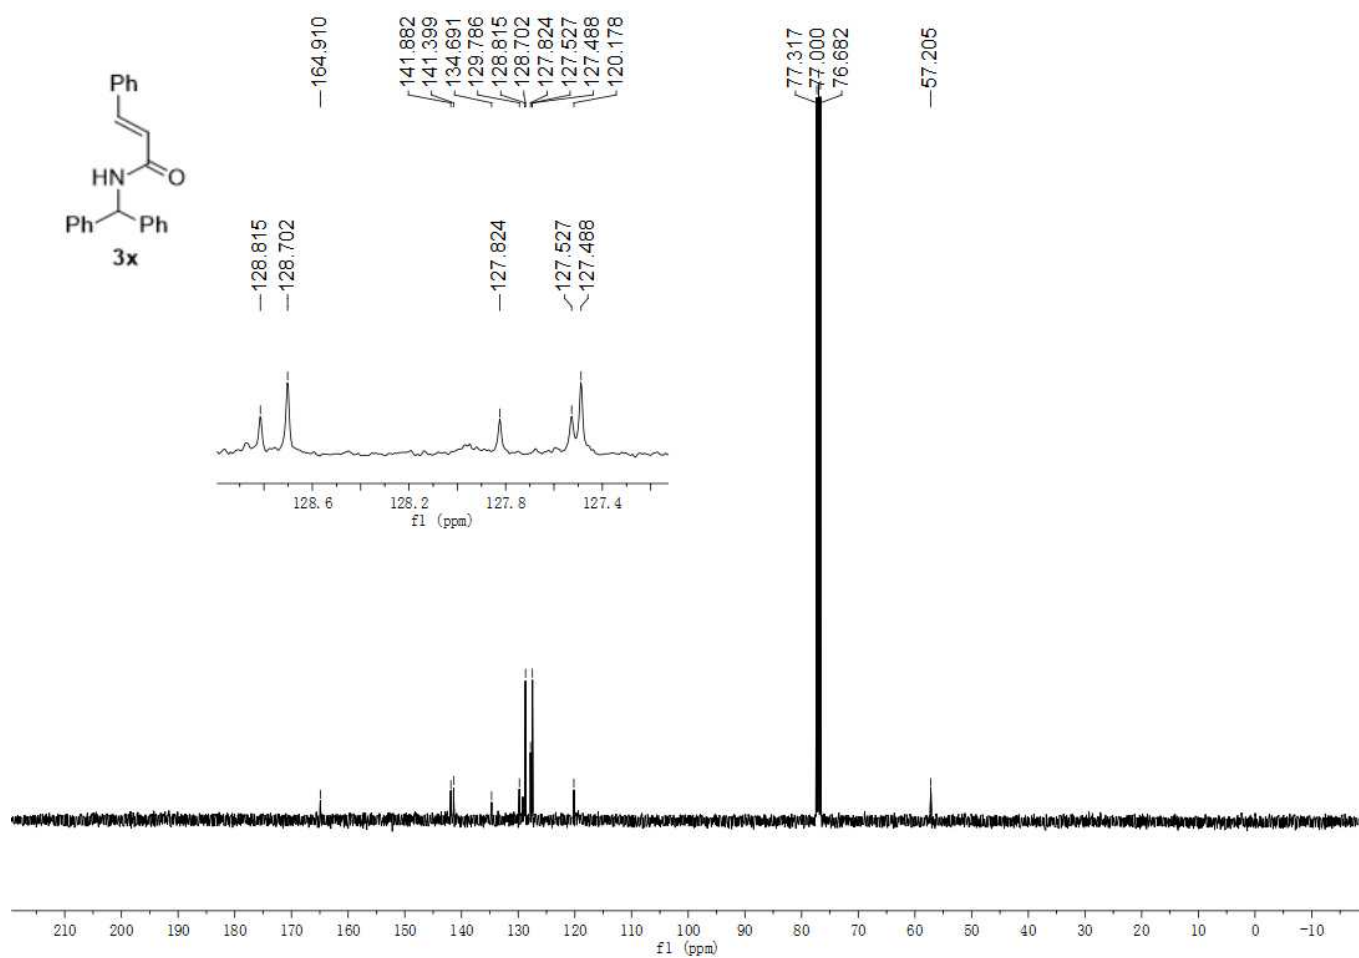

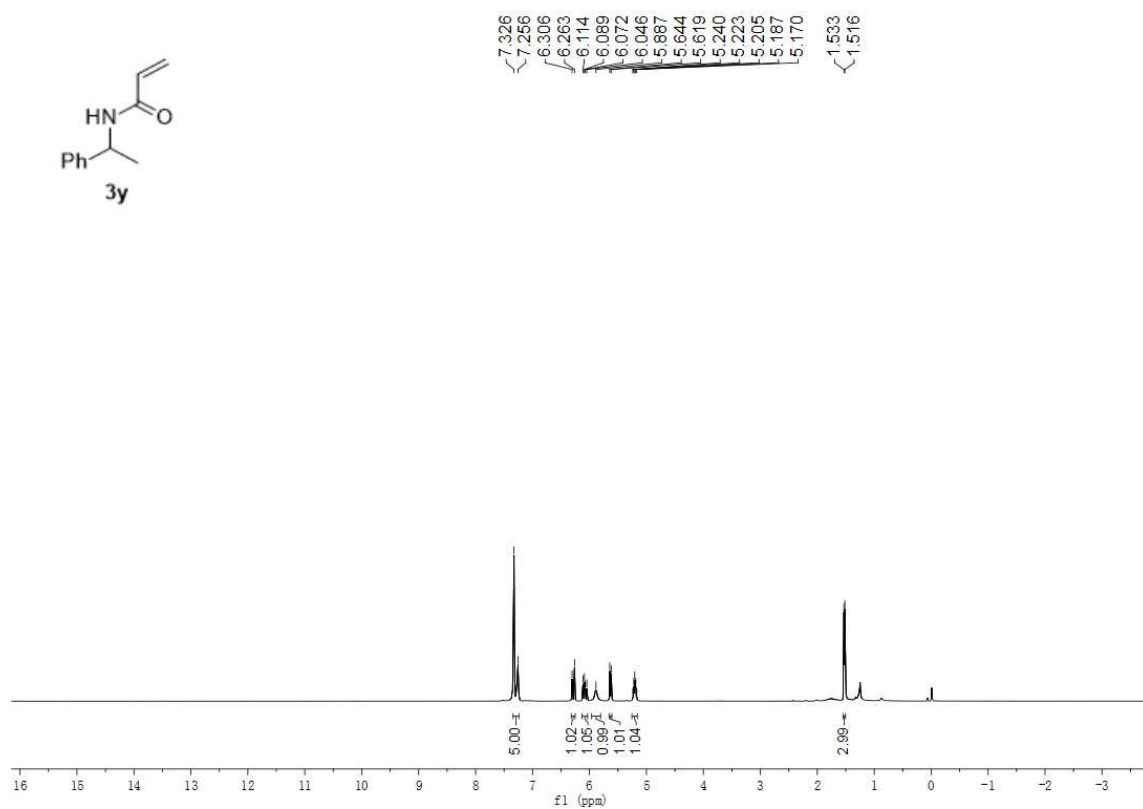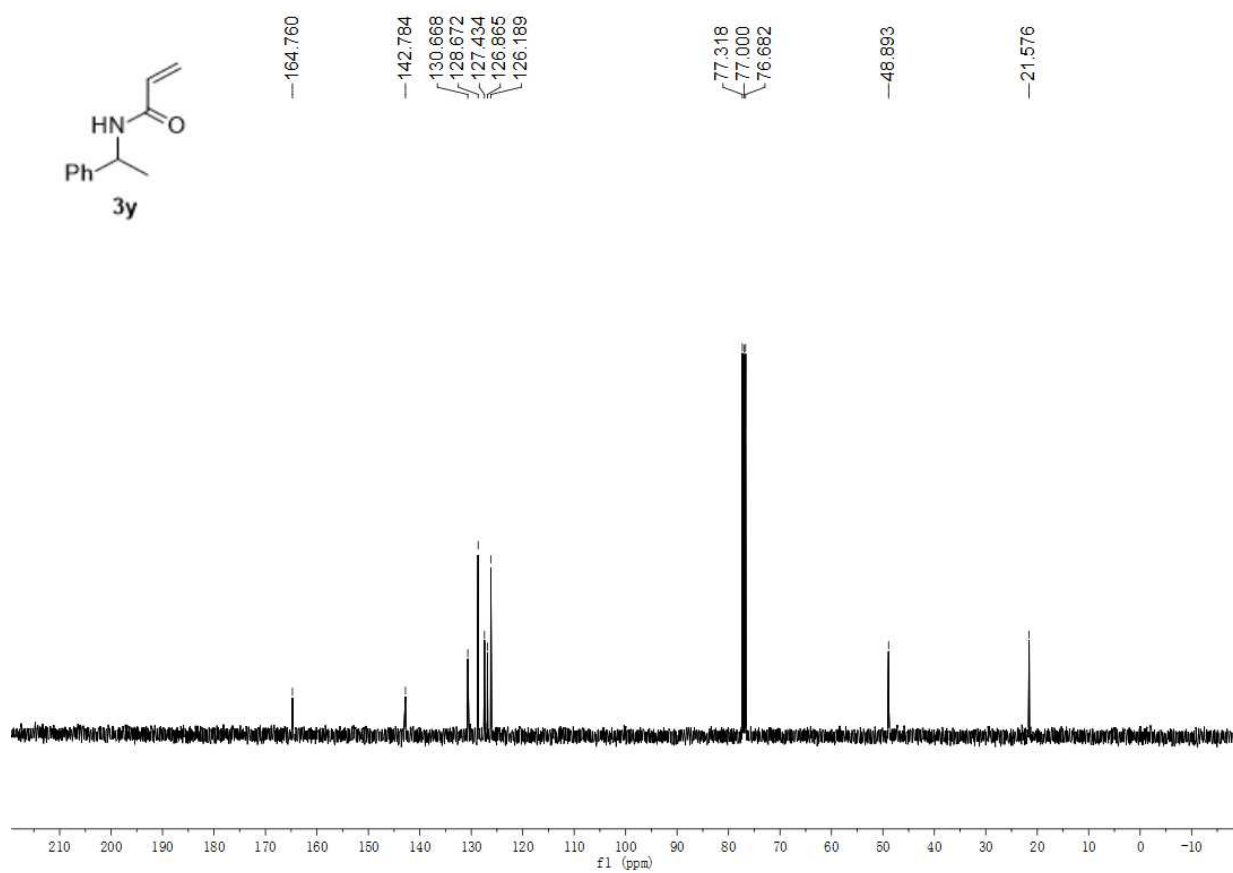

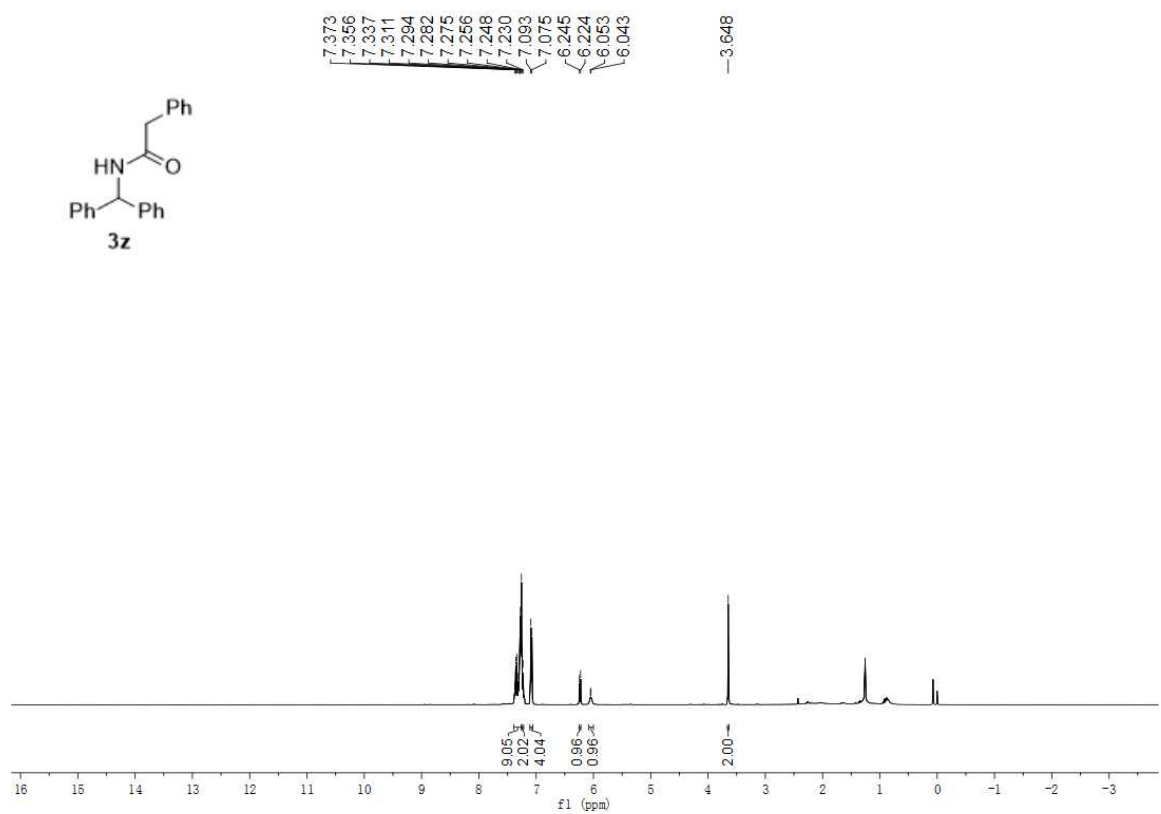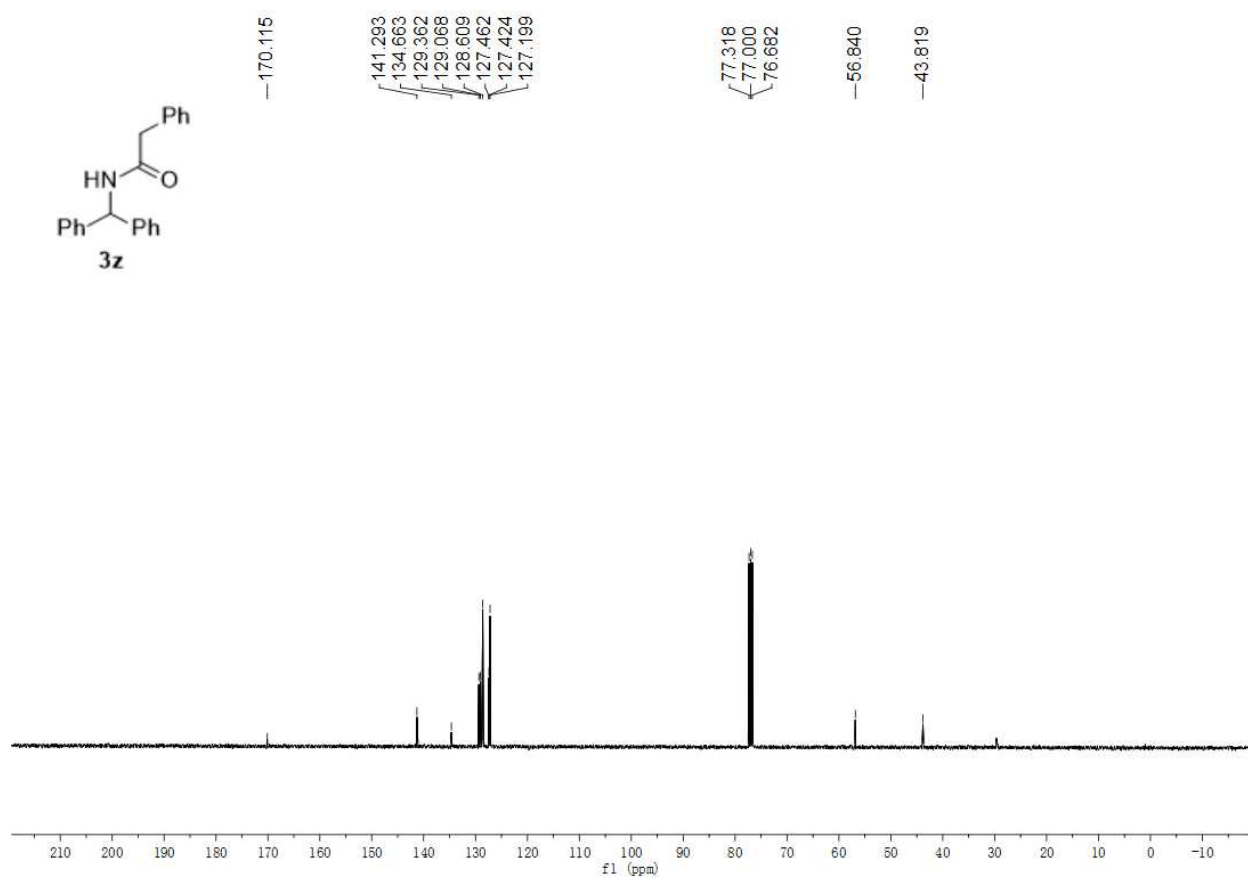

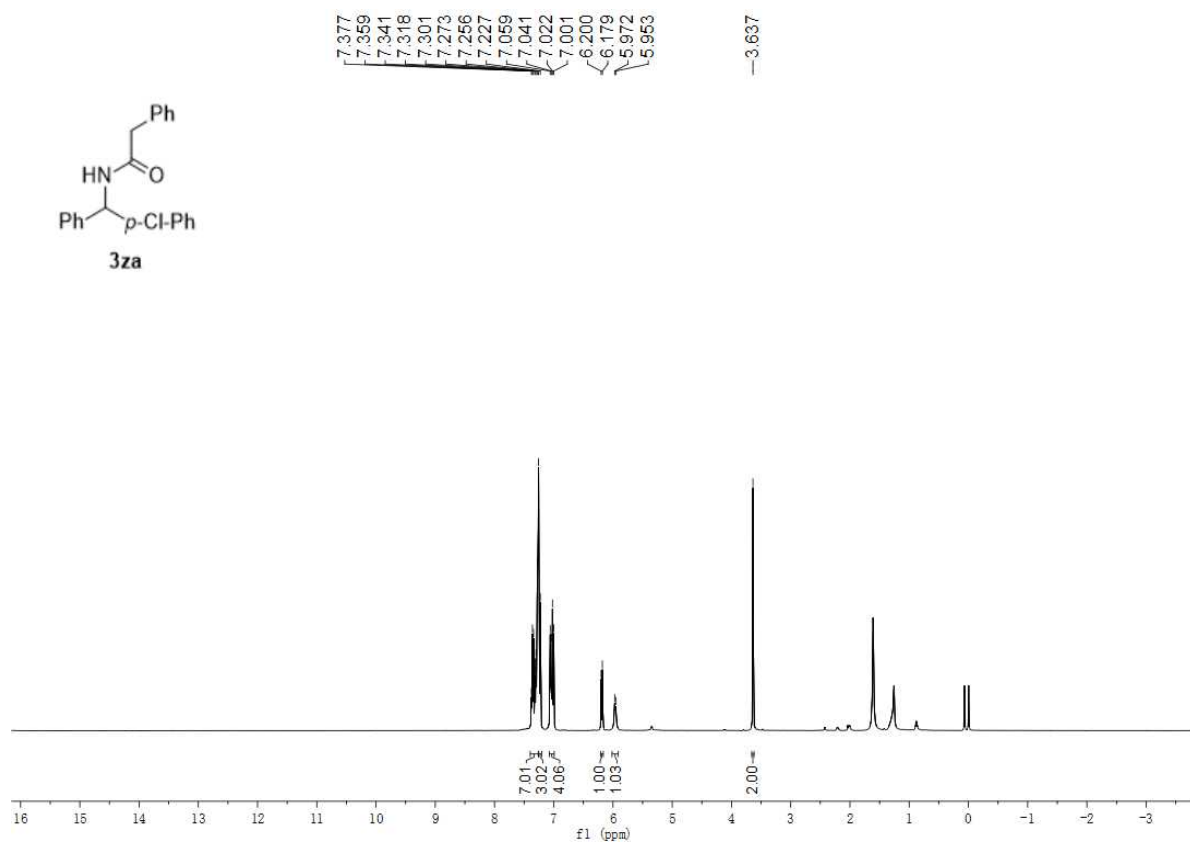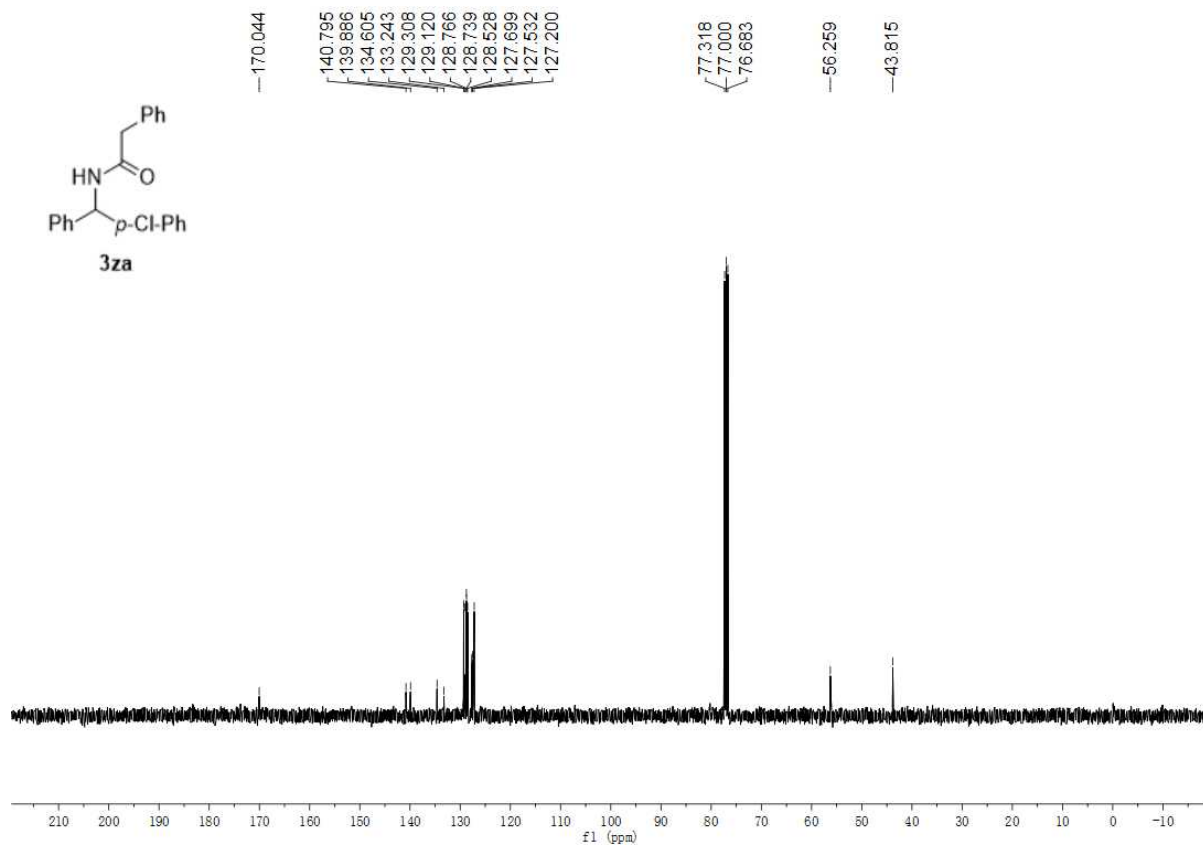

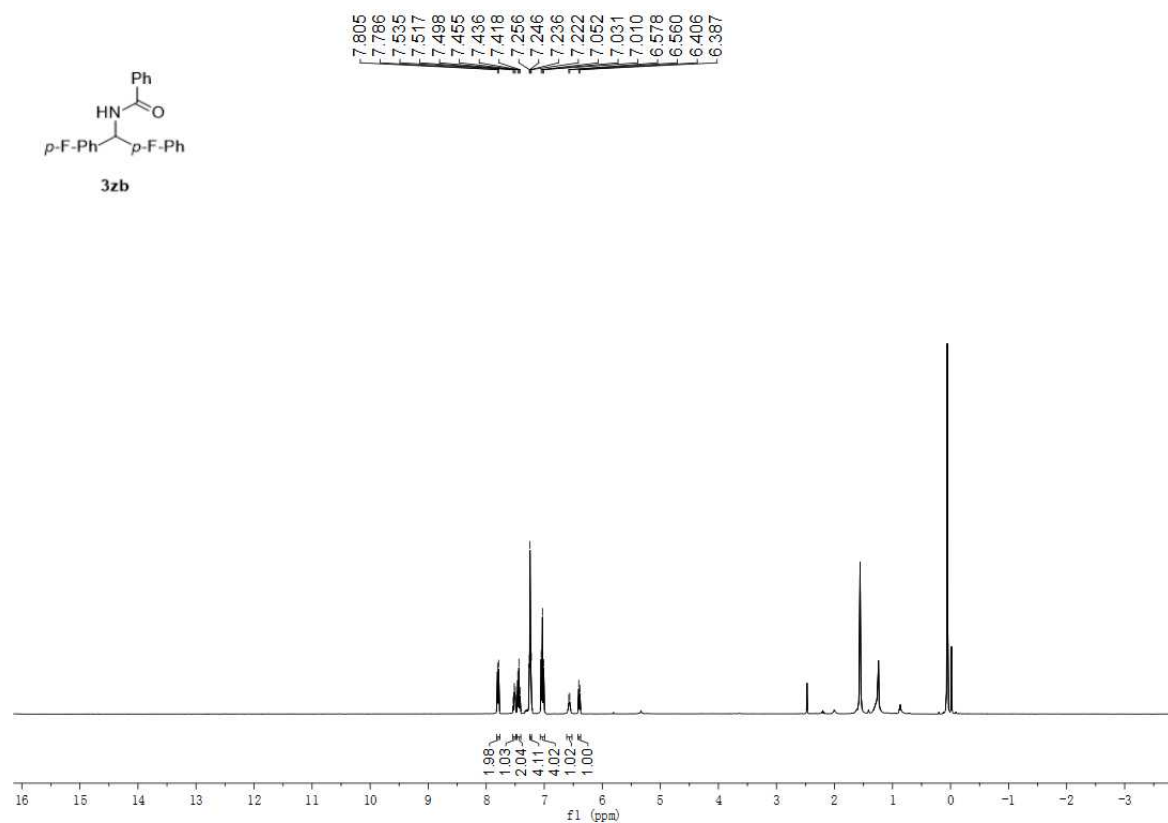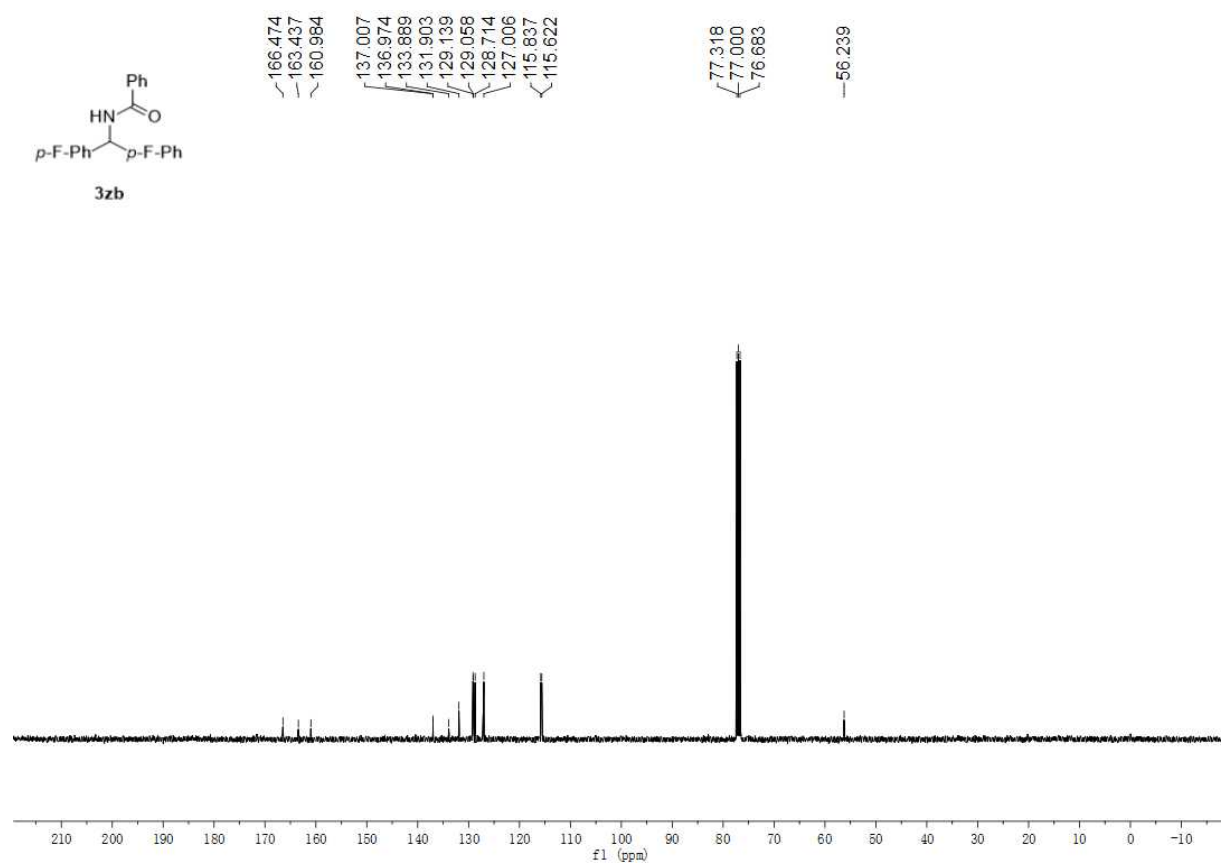

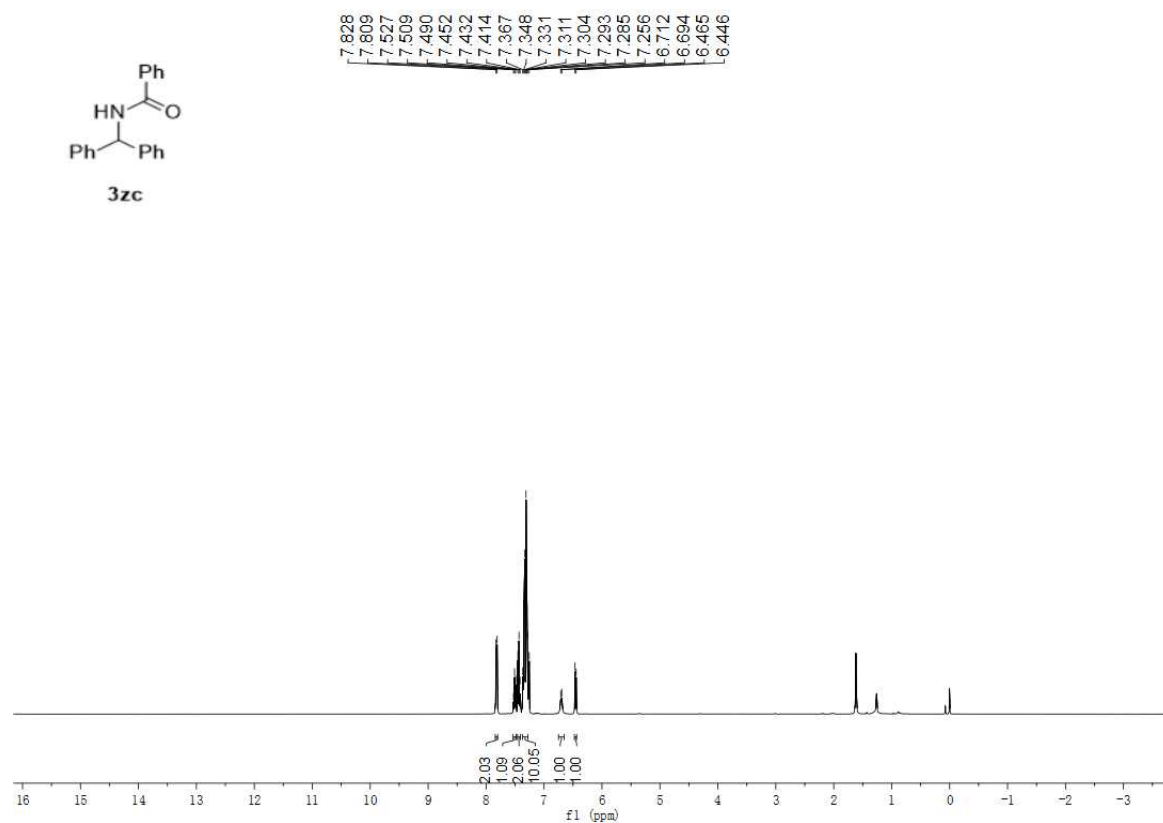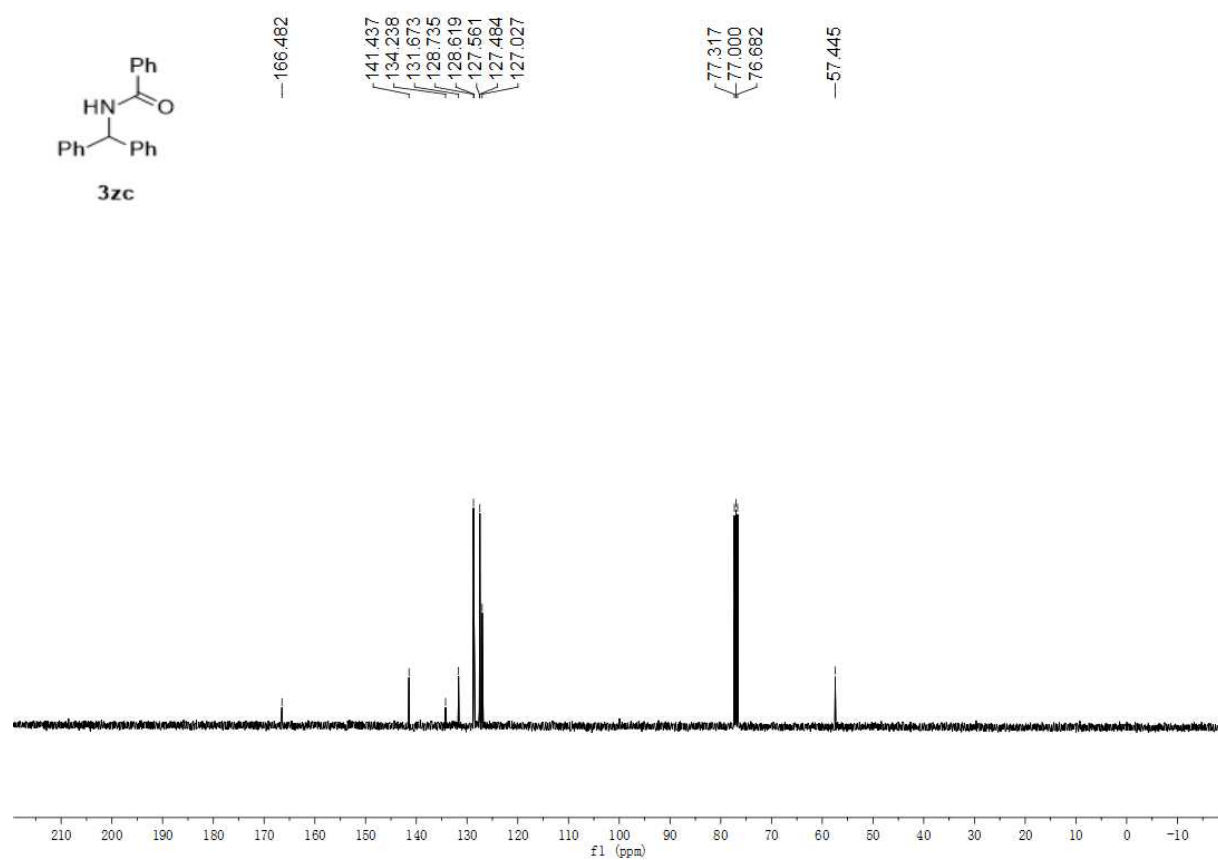

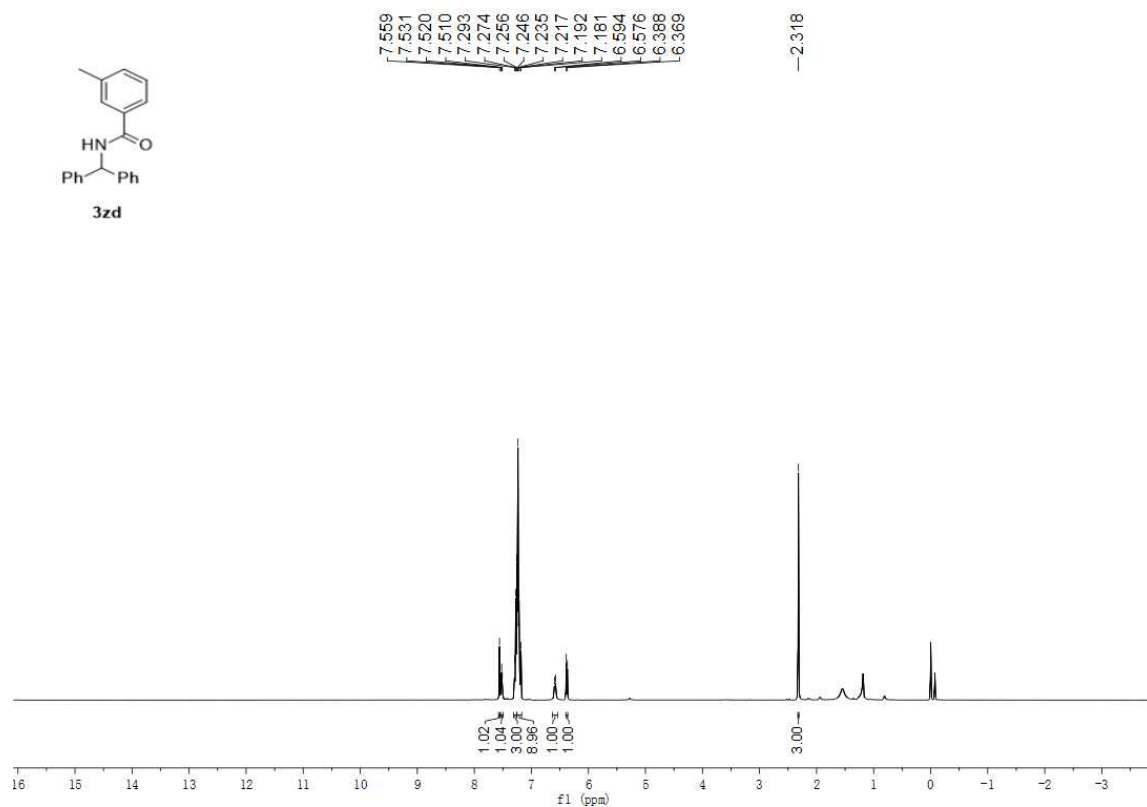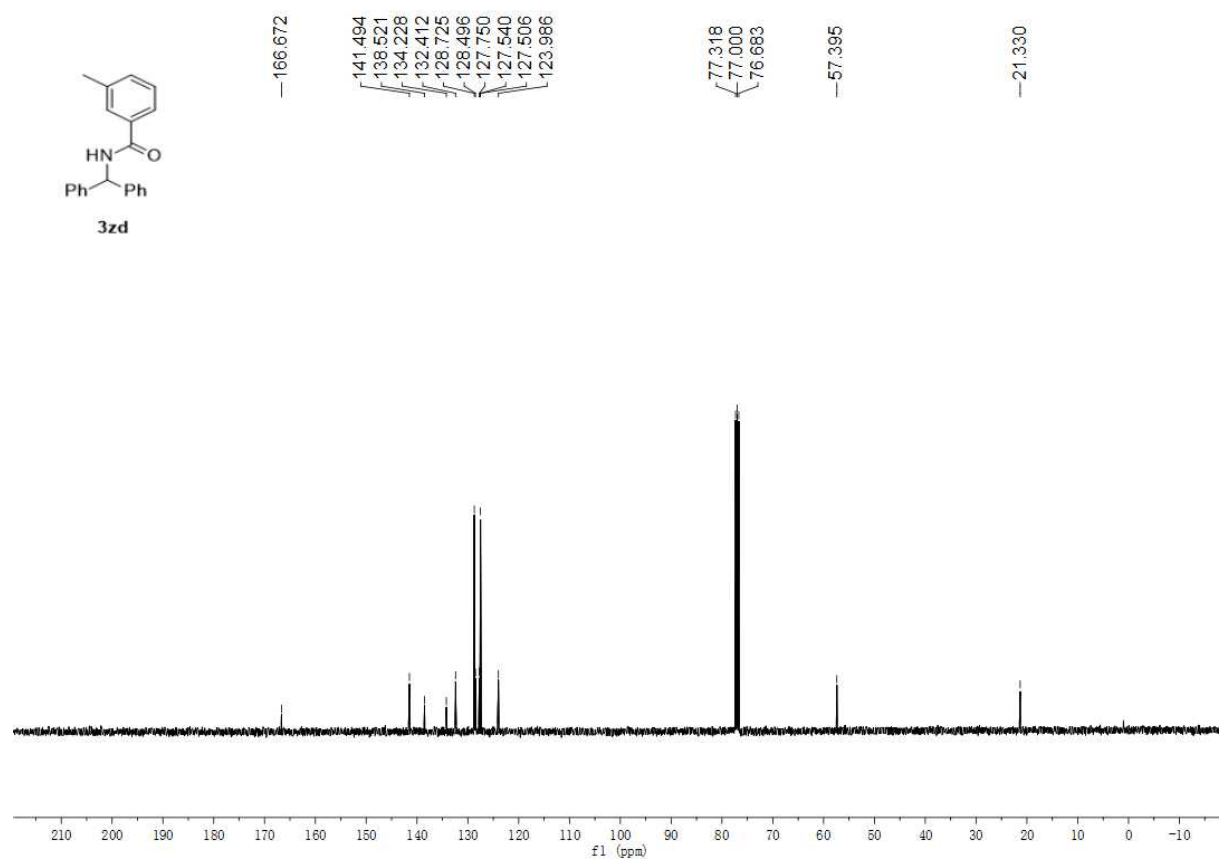



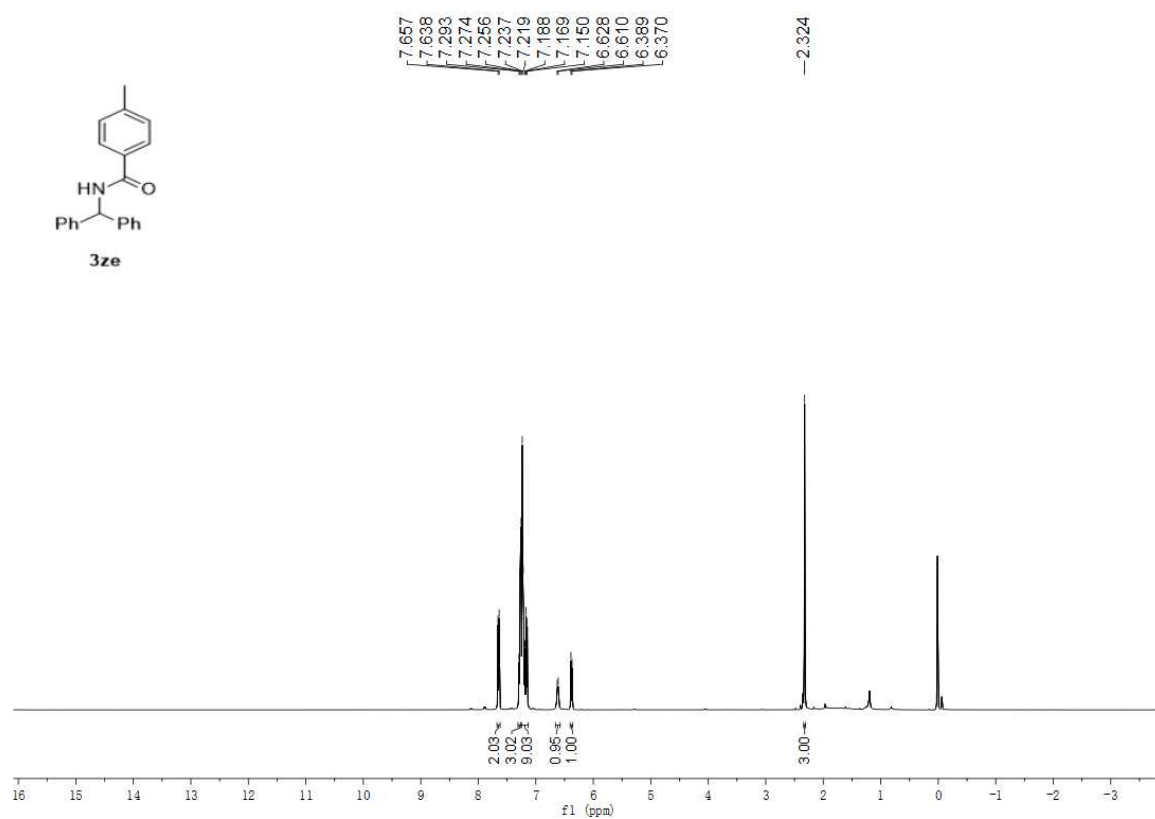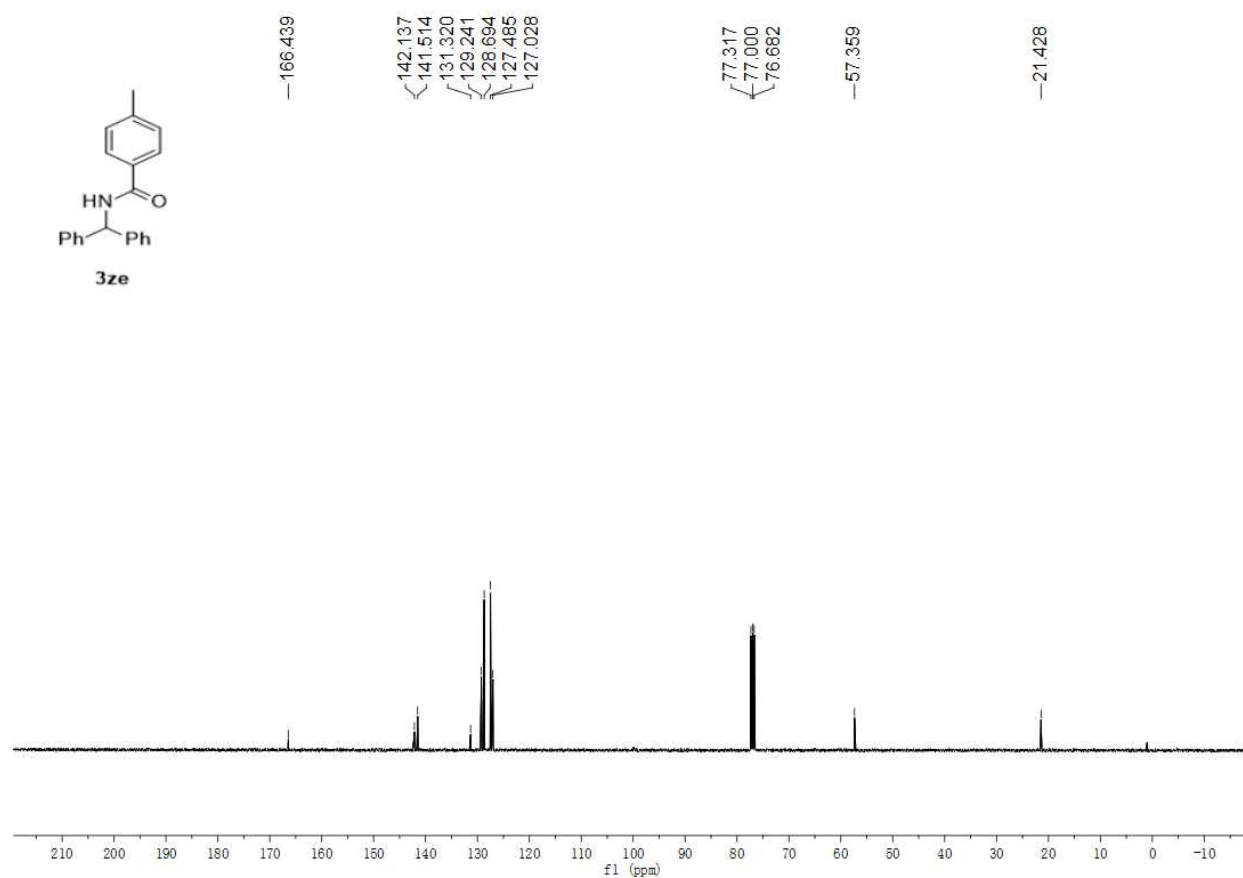

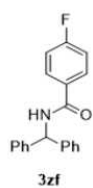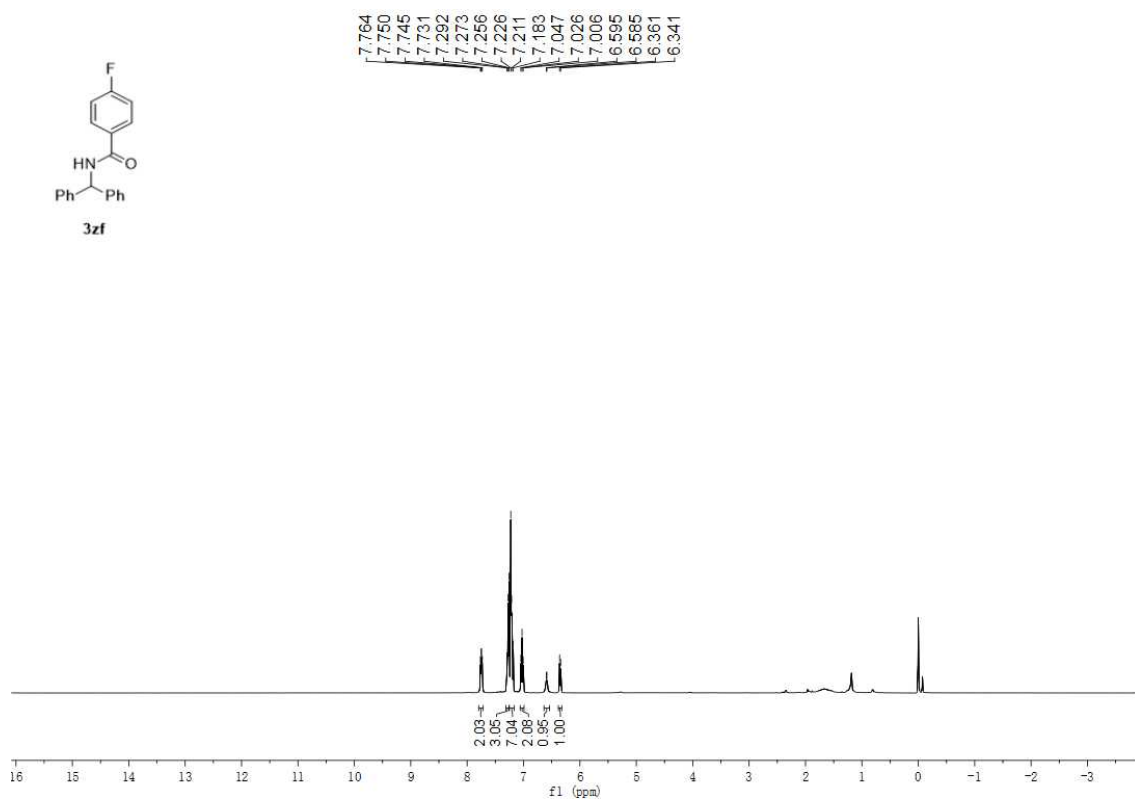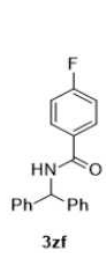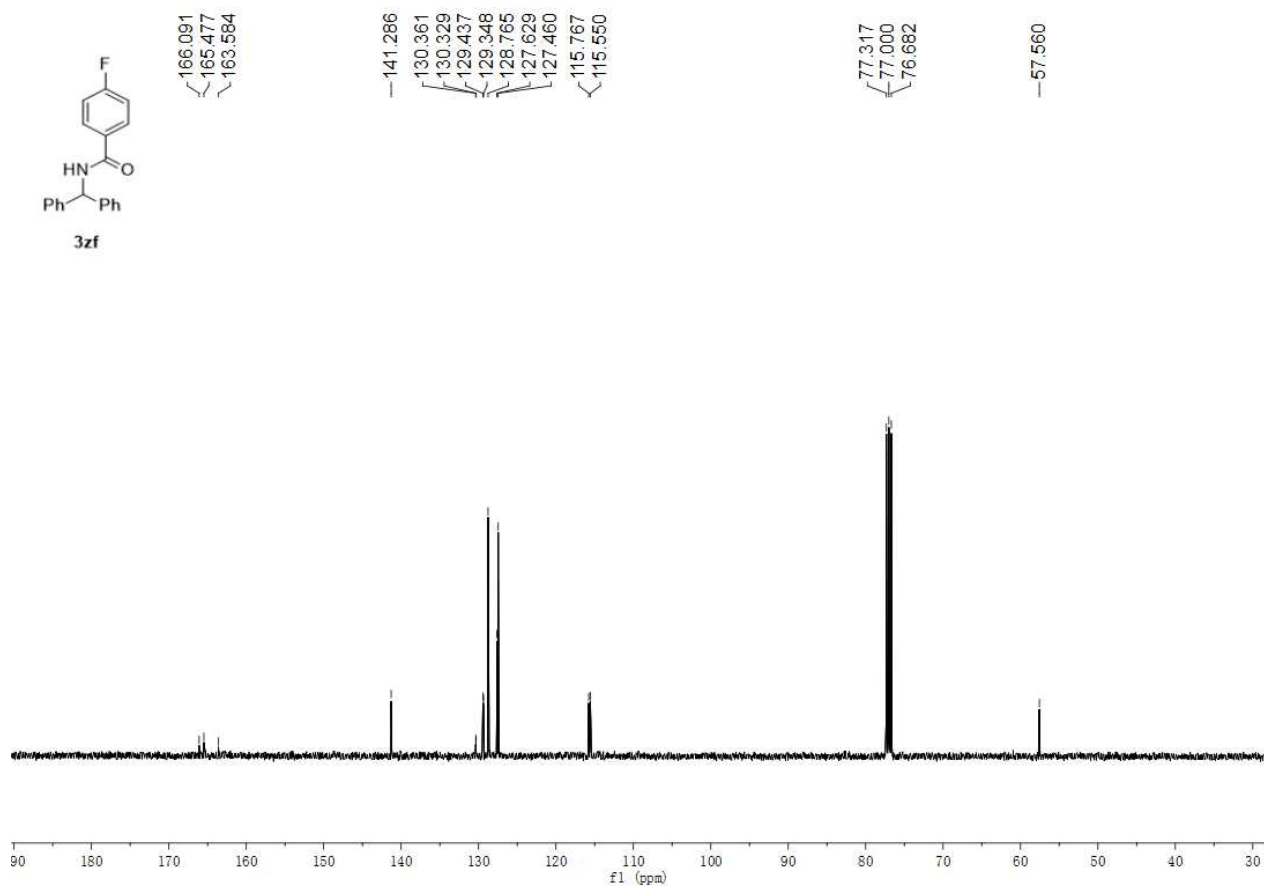

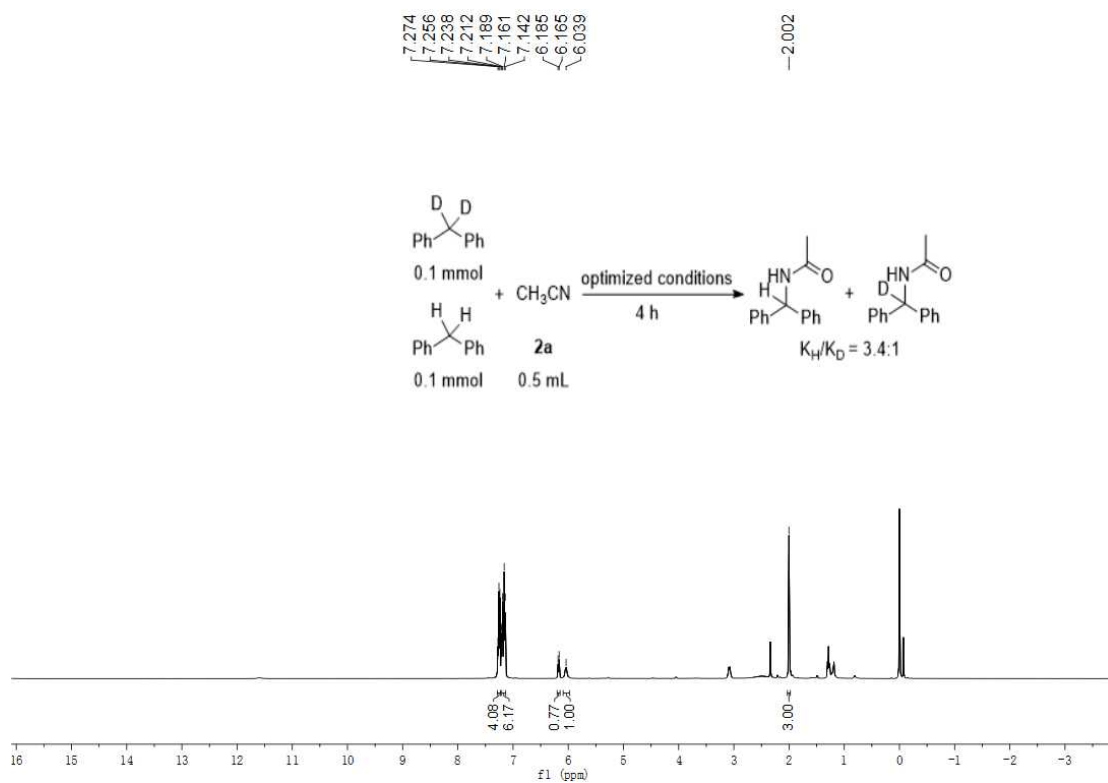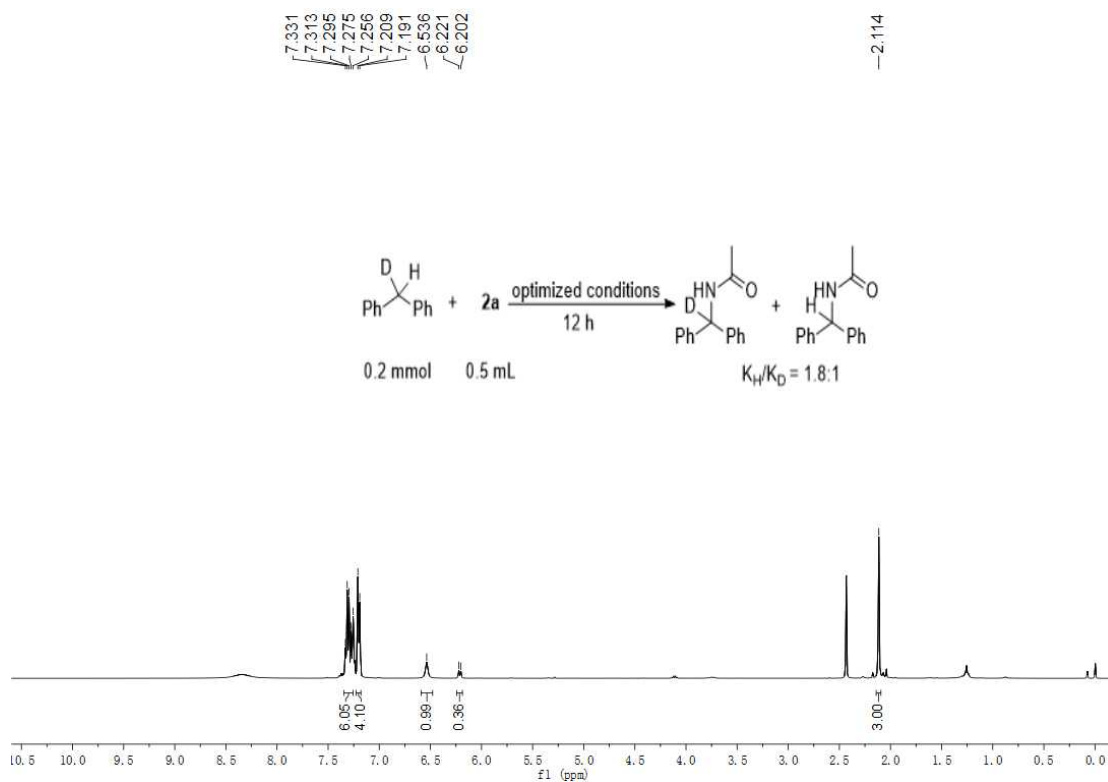

Supplement: c7ob00512a1.pdf [file c7ob00512a1.pdf]
